# Supplementary material for: Associations between shift work characteristics, shift work schedules, sleep and burnout in North American police officers: a cross-sectional study
Source: PubMed Central journal article supplement — BMJ Open. 2019 Dec 1;9(11):e030302. doi: 10.1136/bmjopen-2019-030302 (PMC6924705; doi:10.1136/bmjopen-2019-030302), 2019-12-01
Supplement: bmjopen-2019-030302.draft_revisions.pdf [file bmjopen-2019-030302.draft_revisions.pdf]

# BMJ Open

BMJ Open is committed to open peer review. As part of this commitment we make the peer review history of every article we publish publicly available.

When an article is published we post the peer reviewers' comments and the authors' responses online. We also post the versions of the paper that were used during peer review. These are the versions that the peer review comments apply to.

The versions of the paper that follow are the versions that were submitted during the peer review process. They are not the versions of record or the final published versions. They should not be cited or distributed as the published version of this manuscript.

BMJ Open is an open access journal and the full, final, typeset and author-corrected version of record of the manuscript is available on our site with no access controls, subscription charges or pay-per-view fees (<http://bmjopen.bmj.com>).

If you have any questions on BMJ Open's open peer review process please email [info.bmjopen@bmj.com](mailto:info.bmjopen@bmj.com)

# BMJ Open

## The impact of shift work characteristics, shift work schedules and sleep on burnout in police officers

|                               |                                                                                                                                                                                                                                                                                                                                                                                                                                                                                                                                                                                                                                                                                                                                                                                                                                                                                                                                                                                                                                                                                                                                                                                                                                                                                                                                                                                                |
|-------------------------------|------------------------------------------------------------------------------------------------------------------------------------------------------------------------------------------------------------------------------------------------------------------------------------------------------------------------------------------------------------------------------------------------------------------------------------------------------------------------------------------------------------------------------------------------------------------------------------------------------------------------------------------------------------------------------------------------------------------------------------------------------------------------------------------------------------------------------------------------------------------------------------------------------------------------------------------------------------------------------------------------------------------------------------------------------------------------------------------------------------------------------------------------------------------------------------------------------------------------------------------------------------------------------------------------------------------------------------------------------------------------------------------------|
| Journal:                      | <i>BMJ Open</i>                                                                                                                                                                                                                                                                                                                                                                                                                                                                                                                                                                                                                                                                                                                                                                                                                                                                                                                                                                                                                                                                                                                                                                                                                                                                                                                                                                                |
| Manuscript ID                 | bmjopen-2019-030302                                                                                                                                                                                                                                                                                                                                                                                                                                                                                                                                                                                                                                                                                                                                                                                                                                                                                                                                                                                                                                                                                                                                                                                                                                                                                                                                                                            |
| Article Type:                 | Research                                                                                                                                                                                                                                                                                                                                                                                                                                                                                                                                                                                                                                                                                                                                                                                                                                                                                                                                                                                                                                                                                                                                                                                                                                                                                                                                                                                       |
| Date Submitted by the Author: | 07-Mar-2019                                                                                                                                                                                                                                                                                                                                                                                                                                                                                                                                                                                                                                                                                                                                                                                                                                                                                                                                                                                                                                                                                                                                                                                                                                                                                                                                                                                    |
| Complete List of Authors:     | <p>Peterson, Scott; Monash Institute of Cognitive and Clinical Neuroscience, School of Psychological Sciences, Monash University<br/> Wolkow, Alexander; Monash University, Monash Institute of Cognitive and Clinical Neuroscience<br/> Lockley, Steven; Monash Institute of Cognitive and Clinical Neuroscience, School of Psychological Sciences, Monash University; Division of Sleep and Circadian Disorders, Departments of Medicine and Neurology, Brigham and Women's Hospital<br/> O'Brien, Conor; Brigham and Women's Hospital Department of Medicine, Division of Sleep and Circadian Disorders<br/> Qadri, Salim; Brigham and Women's Hospital, Division of Sleep and Circadian Disorders, Departments of Medicine and Neurology<br/> Sullivan, Jason; Brigham and Women's Hospital, Division of Sleep and Circadian Disorders, Departments of Medicine and Neurology<br/> Czeisler, Charles; Brigham and Women's Hospital, Division of Sleep and Circadian Disorders; Harvard Medical School, Division of Sleep Medicine<br/> Rajaratnam, Shantha M. W.; Monash University, Monash Institute of Cognitive and Clinical Neurosciences and School of Psychological Sciences; Harvard Medical School, Division of Sleep Medicine<br/> Barger, Laura; Brigham and Women's Hospital, Division of Sleep and Circadian Disorders; Harvard Medical School, Division of Sleep Medicine</p> |
| Keywords:                     | MENTAL HEALTH, SLEEP MEDICINE, OCCUPATIONAL & INDUSTRIAL MEDICINE                                                                                                                                                                                                                                                                                                                                                                                                                                                                                                                                                                                                                                                                                                                                                                                                                                                                                                                                                                                                                                                                                                                                                                                                                                                                                                                              |
|                               |                                                                                                                                                                                                                                                                                                                                                                                                                                                                                                                                                                                                                                                                                                                                                                                                                                                                                                                                                                                                                                                                                                                                                                                                                                                                                                                                                                                                |

SCHOLARONE™  
Manuscripts

1  
2  
3 **Title:** The impact of shift work characteristics, shift work schedules and sleep on burnout in  
4  
5 police officers  
6  
7  
8  
9

10 **Authors:** Scott A. Peterson, BS<sup>1,†</sup>, Alexander P. Wolkow, PhD<sup>1,†</sup>, Steven W. Lockley, PhD<sup>1,</sup>  
11  
12 <sup>2,3</sup>, Conor S. O'Brien, BA<sup>2</sup>, Salim Qadri, BS<sup>2</sup>, Jason P. Sullivan, BS<sup>2</sup>, Charles A. Czeisler,  
13  
14 PhD, MD, FRCP<sup>2,3</sup>, Shantha M. W. Rajaratnam, PhD<sup>1,2,3</sup>, Laura K. Barger, PhD<sup>2,3,\*</sup>  
15  
16  
17  
18

19 **Author Affiliations:**

20  
21 <sup>1</sup>Monash Institute of Cognitive and Clinical Neuroscience, School of Psychological Sciences,  
22  
23 Monash University, Clayton, VIC, Australia  
24

25  
26 <sup>2</sup>Division of Sleep and Circadian Disorders, Departments of Medicine and Neurology,  
27  
28 Brigham and Women's Hospital, Boston, MA, USA  
29

30  
31 <sup>3</sup>Division of Sleep Medicine, Harvard Medical School, Boston, MA, USA  
32  
33  
34

35 **†Scott A. Peterson and Alexander P. Wolkow contributed equally to this paper**  
36  
37  
38  
39

40 **\*Corresponding Author:**

41  
42 Laura K. Barger, PhD  
43

44  
45 Division of Sleep and Circadian Disorders, Departments of Medicine and Neurology,  
46

47  
48 Brigham and Women's Hospital, 221 Longwood Avenue,  
49

50  
51 Boston MA 02115  
52

53  
54 Tel: (617) 732-4013; Fax: (617) 732-4015  
55

56  
57 Email: [laura\\_barger@hms.harvard.edu](mailto:laura_barger@hms.harvard.edu)  
58

59 **Word count:** 3,536  
60

## Abstract

**Objectives:** To examine associations between shift work characteristics and schedules on burnout in police and whether sleep duration and sleepiness were associated with burnout.

**Methods:** Police officers (n=3140) completed the Maslach Burnout Inventory (emotional exhaustion, depersonalisation, personal accomplishment) and self-reported shift schedules (irregular, rotating, fixed), shift characteristics (night, duration, frequency, work hours), sleep duration and sleepiness.

**Results:** Irregular schedules, long shifts ( $\geq 11$  hours), mandatory overtime, short sleep and sleepiness were associated with increased risk of overall burnout in police. Police working a greater frequency of long shifts were more likely to have emotional exhaustion (adjusted odds ratio 1.91, 95% CI 1.35-2.72) than those not working long shifts. Night shifts were associated with depersonalisation (1.32, 1.05-1.66) compared to not working nights. Long work weeks ( $\geq 48$  hours), compared to shorter weeks, were associated with low personal accomplishment (1.33, 1.12-1.58). Police working mandatory overtime had increased risk of emotional exhaustion (1.37, 1.14-1.65) than those who did not. Compared to fixed schedules, irregular schedules were associated with emotional exhaustion and depersonalisation (1.91, 1.44-2.54 and 1.39, 1.02-1.89, respectively). Police sleeping  $< 6$  hours were more likely to have emotional exhaustion (1.60, 1.33-1.93) than those sleeping longer, and excessive sleepiness was associated with emotional exhaustion (1.81, 1.50-2.18).

**Conclusions:** Irregular schedules and increased night shifts, sleep disturbances and work hours were related to higher burnout risk in police. Future research should evaluate work schedules in law enforcement that optimise shift duration and frequency, and increase consistency in scheduling and control over work hours to limit burnout in police.

**Key words:** mental health, sleep, burnout, shift work, police

### Strengths and limitations of this study

- The study examined burnout, shift work and sleep in a large sample of police officers (n=3140) from across North America.
- Shift work characteristics and schedules were closely examined in police, providing information on night shifts, long work shifts and long work weeks, overtime (voluntary and mandatory) and different work schedules (irregular, rotating and fixed)
- Sleep and shift information were based on self-reports, and thus may be subject to response bias.
- Due to the cross-sectional design of the study, associations between shift work, sleep and burnout can be inferred but not causality.

Peer review only

## INTRODUCTION

A major source of occupational stress for police officers is shift work, which can involve day, night and long duration shifts and long work weeks,<sup>1 2</sup> as well as rotating, fixed and irregular shift schedules.<sup>3</sup> Chronic exposure to occupational stressors can lead to burnout, which is a psychological syndrome comprising three dimensions: Emotional exhaustion (EE), depersonalisation (DP), and a perceived lack of personal accomplishment (PA).<sup>4</sup> Burnout can have a negative impact on the individual worker, the people whom they serve, and their organisation, with consequences including reduced productivity and decision making,<sup>5</sup> increased absenteeism and risk of leaving the job.<sup>6</sup> Indeed, retirements due to psychological ill health account for 46% of medical retirements among police in the United Kingdom.<sup>7</sup> In North American police, sleep disorders have been associated with increased risk of mental health outcomes, including depression and anxiety, and EE and DP burnout dimensions.<sup>3</sup> In addition to sleep, other work-related factors may also have a negative influence on the health of personnel engaged in shift work, however, few studies have examined how specific characteristics of shift work impact burnout in police.

Police have traditionally worked 8- to 10-hour shifts, although increasingly, departments are implementing compressed weekly schedules which involve officers working 11-, 12- and 16-hour shifts.<sup>1 3</sup> Long shifts are related to increased sleepiness<sup>8</sup> and may reduce the opportunity for sleep, potentially impairing police officers' ability to recover from work demands.<sup>9</sup> Short sleep has been found to associate with burnout in shift working occupations,<sup>10</sup> including law enforcement,<sup>11</sup> although few studies have examined the impact of sleepiness on burnout specifically in police. Recovery between shifts may be further restricted by night work, which can cause sleep loss and circadian misalignment, and is shown in other healthcare occupations to confer a greater risk of burnout when compared to day shifts.<sup>10</sup> A high degree of burnout has also been associated with working more night shifts among physicians,<sup>12</sup> and

1  
2  
3 longer duration shifts and work weeks in nurses<sup>13 14</sup> and emergency medical technicians  
4  
5 (EMTs).<sup>15</sup> Although hours of work were not significantly associated with burnout in resident  
6  
7 physicians, burnout was related to increased difficulty concentrating on work.<sup>16</sup> In police,  
8  
9 officers who were continuously engaged in shift work were reported to have lower PA, but  
10  
11 this study did not describe the relationship between regular shift work and EE or DP, nor did  
12  
13 it distinguish between the different *shift types* in policing,<sup>19</sup> such as night and long duration  
14  
15 shifts. Furthermore, police also work a variety of different schedules including irregular,  
16  
17 rotating and fixed shifts,<sup>9</sup> and often do overtime which may be associated with burnout<sup>17</sup> but  
18  
19 to date, the effect of work schedules and shift characteristics on burnout has not been  
20  
21 systematically examined in police.  
22  
23  
24  
25  
26  
27  
28

29 In this cross-sectional study, we examined whether characteristics of shifts (night, shift  
30  
31 duration, frequency, weekly work and overtime hours) as well as shift schedules (irregular,  
32  
33 rotating, fixed) were associated with burnout in police. Given that short sleep and sleepiness  
34  
35 are also common stressors among police and potential consequences of shift work,<sup>3</sup> a  
36  
37 secondary aim was to investigate associations between sleep duration and sleepiness on  
38  
39 burnout risk in police.  
40  
41  
42  
43

## 44 **METHODS**

### 45 ***Participants***

46  
47  
48  
49 Volunteers were invited to participate through meetings at police departments and  
50  
51 advertisements in police magazines, newsletters and on police-focused websites. In total,  
52  
53 6022 sworn North American police officers expressed interest in the study. Of those, 4957  
54  
55 consented to participate in a survey, either online or, in a few departments, on-site (via  
56  
57 pencil/paper). Participant recruitment and survey administration details have been described  
58  
59  
60

1  
2  
3 previously.<sup>3</sup> The survey assessed demographics and health information and participants  
4 reported work and sleep hours in the past 4 weeks and completed the Maslach Burnout  
5 Inventory (MBI). Of the 4957 officers who participated, 3140 completed at least one burnout  
6 dimension subscale in the MBI and were eligible for analyses. All participants provided  
7 informed consent and were eligible for a prize drawing valued up to \$1000 USD.  
8  
9  
10  
11  
12  
13  
14  
15  
16

### 17 *Measures*

18  
19 Burnout was assessed using the MBI–Human Services Survey,<sup>4</sup> which consists of 22 items  
20 that assess the three burnout dimensions: EE, DP, and PA. Participants rated the frequency  
21 with which they experienced each item on a 7-point Likert scale (0=never; 6=everyday). EE  
22 and DP were defined as dichotomous variables, in which a high or low-moderate risk score  
23 were determined (high EE  $\geq 27$  points; high DP  $\geq 13$  points). PA was defined as either high-  
24 moderate or low ( $\geq 39$  points). Participants were considered to have high *overall burnout* if  
25 they had both high EE and DP, with or without low PA.<sup>16 18</sup>  
26  
27  
28  
29  
30  
31  
32  
33  
34  
35  
36  
37

38 Work information was determined using items from both the baseline and a concurrent  
39 monthly report. Participants were asked how frequently they worked night shifts (shifts  
40 involving  $\geq 6$  hours on-duty between 10PM-8AM), with responses from “never or nearly  
41 never”, “1-2 times per month”, “3-4 times per month”, “1-2 times per week”, “3-4 times per  
42 week” and “nearly every day”. To determine the frequency of long work shifts, participants  
43 reported the shift length they worked each week for the previous 4 weeks (i.e., 8-10, 11-15,  
44 16-19, 20-23 or  $\geq 24$  hours). Based on previous research in human service occupations,<sup>14</sup> *long*  
45 *work shifts* were classified as  $\geq 11$  hours, from which officers were grouped into those  
46 working 0,  $>0$  to  $<2$ ,  $\geq 2$  to  $<4$ , and  $\geq 4$  long shifts per week.  
47  
48  
49  
50  
51  
52  
53  
54  
55  
56  
57  
58  
59  
60



1  
2  
3 Participants' usual shift schedules were categorized as 'fixed', 'irregular', 'rotating' or  
4  
5 'other' schedules. Participants reporting that they "do not have a variable work schedule"  
6  
7 were classified as having 'fixed' schedules. Schedules were categorized as 'rotating' if  
8  
9 officers reported working shifts that rotated on a day-to-evening, day-to-night or evening-to-  
10  
11 night basis. Irregular schedules were defined as shifts that rotated, but did not follow a  
12  
13 consistent pattern, and 'other' comprised schedules that included non-day-to-day rotations  
14  
15 (e.g., weekly/monthly rotations). Total work hours across the month were recorded using a  
16  
17 validated questionnaire,<sup>19</sup> with those recording  $\geq 48$  hours per week considered to be working  
18  
19 *long work weeks*. Participants also recorded if they completed mandatory and/or voluntary  
20  
21 overtime over the last 4 weeks, and the total number of hours they slept each week for the  
22  
23 previous 4 weeks. For sleep duration, the combined total of the 4 weeks was used to calculate  
24  
25 the average sleep duration per 24 hours, and short sleep was defined as  $< 6$  hours sleep per 24  
26  
27 hours. Daytime sleepiness was measured using the Epworth Sleepiness Scale (ESS; range 0-  
28  
29 24), and a score  $\geq 11$  indicated excessive sleepiness.<sup>20</sup>

### 36 37 **Statistical analysis**

38  
39 Multiple logistic regression models were used for cross-sectional analysis of associations  
40  
41 between shift work (shift work characteristics and schedules), sleep duration, sleepiness and  
42  
43 burnout (Overall burnout, EE, DP, PA). The models were adjusted for age, Body Mass Index  
44  
45 (BMI), gender, marital status, hypertension, exercise (per week), cigarette smoking (yes/no),  
46  
47 caffeine and alcohol consumption (yes/no during last week), primary police activity (patrol  
48  
49 officer, supervisor/manager, detective), years as police officer, and seniority. These  
50  
51 potentially confounding factors were selected based on prior studies.<sup>3 21-24</sup> Each confounder  
52  
53 was tested individually with the burnout outcome, and we only included those that were  
54  
55 significant ( $p < 0.10$ ) in initial models. A backward elimination method was used to remove  
56  
57  
58  
59  
60

1  
2  
3 those that were not significant in the final model. Unadjusted and adjusted odds ratio with  
4  
5 95% Confidence Intervals (CI) are reported. Statistical analyses were conducted using SPSS  
6  
7 (IBM Corp, Version 24.0, Armonk, NY) and significance set at  $p < 0.05$ .  
8  
9

### 10 11 12 **Patient and public involvement**

13  
14 The current study was based on secondary data from a pre-existing data set. Therefore,  
15  
16 patients and the general public were not involved in the development of the research  
17  
18 questions, outcome measures or design of the study.  
19  
20  
21

### 22 23 24 **RESULTS**

25  
26 Police officers were aged  $38.5 \pm 8.3$  (mean  $\pm$  SD) years and had  $12.7 \pm 8.2$  years of  
27  
28 experience in law enforcement. Female officers (16.7%) in our sample were slightly over-  
29  
30 represented compared to police in North America (12.2%).<sup>25</sup> The sample was predominantly  
31  
32 white (Table 1), with racial and ethnic minority groups slightly under-represented compared  
33  
34 to national police statistics.<sup>25</sup> The prevalence of overweight or obesity based on BMI were  
35  
36 over-represented in the sample (80%) (Table 1) compared to general population data (70%).<sup>26</sup>  
37  
38 Overall burnout was found in 17.7% of police. High EE and high DP were observed in 23.8%  
39  
40 and 42.6% of the sample respectively, and low PA was observed in 24.1%. In the last month,  
41  
42 56.7% of police worked  $\geq 1$  night shift, 63.9% worked  $\geq 1$  long shift, and 41.2% had an  
43  
44 irregular or rotating schedule. Mean total work hours were  $192.27 \pm 74.82$  hours per month,  
45  
46 mean mandatory overtime was  $8.26 \pm 14.14$  hours per month, and mean voluntary overtime  
47  
48 was  $12.98 \pm 19.83$  hours per month. Short sleep duration was observed in 30.4% of police,  
49  
50 and 25.8% had excessive sleepiness (Table 1).  
51  
52  
53  
54  
55  
56  
57  
58  
59  
60

**Table 1.** Participant characteristics

| Characteristic                               | Data          |
|----------------------------------------------|---------------|
| n                                            | 3140          |
| Age, mean (SD) y                             | 38.48 (8.31)  |
| Gender, n (%)                                |               |
| Male                                         | 2609 (83.3)   |
| Female                                       | 523 (16.7)    |
| Not known                                    | 8 (0.3)       |
| Body Mass Index, n (%)                       |               |
| < 25 kg/m <sup>2</sup>                       | 610 (19.4)    |
| ≥ 25 and < 30 kg/m <sup>2</sup>              | 1460 (46.5)   |
| ≥ 30 and < 35 kg/m <sup>2</sup>              | 781 (24.9)    |
| ≥ 35 kg/m <sup>2</sup>                       | 271 (8.6)     |
| Not known                                    | 18 (0.6)      |
| Race, n (%)                                  |               |
| White                                        | 2681 (85.4)   |
| Black                                        | 257 (8.2)     |
| Asian                                        | 34 (1.1)      |
| Native American                              | 21 (0.7)      |
| Pacific Islander                             | 1 (0.03)      |
| Other                                        | 100 (3.2)     |
| Not known                                    | 46 (1.5)      |
| Ethnicity, n (%)                             |               |
| Hispanic                                     | 162 (5.2)     |
| Other                                        | 2806 (89.4)   |
| Not known                                    | 172 (5.5)     |
| Overtime hours per month, mean (SD)          |               |
| Mandatory                                    | 8.26 (14.14)  |
| Voluntary                                    | 12.98 (19.83) |
| Total                                        | 20.50 (24.62) |
| Night shift frequency, n (%)                 |               |
| Never or nearly never                        | 1290 (41.1)   |
| 1-4 per week                                 | 612 (19.5)    |
| 1-4 per month                                | 584 (18.6)    |
| Nearly every day                             | 615 (19.6)    |
| Not known                                    | 39 (1.2)      |
| Long work shifts per week (≥11 hours), n (%) |               |
| None                                         | 390 (12.4)    |
| >0 - <2                                      | 1029 (32.8)   |
| ≥2 - <4                                      | 496 (15.8)    |
| ≥4                                           | 482 (15.4)    |
| Not known                                    | 743 (23.7)    |
| Work hours per week, n (%)                   |               |
| <48 hours                                    | 1820 (58.0)   |
| ≥48 hours                                    | 1260 (40.1)   |
| Not known                                    | 60 (1.9)      |

**Table 1. Continued.**

| Characteristic                                                  | Data        |
|-----------------------------------------------------------------|-------------|
| Usual shift schedule, n (%)                                     |             |
| Fixed                                                           | 1822 (58.0) |
| Irregular                                                       | 274 (8.7)   |
| Rotating                                                        | 782 (24.9)  |
| Other                                                           | 239 (7.6)   |
| Not known                                                       | 23 (0.7)    |
| Average sleep duration over the last 4 weeks*, n (%)            |             |
| <6 h                                                            | 956 (30.4)  |
| ≥6 h                                                            | 1780 (56.7) |
| Not known                                                       | 404 (12.9)  |
| Daytime sleepiness, n (%)                                       |             |
| Normal (<11 ESS) daytime sleepiness                             | 2195 (69.9) |
| Excessive (≥11 ESS) daytime sleepiness                          | 809 (25.8)  |
| Not known                                                       | 136 (4.3)   |
| Burnout, n‡ (%)                                                 |             |
| High EE                                                         | 747 (23.8)  |
| High DP                                                         | 1338 (42.6) |
| Low PA                                                          | 758 (24.1)  |
| Overall burnout†                                                | 556 (17.7)  |
| Police officers that had at least 1 dimension of burnout, n (%) |             |
| No                                                              | 1082 (34.5) |
| Yes                                                             | 2058 (65.5) |

\*per 24-hour period; †defined as high EE, high DP, with or without low PA; ‡The burnout characteristics are not mutually exclusive (e.g., a participant could have both high EE and Low PA); EE, emotional exhaustion; DP, depersonalisation; PA, personal accomplishment; ESS, Epworth Sleepiness Scale; SD, standard deviation.

### ***Shift characteristics and burnout***

The odds of high EE increased in a dose-response manner as a function of the number of long shifts worked per week, with police completing  $\geq 4$  long shifts per week having the greatest risk (adjusted odds ratio 1.91, 95% CI 1.35-2.72), compared to no long shifts. A similar relationship was demonstrated for overall burnout, with police working  $>0$  to  $<2$  and  $\geq 4$  long shifts per week more likely to have overall burnout (1.44, 95% CI 1.02-2.02 and 1.78, 95% CI 1.21-2.61, respectively) compared to no long shifts. Police working long shifts were also more likely to have low PA compared to no long shifts (Table 2); even one long shift per month increased the risk of burnout (1.4- to 1.5-fold increase; Table S5). Working  $\geq 48$  hours per week was associated with an increased risk of low PA (1.33, 95% CI 1.12-1.58) compared to shorter weeks, but not overall burnout or EE. Neither long shift frequency nor weekly work hours were related to DP. Compared to police who never/nearly never work night shifts, those working night shifts nearly every day were at an increased risk of high DP (1.32, 95% CI 1.05-1.66). Police reporting mandatory overtime had an increased risk of overall burnout (1.40, 95% CI 1.14-1.71), high EE (1.37, 95% CI 1.14-1.65) and DP (1.30, 95% CI 1.10-1.53), whereas voluntary overtime was only associated with high DP (1.18, 95% CI 1.01-1.39). Reporting any overtime (mandatory or voluntary) was also associated with overall burnout (1.36, 95% CI 1.06-1.75) and high DP (1.47, 95% CI 1.21-1.80). Overtime was not related to PA.

### ***Work schedules and burnout***

Police working irregular schedules were at greatest risk of overall burnout (2.12, 95% CI 1.57-2.85), followed by high EE (1.91, 95% CI 1.44-2.54), and high DP (1.39, 95% CI 1.02-1.89) compared to those working fixed schedules. Compared to fixed schedules, police reporting rotating and 'other' schedules were more likely to have EE (1.30, 95% CI 1.06-1.59

1  
2  
3 and 1.44, 95% CI 1.05-1.98, respectively), but these associations were weaker than those  
4  
5 observed for irregular shifts. Furthermore, police working rotating schedules were less likely  
6  
7 to have low PA (0.74, 95% CI 0.59-0.91) compared to fixed shifts. Rotating or 'other'  
8  
9 schedules were not associated with overall burnout or DP, and irregular or 'other' shift  
10  
11 schedules were not related to PA (Table 3).  
12  
13  
14  
15  
16  
17  
18  
19  
20  
21  
22  
23  
24  
25  
26  
27  
28  
29  
30  
31  
32  
33  
34  
35  
36  
37  
38  
39  
40  
41  
42  
43  
44  
45  
46  
47  
48  
49  
50  
51  
52  
53  
54  
55  
56  
57  
58  
59  
60

For peer review only

1  
2 **Table 2.** High burnout outcomes associated with shift work characteristics in police (n=3140)

| Shift work characteristic, n <sup>†</sup> | Positive result in police with burnout, No./No. total (%) |                  | Unadjusted         |                 | Adjusted <sup>¶</sup> |         |
|-------------------------------------------|-----------------------------------------------------------|------------------|--------------------|-----------------|-----------------------|---------|
|                                           |                                                           |                  | OR (95% CI)        | P Value         | OR (95% CI)           | P Value |
|                                           |                                                           |                  | High EE            | Low-moderate EE |                       |         |
| Night shift frequency                     |                                                           |                  |                    |                 |                       |         |
| Never/nearly never                        | 290/734 (39.5)                                            | 935/2220 (42.1)  |                    |                 |                       |         |
| 1-4 per month                             | 154/734 (21.0)                                            | 435/2220 (19.6)  | 1.14 (0.91 - 1.43) | 0.252           | 1.13 (0.90 - 1.43)    | 0.292   |
| 1-4 per week                              | 141/734 (19.2)                                            | 411/2220 (18.5)  | 1.11 (0.88 - 1.40) | 0.395           | 1.06 (0.84 - 1.35)    | 0.628   |
| Nearly every day                          | 149/734 (20.3)                                            | 439/2220 (19.8)  | 1.09 (0.87 - 1.37) | 0.438           | 1.12 (0.88 - 1.41)    | 0.363   |
| n                                         | 2954                                                      |                  |                    |                 |                       |         |
| Long work shifts per week (≥11 hours)     |                                                           |                  |                    |                 |                       |         |
| 0                                         | 69/575 (12.0)                                             | 296/1719 (17.2)  |                    |                 |                       |         |
| >0 - <2                                   | 255/575 (44.3)                                            | 732/1719 (42.6)  | 1.49 (1.11 - 2.01) | 0.008           | 1.48 (1.09 - 2.02)    | 0.013   |
| ≥2 - <4                                   | 123/575 (21.4)                                            | 355/1719 (20.7)  | 1.49 (1.07 - 2.07) | 0.020           | 1.49 (1.05 - 2.11)    | 0.024   |
| ≥4                                        | 128/575 (22.3)                                            | 336/1719 (19.5)  | 1.63 (1.17 - 2.28) | 0.004           | 1.91 (1.35 - 2.72)    | <0.001  |
| n                                         | 2294                                                      |                  |                    |                 |                       |         |
| Long work weeks                           |                                                           |                  |                    |                 |                       |         |
| <48 hours                                 | 417/731 (40.9)                                            | 1303/2204 (59.1) |                    |                 |                       |         |
| ≥48 hours                                 | 314/731 (43.0)                                            | 901/2204 (40.9)  | 1.09 (0.92 - 1.29) | 0.324           | 1.14 (0.96 - 1.36)    | 0.141   |
| n                                         | 2935                                                      |                  |                    |                 |                       |         |
| Mandatory overtime                        |                                                           |                  |                    |                 |                       |         |
| No                                        | 305/653 (46.7)                                            | 1056/1911 (55.3) |                    |                 |                       |         |
| Yes                                       | 348/653 (53.3)                                            | 855/1911 (44.7)  | 1.41 (1.18 - 1.68) | <0.001          | 1.37 (1.14 - 1.65)    | 0.001   |
| n                                         | 2564                                                      |                  |                    |                 |                       |         |
| Voluntary overtime                        |                                                           |                  |                    |                 |                       |         |
| No                                        | 306/646 (47.4)                                            | 881/1935 (45.5)  |                    |                 |                       |         |
| Yes                                       | 340/646 (52.6)                                            | 1054/1935 (54.5) | 0.93 (0.78 - 1.11) | 0.417           | 0.94 (0.78 - 1.12)    | 0.475   |
| n                                         | 2581                                                      |                  |                    |                 |                       |         |
| Any overtime (Mandatory or voluntary)     |                                                           |                  |                    |                 |                       |         |
| No                                        | 143/618 (23.1)                                            | 487/1799 (27.1)  |                    |                 |                       |         |
| Yes                                       | 475/618 (76.9)                                            | 1312/1799 (72.9) | 1.23 (1.00 - 1.53) | 0.055           | 1.21 (0.97 - 1.50)    | 0.095   |
| n                                         | 2417                                                      |                  |                    |                 |                       |         |
|                                           | High DP                                                   | Low-moderate DP  |                    |                 |                       |         |
| Night shift frequency                     |                                                           |                  |                    |                 |                       |         |
| Never/nearly never                        | 481/1320 (36.4)                                           | 771/1700 (45.4)  |                    |                 |                       |         |
| 1-4 per month                             | 285/1320 (21.6)                                           | 316/1700 (18.6)  | 1.45 (1.19 - 1.76) | <0.001          | 1.21 (0.96 - 1.51)    | 0.101   |
| 1-4 per week                              | 254/1320 (19.2)                                           | 314/1700 (18.5)  | 1.30 (1.06 - 1.86) | 0.011           | 1.07 (0.84 - 1.35)    | 0.592   |
| Nearly every day                          | 300/1320 (22.7)                                           | 299/1700 (17.6)  | 1.61 (1.32 - 1.96) | <0.001          | 1.32 (1.05 - 1.66)    | 0.018   |
| n                                         | 3020                                                      |                  |                    |                 |                       |         |
| Long work shifts per week (≥11 hours)     |                                                           |                  |                    |                 |                       |         |
| 0                                         | 151/1027 (14.7)                                           | 226/1316 (17.2)  |                    |                 |                       |         |
| >0 - <2                                   | 476/1027 (46.3)                                           | 535/1316 (40.7)  | 1.33 (1.05 - 1.69) | 0.019           | 1.20 (0.93 - 1.54)    | 0.157   |
| ≥2 - <4                                   | 218/1027 (21.2)                                           | 268/1316 (20.4)  | 1.22 (0.93 - 1.60) | 0.157           | 1.09 (0.81 - 1.45)    | 0.578   |
| ≥4                                        | 182/1027 (17.7)                                           | 287/1316 (21.8)  | 0.95 (0.72 - 1.25) | 0.712           | 0.96 (0.71 - 1.29)    | 0.804   |
| n                                         | 2343                                                      |                  |                    |                 |                       |         |
| Long work weeks                           |                                                           |                  |                    |                 |                       |         |
| <48 hours                                 | 789/1325 (59.5)                                           | 976/1674 (58.3)  |                    |                 |                       |         |
| ≥48 hours                                 | 536/1325 (40.5)                                           | 698/1674 (41.7)  | 0.95 (0.82 - 1.10) | 0.492           | 0.98 (0.83 - 1.15)    | 0.779   |
| n                                         | 2999                                                      |                  |                    |                 |                       |         |
| Mandatory overtime                        |                                                           |                  |                    |                 |                       |         |
| No                                        | 568/1199 (47.4)                                           | 814/1424 (57.2)  |                    |                 |                       |         |
| Yes                                       | 631/1199 (52.6)                                           | 610/1424 (42.8)  | 1.48 (1.27 - 1.73) | <0.001          | 1.30 (1.10 - 1.53)    | 0.002   |
| n                                         | 2623                                                      |                  |                    |                 |                       |         |
| Voluntary overtime                        |                                                           |                  |                    |                 |                       |         |
| No                                        | 521/1196 (43.6)                                           | 694/1444 (48.1)  |                    |                 |                       |         |
| Yes                                       | 675/1196 (56.4)                                           | 750/1444 (51.9)  | 1.20 (1.03 - 1.40) | 0.021           | 1.18 (1.01 - 1.39)    | 0.042   |
| n                                         | 2640                                                      |                  |                    |                 |                       |         |
| Any overtime (Mandatory or voluntary)     |                                                           |                  |                    |                 |                       |         |
| No                                        | 235/1130 (20.8)                                           | 406/1345 (30.2)  |                    |                 |                       |         |
| Yes                                       | 895/1130 (79.2)                                           | 939/1345 (69.8)  | 1.65 (1.37 - 1.98) | <0.001          | 1.47 (1.21 - 1.80)    | <0.001  |
| n                                         | 2475                                                      |                  |                    |                 |                       |         |

Table 2. Continued

| Shift work characteristic, n <sup>†,‡</sup> | Positive result in police with high burnout, No./No. total (%) |                    | Unadjusted         |         | Adjusted <sup>¶</sup> |         |
|---------------------------------------------|----------------------------------------------------------------|--------------------|--------------------|---------|-----------------------|---------|
|                                             | Low PA                                                         | Moderate-high PA   | OR (95% CI)        | P Value | OR (95% CI)           | P Value |
| Night shift frequency                       |                                                                |                    |                    |         |                       |         |
| Never/nearly never                          | 313/752 (41.6)                                                 | 895/2181 (41.0)    |                    |         |                       |         |
| 1-4 per month                               | 146/752 (19.4)                                                 | 430/2181 (19.7)    | 0.97 (0.77 - 1.22) | 0.799   | 0.98 (0.78 - 1.24)    | 0.874   |
| 1-4 per week                                | 150/752 (19.9)                                                 | 411/2181 (18.8)    | 1.04 (0.83 - 1.31) | 0.713   | 1.10 (0.87 - 1.39)    | 0.426   |
| Nearly every day                            | 143/752 (18.9)                                                 | 445/2181 (20.4)    | 0.92 (0.73 - 1.15) | 0.467   | 1.01 (0.80 - 1.28)    | 0.936   |
| n                                           |                                                                | 2933               |                    |         |                       |         |
| Long work shifts per week (≥11 hours)       |                                                                |                    |                    |         |                       |         |
| 0                                           | 76/591 (12.9)                                                  | 292/1685 (17.3)    |                    |         |                       |         |
| >0 - <2                                     | 250/591 (42.3)                                                 | 733/1685 (43.5)    | 1.31 (0.98 - 1.75) | 0.068   | 1.27 (0.95 - 1.71)    | 0.114   |
| ≥2 - <4                                     | 133/591 (22.5)                                                 | 340/1685 (20.2)    | 1.50 (1.09 - 2.08) | 0.013   | 1.46 (1.05 - 2.03)    | 0.024   |
| ≥4                                          | 132/591 (22.3)                                                 | 320/1685 (19.0)    | 1.59 (1.15 - 2.19) | 0.005   | 1.43 (1.02 - 1.99)    | 0.036   |
| n                                           |                                                                | 2276               |                    |         |                       |         |
| Long work weeks                             |                                                                |                    |                    |         |                       |         |
| <48 hours                                   | 399/750 (53.2)                                                 | 1323/2168 (61.0)   |                    |         |                       |         |
| ≥48 hours                                   | 351/750 (46.8)                                                 | 845/2168 (39.0)    | 1.38 (1.17 - 1.63) | <0.001  | 1.33 (1.12 - 1.58)    | 0.001   |
| n                                           |                                                                | 2918               |                    |         |                       |         |
| Mandatory overtime                          |                                                                |                    |                    |         |                       |         |
| No                                          | 370/653 (56.7)                                                 | 973/1902 (51.2)    |                    |         |                       |         |
| Yes                                         | 283/653 (43.3)                                                 | 929/1902 (48.8)    | 0.80 (0.67 - 0.96) | 0.015   | 0.85 (0.71 - 1.02)    | 0.075   |
| n                                           |                                                                | 2555               |                    |         |                       |         |
| Voluntary overtime                          |                                                                |                    |                    |         |                       |         |
| No                                          | 298/672 (44.3)                                                 | 886/1899 (46.7)    |                    |         |                       |         |
| Yes                                         | 374/672 (55.7)                                                 | 1013/1899 (53.3)   | 1.01 (0.92 - 1.31) | 0.302   | 1.08 (0.90 - 1.29)    | 0.418   |
| n                                           |                                                                | 2571               |                    |         |                       |         |
| Any overtime (Mandatory or voluntary)       |                                                                |                    |                    |         |                       |         |
| No                                          | 164/623 (26.3)                                                 | 456/1786 (25.5)    |                    |         |                       |         |
| Yes                                         | 459/623 (73.7)                                                 | 1130/1786 (74.5)   | 0.96 (0.78 - 1.18) | 0.697   | 1.04 (0.84 - 1.29)    | 0.728   |
| n                                           |                                                                | 2409               |                    |         |                       |         |
|                                             | Overall burnout                                                | No overall burnout |                    |         |                       |         |
| Night shift frequency                       |                                                                |                    |                    |         |                       |         |
| Never/nearly never                          | 202/545 (37.1)                                                 | 1085/2547 (42.6)   |                    |         |                       |         |
| 1-4 per month                               | 121/545 (22.2)                                                 | 489/2547 (19.2)    | 1.32 (1.04 - 1.71) | 0.025   | 1.25 (0.97 - 1.61)    | 0.092   |
| 1-4 per week                                | 110/545 (20.2)                                                 | 473/2547 (18.6)    | 1.25 (0.97 - 1.61) | 0.089   | 1.11 (0.85 - 1.14)    | 0.449   |
| Nearly every day                            | 112/545 (20.6)                                                 | 500/2547 (19.6)    | 1.20 (0.93 - 1.55) | 0.154   | 1.12 (0.86 - 1.45)    | 0.407   |
| n                                           |                                                                | 3092               |                    |         |                       |         |
| Long work shifts per week (≥11 hours)       |                                                                |                    |                    |         |                       |         |
| 0                                           | 51/426 (12.0)                                                  | 338/1967 (17.2)    |                    |         |                       |         |
| >0 - <2                                     | 191/426 (44.8)                                                 | 835/1967 (42.5)    | 1.52 (1.09 - 2.12) | 0.015   | 1.44 (1.02 - 2.02)    | 0.038   |
| ≥2 - <4                                     | 88/426 (20.7)                                                  | 408/1967 (20.7)    | 1.43 (0.98 - 2.08) | 0.061   | 1.36 (0.93 - 2.00)    | 0.116   |
| ≥4                                          | 96/426 (22.5)                                                  | 386/1967 (19.6)    | 1.65 (1.14 - 2.39) | 0.008   | 1.78 (1.21 - 2.61)    | 0.003   |
| n                                           |                                                                | 2393               |                    |         |                       |         |
| Long work weeks                             |                                                                |                    |                    |         |                       |         |
| <48 hours                                   | 309/547 (56.5)                                                 | 1503/2524 (59.5)   |                    |         |                       |         |
| ≥48 hours                                   | 238/547 (43.5)                                                 | 1021/2524 (40.5)   | 1.13 (0.94 - 1.37) | 0.188   | 1.13 (0.94 - 1.37)    | 0.201   |
| n                                           |                                                                | 3071               |                    |         |                       |         |
| Mandatory overtime                          |                                                                |                    |                    |         |                       |         |
| No                                          | 222/496 (44.8)                                                 | 1196/2178 (54.9)   |                    |         |                       |         |
| Yes                                         | 274/496 (55.2)                                                 | 982/2178 (45.1)    | 1.50 (1.24 - 1.83) | <0.001  | 1.40 (1.14 - 1.71)    | 0.001   |
| n                                           |                                                                | 2674               |                    |         |                       |         |
| Voluntary overtime                          |                                                                |                    |                    |         |                       |         |
| No                                          | 225/489 (46.0)                                                 | 1016/2201 (46.2)   |                    |         |                       |         |
| Yes                                         | 264/489 (54.0)                                                 | 1185/2201 (53.8)   | 1.01 (0.83 - 1.23) | 0.952   | 1.01 (0.83 - 1.24)    | 0.910   |
| n                                           |                                                                | 2690               |                    |         |                       |         |
| Any overtime (Mandatory or voluntary)       |                                                                |                    |                    |         |                       |         |
| No                                          | 97/471 (20.6)                                                  | 564/2048 (27.5)    |                    |         |                       |         |
| Yes                                         | 374/471 (79.4)                                                 | 1484/2048 (72.5)   | 1.56 (1.31 - 1.87) | <0.001  | 1.36 (1.06 - 1.75)    | 0.017   |
| n                                           |                                                                | 2519               |                    |         |                       |         |



1  
2 EE, emotional exhaustion; DP, depersonalisation; PA, personal accomplishment; OR, odds ratio; CI, confidence  
3 interval; †The *n* presented represents the sample for each unadjusted analysis. The *n* for the adjusted analyses are in  
4 Supplement 1, Table S2; ‡Some participants did not provide sufficient information from which to determine their  
5 shift work characteristics. The *n* presented are from those who answered sufficiently; ¶Adjusted for age, BMI, gender,  
6 marital status, hypertension, cigarette use, caffeine use, alcohol, second job, primary activity, years as police officer,  
7 exercise frequency, and seniority. Variables included in each model are in Supplement 1, Table S2.  
8  
9  
10  
11  
12  
13  
14  
15  
16  
17  
18  
19  
20  
21  
22  
23  
24  
25  
26  
27  
28  
29  
30  
31  
32  
33  
34  
35  
36  
37  
38  
39  
40  
41  
42  
43  
44  
45  
46  
47  
48  
49  
50  
51  
52  
53  
54  
55  
56  
57  
58  
59  
60

For peer review only

**Table 3.** High burnout outcomes associated with shift work schedules in police (n=3140)

| Shift work schedule, n <sup>†,‡</sup> | Positive result in police with high burnout, No./No. total (%) |                    | Unadjusted         |         | Adjusted <sup>¶</sup> |         |
|---------------------------------------|----------------------------------------------------------------|--------------------|--------------------|---------|-----------------------|---------|
|                                       |                                                                |                    | OR (95% CI)        | P Value | OR (95% CI)           | P Value |
|                                       | High EE                                                        | Low-moderate EE    |                    |         |                       |         |
| Fixed                                 | 382/743 (51.4)                                                 | 1366/2227 (61.3)   |                    |         |                       |         |
| Irregular                             | 96/743 (12.9)                                                  | 168/2227 (7.5)     | 2.04 (1.55 - 2.69) | <0.001  | 1.91 (1.44 - 2.54)    | <0.001  |
| Rotating                              | 200/743 (26.9)                                                 | 534/2227 (24.0)    | 1.34 (1.10 - 1.63) | 0.004   | 1.30 (1.06 - 1.59)    | 0.011   |
| Other                                 | 65/743 (8.7)                                                   | 159/2227 (7.1)     | 1.46 (1.07 - 1.99) | 0.016   | 1.44 (1.05 - 1.98)    | 0.024   |
| n                                     | 2970                                                           |                    |                    |         |                       |         |
|                                       | High DP                                                        | Low-moderate DP    |                    |         |                       |         |
| Fixed                                 | 740/1331 (55.6)                                                | 1038/1703 (61.0)   |                    |         |                       |         |
| Irregular                             | 146/1331 (11.0)                                                | 117/1703 (6.9)     | 1.75 (1.35 - 2.27) | <0.001  | 1.39 (1.02 - 1.89)    | 0.038   |
| Rotating                              | 343/1331 (25.8)                                                | 416/1703 (24.4)    | 1.16 (0.96 - 1.37) | 0.096   | 0.97 (0.80 - 1.18)    | 0.830   |
| Other                                 | 102/1331 (7.7)                                                 | 132/1703 (7.8)     | 1.08 (0.82 - 1.43) | 0.566   | 1.07 (0.78 - 1.45)    | 0.665   |
| n                                     | 3034                                                           |                    |                    |         |                       |         |
|                                       | Low PA                                                         | Moderate-high PA   |                    |         |                       |         |
| Fixed                                 | 481/754 (63.8)                                                 | 1244/2196 (56.6)   |                    |         |                       |         |
| Irregular                             | 73/754 (9.7)                                                   | 192/2196 (8.7)     | 0.98 (0.74 - 1.31) | 0.909   | 1.02 (0.76 - 1.36)    | 0.919   |
| Rotating                              | 152/754 (20.2)                                                 | 584/2196 (26.6)    | 0.67 (0.55 - 0.83) | <0.001  | 0.74 (0.59 - 0.91)    | 0.004   |
| Other                                 | 48/754 (6.4)                                                   | 176/2196 (8.0)     | 0.71 (0.50 - 0.99) | 0.042   | 0.73 (0.52 - 1.02)    | 0.068   |
| n                                     | 2950                                                           |                    |                    |         |                       |         |
|                                       | Overall burnout                                                | No overall burnout |                    |         |                       |         |
| Fixed                                 | 279/553 (50.5)                                                 | 1539/2555 (60.2)   |                    |         |                       |         |
| Irregular                             | 82/553 (14.8)                                                  | 192/2555 (7.5)     | 2.36 (1.77 - 3.14) | <0.001  | 2.12 (1.57 - 2.85)    | <0.001  |
| Rotating                              | 146/553 (26.4)                                                 | 632/2555 (24.7)    | 1.27 (1.02 - 1.59) | 0.031   | 1.24 (0.99 - 1.56)    | 0.065   |
| Other                                 | 46/553 (8.3)                                                   | 192/2555 (7.5)     | 1.32 (0.94 - 1.87) | 0.114   | 1.29 (0.91 - 1.84)    | 0.153   |
| n                                     | 3108                                                           |                    |                    |         |                       |         |

EE, emotional exhaustion; DP, depersonalisation; PA, personal accomplishment; OR, odds ratio; CI, confidence interval; <sup>†</sup>The *n* presented represents the sample for each unadjusted analysis. The *n* for the adjusted analyses are in Supplement 1, Table S2; <sup>‡</sup>Some participants did not provide sufficient information from which to determine their shift work schedule. The *n* presented are from those who answered sufficiently; <sup>¶</sup>Adjusted for age, BMI, gender, marital status, hypertension, cigarette use, caffeine use, alcohol use, second job, primary activity, years as police officer, exercise frequency, and seniority. Variables included in each model are in Supplement 1, Table S2.

### *Sleep and burnout*

Police who reported, on average, short sleep (<6 hours) were more likely to have overall burnout (1.49, 95% CI 1.21-1.81) and high EE (1.60, 95% CI 1.33-1.93) compared to those sleeping  $\geq$ 6 hours. Short sleep was not associated with DP or PA (Table 4). Police with excessive sleepiness were more likely to have overall burnout (1.72, 95% CI 1.41-2.11), high EE (1.81, 95% CI 1.50-2.18), high DP (1.48, 95% CI 1.23-1.78) and less likely to have low PA (0.77, 95% CI 0.63-0.94) compared to police with normal sleepiness.

**Table 4.** High burnout outcomes associated with sleep duration and sleepiness in police (n=3140)

| Sleep characteristics, n <sup>†,‡</sup> | Positive result in police with high burnout, No./No. total (%) |                    | Unadjusted         |         | Adjusted <sup>¶</sup> |         |
|-----------------------------------------|----------------------------------------------------------------|--------------------|--------------------|---------|-----------------------|---------|
|                                         | High EE                                                        | Low-moderate EE    | OR (95% CI)        | P Value | OR (95% CI)           | P Value |
|                                         | High EE                                                        | Low-moderate EE    |                    |         |                       |         |
| Sleep duration                          |                                                                |                    |                    |         |                       |         |
| ≥6 hours per night                      | 371/654 (56.7)                                                 | 1334/1956 (68.2)   |                    |         |                       |         |
| <6 hours per night                      | 283/654 (43.3)                                                 | 622/1956 (31.8)    | 1.64 (1.36 - 1.96) | <0.001  | 1.60 (1.33 - 1.93)    | <0.001  |
| n                                       |                                                                | 2610               |                    |         |                       |         |
| Sleepiness                              |                                                                |                    |                    |         |                       |         |
| <11 ESS                                 | 451/714 (63.2)                                                 | 1652/2158 (76.6)   |                    |         |                       |         |
| ≥11 ESS                                 | 263/714 (36.8)                                                 | 506/2158 (23.4)    | 1.90 (1.59 - 2.28) | <0.001  | 1.81 (1.50 - 2.18)    | <0.001  |
| n                                       |                                                                | 2872               |                    |         |                       |         |
|                                         | High DP                                                        | Low-moderate DP    |                    |         |                       |         |
| Sleep duration                          |                                                                |                    |                    |         |                       |         |
| ≥6 hours per night                      | 755/1206 (62.6)                                                | 989/1469 (67.3)    |                    |         |                       |         |
| <6 hours per night                      | 451/1206 (37.4)                                                | 480/1469 (32.7)    | 1.23 (1.05 - 1.44) | 0.011   | 1.13 (0.96 - 1.33)    | 0.151   |
| n                                       |                                                                | 2675               |                    |         |                       |         |
| Sleepiness                              |                                                                |                    |                    |         |                       |         |
| <11 ESS                                 | 875/1286 (68.0)                                                | 1267/1639 (77.3)   |                    |         |                       |         |
| ≥11 ESS                                 | 411/1286 (32.0)                                                | 372/1639 (22.7)    | 1.60 (1.38 - 1.89) | <0.001  | 1.48 (1.23 - 1.78)    | <0.001  |
| n                                       |                                                                | 2925               |                    |         |                       |         |
|                                         | Low PA                                                         | Moderate-high PA   |                    |         |                       |         |
| Sleep duration                          |                                                                |                    |                    |         |                       |         |
| ≥6 hours per night                      | 470/688 (68.3)                                                 | 1224/1913 (64.0)   |                    |         |                       |         |
| <6 hours per night                      | 218/688 (31.7)                                                 | 689/1913 (36.0)    | 0.82 (0.68 - 0.99) | 0.041   | 0.85 (0.70 - 1.03)    | 0.091   |
| n                                       |                                                                | 2601               |                    |         |                       |         |
| Sleepiness                              |                                                                |                    |                    |         |                       |         |
| <11 ESS                                 | 561/727 (77.2)                                                 | 1519/2124 (71.5)   |                    |         |                       |         |
| ≥11 ESS                                 | 166/727 (22.8)                                                 | 605/2124 (28.5)    | 0.74 (0.61 - 0.91) | 0.003   | 0.77 (0.63 - 0.94)    | 0.012   |
| n                                       |                                                                | 2851               |                    |         |                       |         |
|                                         | Overall burnout                                                | No overall burnout |                    |         |                       |         |
| Sleep duration                          |                                                                |                    |                    |         |                       |         |
| ≥6 hours per night                      | 279/491 (56.8)                                                 | 1497/2238 (66.9)   |                    |         |                       |         |
| <6 hours per night                      | 212/491 (43.2)                                                 | 741/2238 (33.1)    | 1.54 (1.26 - 1.87) | <0.001  | 1.48 (1.21 - 1.81)    | <0.001  |
| n                                       |                                                                | 2729               |                    |         |                       |         |
| Sleepiness                              |                                                                |                    |                    |         |                       |         |
| <11 ESS                                 | 338/532 (63.5)                                                 | 1852/2464 (75.2)   |                    |         |                       |         |
| ≥11 ESS                                 | 194/532 (36.5)                                                 | 612/2464 (24.8)    | 1.74 (1.42 - 2.12) | <0.001  | 1.72 (1.41 - 2.11)    | <0.001  |
| n                                       |                                                                | 2996               |                    |         |                       |         |

EE, emotional exhaustion; DP, depersonalisation; PA, personal accomplishment; ESS, Epworth Sleepiness Scale; OR, odds ratio; CI, confidence interval; <sup>†</sup>The *n* presented represents the sample for each unadjusted analysis. The *n* for the adjusted analyses are in Supplement 1, Table S2; <sup>‡</sup>Some participants did not provide sufficient information from which to determine their sleep duration and sleepiness. The *n* presented are from those who answered sufficiently; <sup>¶</sup>Adjusted for age, BMI, gender, marital status, hypertension, cigarette use, caffeine use, alcohol use, second job, primary activity, years as police officer, exercise frequency, and seniority. Variables included in each model are in Supplement 1, Table S2.

## DISCUSSION

In this sample of North American police officers, 17% exhibited overall burnout, which is higher than the 10% previously observed in office workers.<sup>18</sup> Two-thirds of the sample (65.5%) were also found to have at least one dimension of burnout, and this too exceeds levels reported in other human service occupations and the general population.<sup>27</sup> Long shifts, mandatory overtime, short sleep and sleepiness were each associated with significantly increased risk of overall burnout in police. Among the different schedules, officers working irregular shifts had a 2-fold higher risk of overall burnout, demonstrating the risk of burnout associated with this schedule for the first time in police. For individual dimensions of burnout, almost half (43%) of police had high depersonalisation, while nearly a quarter had high emotional exhaustion (24%) and low personal accomplishment (24%). The prevalence of DP was higher in this sample of police compared to the US general population (15%), and EE levels were similar to general population data (23%).<sup>27</sup> The risk of EE was higher in police working a greater frequency of long shifts, and working night shifts were associated with an increased risk of DP. Long work weeks were associated with low PA, and mandatory, but not voluntary, overtime increased EE. There was an increased likelihood of EE among police reporting short sleep, and an increased risk for each dimension of burnout in those with excessive sleepiness.

Police regularly completing long work shifts were at increased risk of overall burnout, EE and low PA. Previous studies in nurses have reported similar associations between increased hours of work on the most recent shift and high burnout.<sup>13 14</sup> We expand on these findings by demonstrating how the risk of EE is dependent on the number of long shifts worked, with working  $\geq 4$  long shifts associated with nearly double the risk of EE. Working  $\geq 1$  long shift per

1  
2  
3 month and  $\geq 4$  long shifts per week were also associated with low PA and overall burnout, but the  
4 risk conferred by other shift frequencies (i.e.,  $>0$  to  $<2$ ,  $2$  to  $<4$  long shifts per week) was less  
5 consistent for these aspects of burnout. In contrast to a prior study,<sup>24</sup> working  $\geq 48$  hours per  
6 week was associated with low PA, which along with long shifts, were the only shift  
7 characteristics to increase the risk of low PA in police. This finding could reflect that police were  
8 working long hours but not experiencing a sense of accomplishment from their work in return.<sup>4</sup>  
9  
10 Compared to weekly work hours, however, the associations between long work shifts and  
11 burnout were typically stronger and affected more burnout dimensions. This is an important  
12 detail, as it demonstrates how the distribution of work hours, not just total overall hours,  
13 influences burnout in police. This suggests the need for shorter and less compressed shifts that  
14 spread work hours across the week to reduce burnout. For instance, Amendola et al.<sup>8</sup> found that  
15 police working 10-hour shifts reported longer sleep and higher quality of work-life balance  
16 compared 8- or 12-hour shifts, although burnout was not examined in that study. Further research  
17 is needed to examine whether shortening shift lengths, as well as limiting the frequency of long  
18 work shifts, also reduces burnout in police as it has been shown in EMTs.<sup>15</sup>  
19  
20  
21  
22  
23  
24  
25  
26  
27  
28  
29  
30  
31  
32  
33  
34  
35  
36  
37  
38  
39

40 Mandatory overtime was associated with an increased risk of overall burnout, high EE, and DP  
41 among police. Conversely, voluntary overtime was not associated with EE or overall burnout,  
42 but was associated with high DP. A prior study in police failed to show a relationship between  
43 overtime (combined voluntary and mandatory) and burnout.<sup>17</sup> The results of our study suggest  
44 the control a police officer has over overtime may influence the impact of this shift characteristic  
45 on burnout, in particular overall burnout and EE. This interpretation is supported by research  
46 from Beckers *et al.*<sup>28</sup> in full-time workers who reported involuntary overtime was associated with  
47  
48  
49  
50  
51  
52  
53  
54  
55  
56  
57  
58  
59  
60

1  
2  
3 high emotional fatigue and low job satisfaction, and classified involuntary overtime workers as a  
4 burnout risk group.<sup>28</sup> In their study, Becker and colleagues<sup>28</sup> did not examine DP, but based on  
5 our findings in police, it is possible that voluntary (and mandatory) overtime may pose a risk to  
6 this dimension. Further research determining the specific durations of overtime associated with  
7 high burnout and which dimensions of burnout is needed to inform policies regarding the safe  
8 provision of work hours in excess of normal shift lengths.  
9

10  
11  
12  
13  
14  
15  
16  
17  
18  
19 Increased frequency of night shifts was associated with high DP in police, but not overall  
20 burnout, EE or PA. Researchers have reported associations between increased night work and  
21 burnout in nurses, but only for overall burnout and EE.<sup>12 29</sup> Furthermore, the rate of night shifts  
22 per month was not found to associate with burnout among healthcare workers.<sup>29</sup> These  
23 inconsistencies may reflect differences among human service professions and perhaps their  
24 physical environments (e.g., lighting levels that affect mood and alertness)<sup>30</sup> that may impact the  
25 manifestation of burnout dimensions. For instance, healthcare workers typically develop higher  
26 rates of EE,<sup>31</sup> whereas police report greater DP,<sup>32</sup> as demonstrated in the current study. High DP  
27 reflects a critical relationship between people and their work, as it refers to negative feelings and  
28 attitudes toward one's clients.<sup>4</sup> Therefore, high DP in police could be due to the difficult nature  
29 of some of the people with whom police interact. In addition to sleep disruption with night work,  
30 police encounter more stressful events at night.<sup>33</sup> Sleep is further disrupted among people with  
31 untreated sleep disorders, and common sleep disorders are shown to increase the likelihood of  
32 police demonstrating anger towards suspects or citizens.<sup>3</sup> Thus, the combination of poor mood,  
33 sleep and difficult clients may explain the increased risk of DP associated with regular night  
34 work in police. Further research comparing police attitudes towards clients with whom they  
35  
36  
37  
38  
39  
40  
41  
42  
43  
44  
45  
46  
47  
48  
49  
50  
51  
52  
53  
54  
55  
56  
57  
58  
59  
60

1  
2  
3 interact at night compared to the day is needed to understand the mechanisms underpinning the  
4  
5 increased risk of DP conferred by night shifts in police.  
6  
7  
8  
9

10 Police officers who reported short sleep had a greater risk of overall burnout and EE, while  
11  
12 sleepiness increased the likelihood for all aspects of burnout. Similar sleepiness levels have been  
13  
14 related to high burnout in medical students.<sup>23</sup> Our findings for sleep duration are also consistent  
15  
16 with research showing short sleep over a month increases overall burnout in police.<sup>11</sup> Inadequate  
17  
18 sleep may impair police officers' ability to recover from occupational demands, potentially  
19  
20 explaining the heightened burnout risk in those reporting short sleep in this study. Achieving  
21  
22 sufficient sleep can be difficult when working at night and/or long hours, as these shifts may  
23  
24 limit sleep opportunities at night and involve attempts by the shiftworker to sleep at times of the  
25  
26 day when alertness levels are high (and sleep propensity is low).<sup>34</sup> Indeed, when restricting the  
27  
28 sample to police regularly completing long shifts, officers reporting short sleep and excessive  
29  
30 sleepiness had a 2-fold increased risk of EE (Table S3). These findings highlight the health  
31  
32 burden of sleepiness and sleep loss in law enforcement, and the need for interventions that  
33  
34 address sleep in addition to optimising shift schedules.  
35  
36  
37  
38  
39  
40  
41

42 Police working irregular shifts were more likely to have overall burnout, high EE and DP  
43  
44 compared to officers working fixed shifts. Canadian workers completing non-standard schedules  
45  
46 (shifts other than fixed 9AM-5PM) have also been found to have increased overall burnout and  
47  
48 EE,<sup>35</sup> but to our knowledge, this is the only other study to have investigated the impact of  
49  
50 irregular or non-standard schedules on burnout. A growing body of research suggests that greater  
51  
52 variability in sleep duration and bedtimes predict worse mental health.<sup>36</sup> Workers with irregular  
53  
54  
55  
56  
57  
58  
59  
60



1  
2  
3 shifts are likely to have more variability in their sleep patterns,<sup>37</sup> which in turn, may explain the  
4 increased burnout risk among police engaged in this schedule. Considering 8.9% of our sample  
5 worked irregular shifts, our findings may have implications for arranging work schedules to limit  
6 irregular shifts to reduce burnout. Rotating shifts were also common among police in our study  
7 (24.9%), and associated with high EE and moderate-high PA. Conversely, nurses working fixed  
8 shifts compared to rotating schedules are reported to have greater EE and DP,<sup>38</sup> but not low PA,  
9 with those working fixed night and morning shifts showing the highest levels of EE and DP.<sup>39</sup>  
10 The hazards related to fixed night shifts are well documented,<sup>40</sup> although in the current study it  
11 was not possible to identify the types of fixed shifts police completed. There is also a diverse  
12 range of shift rotations in policing, which were grouped into one variable (i.e., rotating  
13 schedules) in our study. Different shift rotations and types of fixed shifts may have varying  
14 effects on burnout that require further examination.  
15  
16  
17  
18  
19  
20  
21  
22  
23  
24  
25  
26  
27  
28  
29  
30  
31  
32

33 A limitation of this study was the use of self-reported shift and sleep characteristics. Although  
34 some questions used to record police officers' work and sleep hours have been validated,<sup>19</sup>  
35 participants were required to report and recall this information for the prior month. A further  
36 limitation was the cross-sectional design. Future longitudinal studies using objective work and  
37 sleep measures are needed to examine the causality within our findings.  
38  
39  
40  
41  
42  
43  
44  
45  
46

47 The results of this study among police contribute to a growing evidence-base in shift workers  
48 that indicates how the number of long shifts and night shifts, mandatory overtime and short sleep  
49 and sleepiness raise the risk of burnout. Importantly, we further demonstrate that irregular  
50 schedules present a significant risk for burnout. These findings support future research in police  
51  
52  
53  
54  
55  
56  
57  
58  
59  
60

1  
2  
3 that trials reducing the rate of long shifts and night shifts per week in vulnerable officers, and  
4 preventing irregular schedules where possible. Although shift work is unavoidable for industries  
5 such as law enforcement, optimising work hours in relation to control over overtime, consistency  
6 of schedules and reducing duration and frequency of night and long shifts should be explored as  
7 a way to lower the high level of burnout among police, leading to improved health for personnel,  
8 and enhanced performance for their department and communities whom they serve.  
9  
10  
11  
12  
13  
14  
15  
16  
17  
18

19 **Contribution statement:**

20  
21 SAP, APW, LKB, CSO, JPS, SQ, SWL, CAC and SMWR contributed to the design of the study.  
22  
23 LKB, CSO, JPS, SQ, SWL, CAC and SMWR contributed to data collection. SAP, APW, LKB  
24 and SMWR conducted the data analysis. SAP, APW, LKB, CSO, JPS, SQ, SWL, CAC and  
25  
26 SMWR contributed to the interpretation of the data, and the preparation and refinement of the  
27  
28 final manuscript.  
29  
30  
31  
32  
33  
34

35 **Funding:**

36  
37 This work was supported by grant 2004-FS-BX-0001 and grant 2010C-10002 from the National  
38 Institute of Justice, Office of Justice Programs, US Department of Justice; grants R01 OH008496  
39 and R01 OH009403 from the Centers for Disease Control and Prevention; and grants from the  
40 ResMed Foundation. The funders had no role in the design and conduct of the study; collection,  
41 management, analysis, and interpretation of the data; preparation, review, or approval of the  
42 manuscript; and decision to submit the manuscript for publication. LKB, CAC, SWL, CSO and  
43  
44 SQ were supported in part by R01OH010300.  
45  
46  
47  
48  
49  
50  
51  
52  
53  
54  
55  
56  
57  
58  
59  
60

**Data sharing statement:**

No additional data available.

**Ethics approval:**

This study was approved by the Ethics Committees of Partners HealthCare and Monash University.

**Competing interests statement:**

SAP, APW, JPS, SQ and CSO report no conflicts of interest. SMWR reports that he has served as a consultant through his institution to Philips Respironics, EdanSafe, National Transport Commission, Vanda Pharmaceuticals, Rail, Bus and Train Union, Tontine Group, Australian Workers' Union, Transport Accident Commission, Meda Consumer Healthcare, New South Wales Department of Education and Communities, and has through his institution received grants from Philips Respironics and Vanda Pharmaceuticals and reimbursements for conference travel expenses from Vanda Pharmaceuticals. SMWR currently serves as a consult to, and is a Program Leader for, the Cooperative Research Centre for Alertness, Safety and Productivity. SMWR institution has received equipment donations or other support from Compumedics, Philips Lighting, Optalert and Tyco Healthcare. SMWR is a former President of the Australasian Sleep Association and is a Director of the Sleep Health Foundation. SMWR has also served as an expert witness and/or consultant to shift work organizations. LKB reports research support from Cephalon, NFL charities, Sysco and San Francisco Bar Pilots. LKB has received consulting/lecture fees or served as a board member for Alertness Solution, Ceridian, Davis Joint Unified School Board, San Jose State University Foundation, Pugot Sound Pilots, Sygma and

1  
2  
3 Torvec. SWL has no conflicts of interests directly related to the research or results reported in  
4 this paper. SWL holds a process patent for ‘Systems and methods for determining and/or  
5 controlling sleep quality’, which is assigned to the Brigham and Women's Hospital per Hospital  
6 policy. SWL has also served as a paid expert for legal proceedings related to light, sleep and  
7 health. SWL is a Program Leader for the CRC for Alertness, Safety and Productivity, Australia.  
8 CAC reports grants from Cephalon Inc., grants from Mary Ann & Stanley Snider via Combined  
9 Jewish Philanthropies, grants from National Football League Charities, grants from Optum,  
10 grants from Philips Respironics, Inc., grants from ResMed Foundation, grants from San  
11 Francisco Bar Pilots, grants from Schneider Inc., grants from Sysco, grants from Cephalon, Inc,  
12 grants from Jazz Pharmaceuticals, grants from Takeda Pharmaceuticals, grants from Teva  
13 Pharmaceuticals Industries, Ltd, grants from Sanofi-Aventis, Inc, grants from Sepracor, Inc,  
14 grants from Wake Up Narcolepsy, personal fees from Bose Corporation, personal fees from  
15 Boston Celtics, personal fees from Boston Red Sox, personal fees from Columbia River Bar  
16 Pilots, personal fees from Institute of Digital Media and Child Development, personal fees from  
17 Klarman Family Foundation, personal fees from Samsung Electronics, personal fees from Quest  
18 Diagnostics, Inc, personal fees from Vanda Pharmaceuticals, personal fees from American  
19 Academy of Sleep Medicine (AADSM), personal fees from CurtCo Media Labs LLC, personal  
20 fees from Global Council on Brain Health/AARP, personal fees from Hawaii Sleep Health and  
21 Wellness Foundation, personal fees from Harvard School of Public Health (HSPH), personal fees  
22 from Maryland Sleep Society, personal fees from National Institute of Diabetes and Digestive  
23 and Kidney Diseases (NIDDK), personal fees from National Sleep Foundation (NSF), personal  
24 fees from New England College of Optometry, personal fees from University of Michigan,  
25 personal fees from University of Washington, personal fees from Zurich Insurance Company,  
26  
27  
28  
29  
30  
31  
32  
33  
34  
35  
36  
37  
38  
39  
40  
41  
42  
43  
44  
45  
46  
47  
48  
49  
50  
51  
52  
53  
54  
55  
56  
57  
58  
59  
60

1  
2  
3 Ltd, personal fees from Purdue Pharma, LP, personal fees from McGraw Hill, personal fees from  
4  
5 Houghton Mifflin Harcourt/Penguin, personal fees from Koninklijke Philips Electronics, N.V.,  
6  
7 personal fees from Cephalon, Inc, personal fees from State of Washington Board of Pilotage  
8  
9 Commissioners, personal fees from Ganesco Inc., holds an equity interest in Vanda  
10  
11 Pharmaceuticals, outside the submitted work. In addition, CAC holds a number of process  
12  
13 patents in the field of sleep/circadian rhythms (e.g., photic resetting of the human circadian  
14  
15 pacemaker).  
16  
17  
18  
19  
20

## 21 REFERENCES

- 22  
23  
24 1. Vila B. Impact of long work hours on police officers and the communities they serve. *Am J*  
25  
26 *Ind Med* 2006;49:972-80. doi: 10.1002/ajim.20333  
27
- 28  
29 2. Fekedulegn D, Burchfiel CM, Charles LE, et al. Shift Work and Sleep Quality Among Urban  
30  
31 Police Officers: The BCOPS Study. *J Occup Environ Med* 2016;58:e66-71. doi:  
32  
33 10.1097/jom.0000000000000620  
34
- 35  
36 3. Rajaratnam SM, Barger LK, Lockley SW, et al. Sleep disorders, health, and safety in police  
37  
38 officers. *JAMA* 2011;306:2567-78.  
39
- 40  
41 4. Maslach CM, Jackson SE, Leiter MP. Maslach Burnout Inventory: Manual. 3rd Edition. Palo  
42  
43 Alto, CA: Consulting Psychologists Press 1996.
- 44  
45 5. McGreevy K. Selection practices and the police role. *Police Chief* 1974;41:41-3.  
46
- 47  
48 6. Crowe RP, Bower JK, Cash RE, et al. Association of Burnout with Workforce-Reducing  
49  
50 Factors among EMS Professionals. *Prehosp Emerg Care* 2018;22:229-36. doi:  
51  
52 10.1080/10903127.2017.1356411  
53  
54  
55  
56  
57  
58  
59  
60

- 1  
2  
3 7. Summerfield D. Metropolitan Police blues: protracted sickness absence, ill health retirement,  
4  
5 and the occupational psychiatrist. *BMJ* 2011;342:d2127. doi: 10.1136/bmj.d2127  
6  
7
- 8 8. Amendola K, Weisburd D, Hamilton E, et al. The Impact of Shift Length in Policing on  
9  
10 Performance, Health, Quality of Life, Sleep, Fatigue, and Extra-Duty Employment:  
11  
12 National Institute of Justice, Office of Justice Programs, US Department of Justice, 2011.  
13  
14
- 15 9. Barger L, Lockley S, Rajaratnam S, et al. Neurobehavioral, health, and safety consequences  
16  
17 associated with shift work in safety-sensitive professions. *Curr Neurol Neurosci Rep*  
18  
19 2009;9:155-64. doi: 10.1007/s11910-009-0024-7  
20  
21
- 22 10. Cheng W-J, Cheng Y. Night shift and rotating shift in association with sleep problems,  
23  
24 burnout and minor mental disorder in male and female employees. *Occup Environ Med*  
25  
26 2017;74:483-88. doi: 10.1136/oemed-2016-103898  
27  
28
- 29 11. Yoo H, Franke WD. Sleep habits, mental health, and the metabolic syndrome in law  
30  
31 enforcement officers. *J Occup Environ Med* 2013;55:99-103. doi:  
32  
33 10.1097/JOM.0b013e31826e294c  
34
- 35 12. Embriaco N, Azoulay E, Barrau K, et al. High level of burnout in intensivists: prevalence and  
36  
37 associated factors. *Am J Respir Crit Care Med* 2007;175:686-92. doi:  
38  
39 10.1164/rccm.200608-1184OC  
40  
41
- 42 13. Dall'Ora C, Griffiths P, Ball J, et al. Association of 12 h shifts and nurses' job satisfaction,  
43  
44 burnout and intention to leave: findings from a cross-sectional study of 12 European  
45  
46 countries. *BMJ Open* 2015;5:e008331. doi: 10.1136/bmjopen-2015-008331  
47  
48
- 49 14. Stimpfel AW, Sloane DM, Aiken LH. The longer the shifts for hospital nurses, the higher the  
50  
51 levels of burnout and patient dissatisfaction. *Health Aff* 2012;31:2501-9. doi:  
52  
53 10.1377/hlthaff.2011.1377  
54  
55  
56  
57  
58  
59  
60

- 1  
2  
3 15. Boudreaux E, Mandry C, Brantley PJ. Emergency medical technician schedule modification:  
4 impact and implications during short- and long-term follow-up. *Acad Emerg Med*  
5 1998;5:128-33.  
6  
7  
8  
9  
10 16. Fahrenkopf AM, Sectish TC, Barger LK, et al. Rates of medication errors among depressed  
11 and burnt out residents: prospective cohort study. *BMJ* 2008;336:488-91. doi:  
12 10.1136/bmj.39469.763218.BE  
13  
14  
15  
16  
17 17. Martinussen M, Richardsen AM, Burke RJ. Job demands, job resources, and burnout among  
18 police officers. *J Crim Justice* 2007;35:239-49. doi: 10.1016/j.jcrimjus.2007.03.001  
19  
20  
21 18. Metlaine A, Sauvet F, Gomez-Merino D, et al. Association between insomnia symptoms, job  
22 strain and burnout syndrome: a cross-sectional survey of 1300 financial workers. *BMJ*  
23 *Open* 2017;7:e012816. doi: 10.1136/bmjopen-2016-012816  
24  
25  
26  
27  
28 19. Lockley SW, Cronin JW, Evans EE, et al. Effect of reducing interns' weekly work hours on  
29 sleep and attentional failures. *N Engl J Med* 2004;351:1829-37. doi:  
30 10.1056/NEJMoa041404  
31  
32  
33  
34  
35 20. Johns MW. Sensitivity and specificity of the multiple sleep latency test (MSLT), the  
36 maintenance of wakefulness test and the Epworth sleepiness scale: failure of the MSLT  
37 as a gold standard. *J Sleep Res* 2000;9:5-11.  
38  
39  
40  
41  
42 21. De la Fuente Solana EI, Aguayo Extremera R, Vargas Pecino C, et al. Prevalence and risk  
43 factors of burnout syndrome among Spanish police officers. *Psicothema* 2013;25:488-93.  
44 doi: 10.7334/psicothema2013.81  
45  
46  
47  
48  
49 22. Kou K-Y, Wu H-H. Assessing Emotional Exhaustion of Police Officers in Taiwan by  
50 Multivariate Analysis of Variance. *TEM Journal* 2016;5:347-52.  
51  
52  
53  
54  
55  
56  
57  
58  
59  
60

- 1  
2  
3 23. Wolf MR, Rosenstock JB. Inadequate Sleep and Exercise Associated with Burnout and  
4  
5 Depression Among Medical Students. *Acad Psychiatry* 2017;41:174-79. doi:  
6  
7 10.1007/s40596-016-0526-y  
8  
9
- 10 24. Houdmont J, Randall R. Working hours and common mental disorders in English police  
11  
12 officers. *Occup Med* 2016;66:713-18. doi: 10.1093/occmed/kqw166  
13  
14
- 15 25. Bureau of Labor Statistics. Current Population Survey (CPS): annual averages—household  
16  
17 data, 2007.  
18
- 19 26. Flegal KM, Kruszon-Moran D, Carroll MD, et al. Trends in Obesity Among Adults in the  
20  
21 United States, 2005 to 2014. *JAMA* 2016;315:2284-91. doi: 10.1001/jama.2016.6458  
22  
23
- 24 27. Shanafelt TD, Boone S, Tan L, et al. Burnout and satisfaction with work-life balance among  
25  
26 US physicians relative to the general US population. *Arch Intern Med* 2012;172:1377-85.  
27  
28 doi: 10.1001/archinternmed.2012.3199  
29
- 30 28. Beckers DG, van der Linden D, Smulders PG, et al. Voluntary or involuntary? Control over  
31  
32 overtime and rewards for overtime in relation to fatigue and work satisfaction. *Work*  
33  
34 *Stress* 2008;22:33-50.  
35  
36
- 37 29. Wisetborisut A, Angkurawaranon C, Jiraporncharoen W, et al. Shift work and burnout  
38  
39 among health care workers. *Occup Med* 2014;64:279-86. doi: 10.1093/occmed/kqu009  
40  
41
- 42 30. Bedrosian TA, Nelson RJ. Timing of light exposure affects mood and brain circuits. *Transl*  
43  
44 *Psychiatry* 2017;7:e1017. doi: 10.1038/tp.2016.262  
45  
46
- 47 31. Grunfeld E, Whelan TJ, Zitzelsberger L, et al. Cancer care workers in Ontario: prevalence of  
48  
49 burnout, job stress and job satisfaction. *CMAJ* 2000;163:166-69.  
50  
51
- 52 32. Schaufeli W, Enzmann D. The burnout companion to study and practice: A critical analysis.  
53  
54 Philadelphia, PA. CRC Press, Taylor & Francis Group 1998.  
55  
56  
57  
58  
59  
60



- 1  
2  
3 33. Ma CC, Andrew ME, Fekedulegn D, et al. Shift Work and Occupational Stress in Police  
4  
5 Officers. *Saf Health Work* 2015;6:25-29. doi: 10.1016/j.shaw.2014.10.001  
6  
7  
8 34. Arendt J. Shift work: coping with the biological clock. *Occup Med* 2010;60:10-20. doi:  
9  
10 10.1093/occmed/kqp162  
11  
12 35. Jamal M. Burnout, stress and health of employees on non-standard work schedules: a study  
13  
14 of Canadian workers. *Stress Health* 2004;20:113-19. doi: 10.1002/smi.1012  
15  
16  
17 36. Lemola S, Ledermann T, Friedman EM. Variability of sleep duration is related to subjective  
18  
19 sleep quality and subjective well-being: an actigraphy study. *PloS one* 2013;8:e71292.  
20  
21  
22 37. Sallinen M, Härmä M, Mutanen P, et al. Sleep–wake rhythm in an irregular shift system. *J*  
23  
24 *Sleep Res* 2003;12:103-12.  
25  
26 38. Shamali M, Shahriari M, Babaii A, et al. Comparative Study of Job Burnout Among Critical  
27  
28 Care Nurses With Fixed and Rotating Shift Schedules. *Nurs Midwifery Stud*  
29  
30 2015;4:e27766. doi: 10.17795/nmsjournal27766  
31  
32  
33 39. Shahriari M, Shamali M, Yazdannik A. The relationship between fixed and rotating shifts  
34  
35 with job burnout in nurses working in critical care areas. *Iran J Nurs Midwifery Res*  
36  
37 2014;19:360-65.  
38  
39  
40 40. Folkard S. Do permanent night workers show circadian adjustment? A review based on the  
41  
42 endogenous melatonin rhythm. *Chronobiol Int* 2008;25:215-24.  
43  
44  
45  
46  
47  
48  
49  
50  
51  
52  
53  
54  
55  
56  
57  
58  
59  
60

## Supplement

**Table S1.** High burnout outcomes associated with shift work characteristics in police (n=3140)

| Shift work characteristic, <i>n</i> <sup>†</sup> | Positive result in police with burnout, No./No. total (%) |                    | Unadjusted         |                | Adjusted <sup>¶</sup> |                |
|--------------------------------------------------|-----------------------------------------------------------|--------------------|--------------------|----------------|-----------------------|----------------|
|                                                  |                                                           |                    | OR (95% CI)        | <i>P</i> Value | OR (95% CI)           | <i>P</i> Value |
| Total hours of overtime<br><i>n</i>              | High EE                                                   | Low-moderate EE    | 1.00 (1.00 - 1.01) | 0.275          | 1.00 (1.00 - 1.01)    | 0.181          |
|                                                  | 2728                                                      |                    |                    |                |                       |                |
| Total hours of overtime<br><i>n</i>              | High DP                                                   | Low-moderate DP    | 1.00 (1.00 - 1.01) | 0.104          | 1.00 (1.00 - 1.01)    | 0.182          |
|                                                  | 2788                                                      |                    |                    |                |                       |                |
| Total hours of overtime<br><i>n</i>              | Low PA                                                    | Moderate-high PA   | 1.00 (1.00 - 1.01) | 0.024          | 1.00 (1.00 - 1.01)    | 0.031          |
|                                                  | 2717                                                      |                    |                    |                |                       |                |
| Total hours of overtime<br><i>n</i>              | Overall burnout                                           | No overall burnout | 1.00 (1.00 - 1.01) | 0.169          | 1.00 (1.00 - 1.01)    | 0.163          |
|                                                  | 2845                                                      |                    |                    |                |                       |                |

EE, emotional exhaustion; DP, depersonalisation; PA, personal accomplishment; OR, odds ratio; CI, confidence interval; <sup>†</sup>The *n* presented represents the sample for each unadjusted analysis. The *n* for the adjusted analyses are in Supplement 1, Table S2; <sup>‡</sup>Some participants did not provide sufficient information from which to determine their overtime. The *n* presented are from those who answered sufficiently; <sup>¶</sup>Adjusted for age, BMI, gender, marital status, hypertension, cigarette use, caffeine use, alcohol, second job, primary activity, years as police officer, exercise frequency, and seniority. Variables included in each model are in Supplement 1, Table S2.

**Table S2.** Variables included in the models used to examine associations between shift characteristics, shift schedules, sleep, and burnout outcomes

| <b>Shift work and sleep characteristics, <i>n</i><sup>‡</sup></b> | <b>Emotional Exhaustion</b>                | <b>Depersonalisation</b>                                                                | <b>Personal Accomplishment</b>                                     | <b>Burnout (High EE+DP)</b>                             |
|-------------------------------------------------------------------|--------------------------------------------|-----------------------------------------------------------------------------------------|--------------------------------------------------------------------|---------------------------------------------------------|
| <b>Night shift frequency</b>                                      | Gender, cigarette use, seniority           | Age, cigarette use, second job, primary activity, years in law enforcement, seniority   | Age, BMI <sup>†</sup> , cigarette use, caffeine use, exercise      | Age, cigarette use, seniority                           |
| <b><i>n</i></b>                                                   | 2882                                       | 2440                                                                                    | 2837                                                               | 3015                                                    |
| <b>Long work shifts</b>                                           | Gender, cigarette use, exercise, seniority | Age, cigarette use, caffeine use, primary activity, years in law enforcement, seniority | Age, caffeine use, exercise                                        | Gender, cigarette use, seniority                        |
| <b><i>n</i></b>                                                   | 2220                                       | 2250                                                                                    | 2252                                                               | 2328                                                    |
| <b>Long work weeks</b>                                            | Gender, cigarette use, seniority           | Age, cigarette use, second job, primary activity, seniority                             | Age, BMI <sup>†</sup> , cigarette use, exercise                    | Age, cigarette use, seniority                           |
| <b><i>n</i></b>                                                   | 2862                                       | 2479                                                                                    | 2873                                                               | 2994                                                    |
| <b>Shift rotation</b>                                             | Gender, cigarette use, seniority           | Age, cigarette use, second job, primary activity, years in law enforcement, seniority   | Age, BMI <sup>†</sup> , cigarette use, caffeine use, exercise      | Age, cigarette use, years in law enforcement, seniority |
| <b><i>n</i></b>                                                   | 2894                                       | 2451                                                                                    | 2889                                                               | 2992                                                    |
| <b>Mandatory OT hours</b>                                         | Gender, cigarette use, seniority           | Age, cigarette use, second job, primary activity, years in law enforcement, seniority   | Age, BMI <sup>†</sup> , cigarette use, primary activity, exercise  | Age, cigarette use, seniority                           |
| <b><i>n</i></b>                                                   | 2512                                       | 2353                                                                                    | 2515                                                               | 2622                                                    |
| <b>Voluntary OT hours</b>                                         | Gender, cigarette use, seniority           | Age, cigarette use, primary activity, seniority                                         | Age, BMI <sup>†</sup> , cigarette use, primary activity, seniority | Age, cigarette use, seniority                           |
| <b><i>n</i></b>                                                   | 2531                                       | 2587                                                                                    | 2508                                                               | 2639                                                    |
| <b>Total OT hours</b>                                             | Gender, cigarette use, seniority           | Age, cigarette use, primary activity, years in law enforcement, seniority               | Age, cigarette use, exercise                                       | Age, cigarette use, seniority                           |
| <b><i>n</i></b>                                                   | 2675                                       | 2713                                                                                    | 2690                                                               | 2791                                                    |
| <b>Sleepiness</b>                                                 | Gender, cigarette use, exercise, seniority | Age, cigarette use, second job, primary activity, seniority                             | Age, BMI <sup>†</sup> , cigarette use, exercise                    | Age, cigarette use, seniority                           |
| <b><i>n</i></b>                                                   | 2772                                       | 2375                                                                                    | 2800                                                               | 2921                                                    |
| <b>Sleep duration</b>                                             | Gender, cigarette use, seniority           | Age, cigarette use, caffeine use, primary activity, exercise, seniority                 | Age, BMI <sup>†</sup> , cigarette use, primary activity, exercise  | Age, primary activity, seniority                        |
| <b><i>n</i></b>                                                   | 2554                                       | 2595                                                                                    | 2560                                                               | 2663                                                    |

EE, emotional exhaustion; DP, depersonalization; OT, overtime; BMI, body mass index;

<sup>†</sup>BMI was a continuous variable; <sup>‡</sup>The *n* presented represents the sample for the adjusted analyses.

**Table S3.** High burnout outcomes associated with sleep and sleepiness in police regularly working night shifts (1-4 nights per week or night shifts nearly every day; n=1199)

| Sleep characteristic, <i>n</i> <sup>†</sup> | Positive result in police with high burnout, No./No. total (%) |                    | Unadjusted         | <i>P</i> Value | Adjusted <sup>‡</sup> | <i>P</i> Value |
|---------------------------------------------|----------------------------------------------------------------|--------------------|--------------------|----------------|-----------------------|----------------|
|                                             | High EE                                                        | Low-moderate EE    | OR (95% CI)        |                | OR (95% CI)           |                |
| Sleep duration                              |                                                                |                    |                    |                |                       |                |
| ≥6 hours per night                          | 140/273 (51.3)                                                 | 451/775 (58.2)     | 1.32 (1.00 - 1.74) | 0.048          | 1.37 (1.03 - 1.82)    | 0.029          |
| <6 hours per night                          | 133/273 (48.7)                                                 | 324/775 (41.8)     |                    |                |                       |                |
| <i>n</i>                                    | 1048                                                           |                    |                    |                |                       |                |
| Sleepiness                                  |                                                                |                    |                    |                |                       |                |
| <11 ESS                                     | 159/278 (57.2)                                                 | 601/822 (73.1)     | 2.04 (1.53 - 2.70) | <0.001         | 2.02 (1.51 - 2.70)    | <0.001         |
| ≥11 ESS                                     | 119/278 (42.8)                                                 | 221/822 (26.9)     |                    |                |                       |                |
| <i>n</i>                                    | 1100                                                           |                    |                    |                |                       |                |
|                                             | High DP                                                        | Low-moderate DP    |                    |                |                       |                |
| Sleep duration                              |                                                                |                    |                    |                |                       |                |
| ≥6 hours per night                          | 293/515 (56.9)                                                 | 317/557 (56.9)     | 1.00 (0.79 - 1.28) | 0.995          | 1.02 (0.79 - 1.32)    | 0.867          |
| <6 hours per night                          | 222/515 (43.1)                                                 | 240/557 (43.1)     |                    |                |                       |                |
| <i>n</i>                                    | 1072                                                           |                    |                    |                |                       |                |
| Sleepiness                                  |                                                                |                    |                    |                |                       |                |
| <11 ESS                                     | 327/533 (61.4)                                                 | 446/590 (75.6)     | 1.95 (1.51 - 2.52) | <0.001         | 2.06 (1.58 - 2.68)    | <0.001         |
| ≥11 ESS                                     | 206/533 (38.6)                                                 | 144/590 (24.4)     |                    |                |                       |                |
| <i>n</i>                                    | 1123                                                           |                    |                    |                |                       |                |
|                                             | Low PA                                                         | Moderate-high PA   |                    |                |                       |                |
| Sleep duration                              |                                                                |                    |                    |                |                       |                |
| ≥6 hours per night                          | 161/274 (58.8)                                                 | 444/786 (56.5)     | 0.91 (0.69 - 1.20) | 0.513          | 0.90 (0.67 - 1.19)    | 0.447          |
| <6 hours per night                          | 113/274 (41.2)                                                 | 342/786 (43.5)     |                    |                |                       |                |
| <i>n</i>                                    | 1060                                                           |                    |                    |                |                       |                |
| Sleepiness                                  |                                                                |                    |                    |                |                       |                |
| <11 ESS                                     | 210/281 (74.7)                                                 | 551/826 (66.7)     | .068 (0.50 - 0.92) | 0.012          | 0.70 (0.51 - 0.95)    | 0.024          |
| ≥11 ESS                                     | 71/281 (25.3)                                                  | 275/826 (33.3)     |                    |                |                       |                |
| <i>n</i>                                    | 1107                                                           |                    |                    |                |                       |                |
|                                             | Overall burnout                                                | No overall burnout |                    |                |                       |                |
| Sleep duration                              |                                                                |                    |                    |                |                       |                |
| ≥6 hours per night                          | 111/207 (53.6)                                                 | 511/890 (57.4)     | 1.17 (0.86 - 1.58) | 0.322          | 1.25 (0.92 - 1.71)    | 0.154          |
| <6 hours per night                          | 96/207 (46.4)                                                  | 379/890 (42.6)     |                    |                |                       |                |
| <i>n</i>                                    | 1097                                                           |                    |                    |                |                       |                |
| Sleepiness                                  |                                                                |                    |                    |                |                       |                |
| <11 ESS                                     | 121/214 (56.5)                                                 | 667/934 (71.4)     | 1.92 (1.42 - 2.61) | <0.001         | 2.04 (1.49 - 2.79)    | <0.001         |
| ≥11 ESS                                     | 93/214 (43.5)                                                  | 267/934 (28.6)     |                    |                |                       |                |
| <i>n</i>                                    | 1148                                                           |                    |                    |                |                       |                |

EE, emotional exhaustion; DP, depersonalisation; PA, personal accomplishment; ESS, Epworth Sleepiness Scale; OR, odds ratio; CI, confidence interval; <sup>†</sup>The *n* presented represents the sample for each unadjusted analysis. The *n* for the adjusted analyses are in Supplement 1, Table S7; <sup>‡</sup>Some participants did not provide sufficient information from which to determine their sleep duration and sleepiness. The *n* presented are from those who answered sufficiently; <sup>¶</sup>Adjusted for age, BMI, gender, marital status, hypertension, cigarette use, caffeine use, alcohol use, second job, primary activity, years as police officer, exercise frequency, and seniority. Variables included in each model are in Supplement 1, Table S7.

**Table S4.** High burnout outcomes associated with sleep and sleepiness in police regularly working long work shifts (>2 long work shifts per week; n=978)

| Sleep characteristic, <i>n</i> <sup>†</sup> | Positive result in police with high burnout, No./No. total (%) |                 | Unadjusted         | <i>P</i> Value | Adjusted <sup>‡</sup> | <i>P</i> Value |
|---------------------------------------------|----------------------------------------------------------------|-----------------|--------------------|----------------|-----------------------|----------------|
|                                             | High EE                                                        | Low-moderate EE | OR (95% CI)        |                | OR (95% CI)           |                |
| Sleep duration                              |                                                                |                 |                    |                |                       |                |
| ≥6 hours per night                          | 105/228 (46.1)                                                 | 398/617 (64.5)  | 2.13 (1.56 - 2.90) | <0.001         | 2.02 (1.46 - 2.78)    | <0.001         |
| <6 hours per night                          | 123/228 (53.9)                                                 | 219/617 (35.5)  |                    |                |                       |                |
| <i>n</i>                                    | 845                                                            |                 |                    |                |                       |                |
| Sleepiness                                  |                                                                |                 |                    |                |                       |                |
| <11 ESS                                     | 139/234 (59.4)                                                 | 502/664 (75.6)  | 2.12 (1.55 - 2.90) | <0.001         | 1.99 (1.43 - 2.77)    | <0.001         |
| ≥11 ESS                                     | 95/234 (40.6)                                                  | 162/664 (24.4)  |                    |                |                       |                |
| <i>n</i>                                    | 898                                                            |                 |                    |                |                       |                |
| Sleep duration                              |                                                                |                 |                    |                |                       |                |
| ≥6 hours per night                          | 198/371 (53.4)                                                 | 317/486 (65.2)  | 1.64 (1.24 - 2.16) | <0.001         | 1.46 (1.09 - 1.97)    | 0.012          |
| <6 hours per night                          | 169/371 (46.6)                                                 | 173/487 (34.8)  |                    |                |                       |                |
| <i>n</i>                                    | 857                                                            |                 |                    |                |                       |                |
| Sleepiness                                  |                                                                |                 |                    |                |                       |                |
| <11 ESS                                     | 244/384 (63.5)                                                 | 403/523 (77.1)  | 1.93 (1.44 - 2.58) | <0.001         | 1.97 (1.46 - 2.66)    | <0.001         |
| ≥11 ESS                                     | 140/384 (36.5)                                                 | 120/523 (22.9)  |                    |                |                       |                |
| <i>n</i>                                    | 907                                                            |                 |                    |                |                       |                |
| Sleep duration                              |                                                                |                 |                    |                |                       |                |
| ≥6 hours per night                          | 159/252 (63.1)                                                 | 340/581 (58.5)  | 0.83 (0.61 - 1.12) | 0.216          | 0.88 (0.65 - 1.20)    | 0.428          |
| <6 hours per night                          | 93/252 (36.9)                                                  | 241/581 (41.5)  |                    |                |                       |                |
| <i>n</i>                                    | 833                                                            |                 |                    |                |                       |                |
| Sleepiness                                  |                                                                |                 |                    |                |                       |                |
| <11 ESS                                     | 187/250 (74.8)                                                 | 439/630 (69.7)  | 0.77 (0.56 - 1.08) | 0.131          | 0.79 (0.57 - 1.12)    | 0.184          |
| ≥11 ESS                                     | 63/250 (25.2)                                                  | 191/630 (30.3)  |                    |                |                       |                |
| <i>n</i>                                    | 880                                                            |                 |                    |                |                       |                |
| Overall burnout                             |                                                                |                 |                    |                |                       |                |
| Overall burnout                             |                                                                |                 |                    |                |                       |                |
| No overall burnout                          |                                                                |                 |                    |                |                       |                |
| Sleep duration                              |                                                                |                 |                    |                |                       |                |
| ≥6 hours per night                          | 77/169 (45.6)                                                  | 444/706 (62.9)  | 2.03 (1.44 - 2.84) | <0.001         | 1.92 (1.35 - 2.72)    | <0.001         |
| <6 hours per night                          | 92/169 (54.5)                                                  | 262/706 (37.1)  |                    |                |                       |                |
| <i>n</i>                                    | 875                                                            |                 |                    |                |                       |                |
| Sleepiness                                  |                                                                |                 |                    |                |                       |                |
| <11 ESS                                     | 101/175 (57.7)                                                 | 560/754 (74.3)  | 2.12 (1.50 - 2.98) | <0.001         | 2.03 (1.43 - 2.89)    | <0.001         |
| ≥11 ESS                                     | 74/175 (42.3)                                                  | 194/754 (25.7)  |                    |                |                       |                |
| <i>n</i>                                    | 929                                                            |                 |                    |                |                       |                |

EE, emotional exhaustion; DP, depersonalisation; PA, personal accomplishment; ESS, Epworth Sleepiness Scale; OR, odds ratio; CI, confidence interval; <sup>†</sup>The *n* presented represents the sample for each unadjusted analysis. The *n* for the adjusted analyses are in Supplement 1, Table S7; <sup>‡</sup>Some participants did not provide sufficient information from which to determine their sleep duration and sleepiness. The *n* presented are from those who answered sufficiently; <sup>¶</sup>Adjusted for age, BMI, gender, marital status, hypertension, cigarette use, caffeine use, alcohol use, second job, primary activity, years as police officers, exercise frequency, and seniority. Variables included in each model are in Supplement 1, Table S7.

**Table S5.** High burnout outcomes associated with working at least 1 long shift in the past 4 weeks (n=3140)

| Worked >0 Long Shifts<br>in Past 4 Weeks, n <sup>†</sup> | Positive result in police with high burnout,<br>No./No. total (%) |                    | Unadjusted         |         | Adjusted <sup>¶</sup> |         |
|----------------------------------------------------------|-------------------------------------------------------------------|--------------------|--------------------|---------|-----------------------|---------|
|                                                          |                                                                   |                    | OR (95% CI)        | P Value | OR (95% CI)           | P Value |
|                                                          | High EE                                                           | Low-moderate EE    |                    |         |                       |         |
| No                                                       | 69/575 (12.0)                                                     | 296/1719 (17.2)    |                    |         |                       |         |
| Yes                                                      | 506/575 (88.0)                                                    | 1423/1719 (82.8)   | 1.53 (1.52 - 2.02) | 0.003   | 1.54 (1.51 - 2.06)    | 0.004   |
| n                                                        | 2294                                                              |                    |                    |         |                       |         |
|                                                          | High DP                                                           | Low-moderate DP    |                    |         |                       |         |
| No                                                       | 151/1027 (14.7)                                                   | 226/1316 (17.2)    |                    |         |                       |         |
| Yes                                                      | 876/1027 (85.3)                                                   | 1090/1316 (82.8)   | 1.20 (0.96 - 1.51) | 0.107   | 1.12 (0.88 - 1.41)    | 0.365   |
| n                                                        | 2343                                                              |                    |                    |         |                       |         |
|                                                          | Low PA                                                            | Moderate-high PA   |                    |         |                       |         |
| No                                                       | 76/591 (12.9)                                                     | 292/1685 (17.3)    |                    |         |                       |         |
| Yes                                                      | 515/591 (87.1)                                                    | 1393/1685 (82.7)   | 1.42 (1.08 - 1.86) | 0.011   | 1.35 (1.03 - 1.78)    | 0.033   |
| n                                                        | 2276                                                              |                    |                    |         |                       |         |
|                                                          | Overall burnout                                                   | No overall burnout |                    |         |                       |         |
| No                                                       | 51/426 (12.0)                                                     | 338/1967 (17.2)    |                    |         |                       |         |
| Yes                                                      | 375/426 (88.0)                                                    | 1629/1967 (82.8)   | 1.53 (1.11 - 2.09) | 0.009   | 1.43 (1.04 - 1.98)    | 0.029   |
| n                                                        | 2393                                                              |                    |                    |         |                       |         |

EE, emotional exhaustion; DP, depersonalisation; PA, personal accomplishment; OR, odds ratio; CI, confidence interval; <sup>†</sup>The *n* presented represents the sample for each unadjusted analysis. The *n* for the adjusted analyses are in Supplement 1, Table S7; <sup>‡</sup>Some participants did not provide sufficient information from which to determine their long shifts. The *n* presented are from those who answered sufficiently; <sup>¶</sup>Adjusted for age, BMI, gender, marital status, hypertension, cigarette use, caffeine use, alcohol use, second job, primary activity, years as police officers, exercise frequency, and seniority. Variables included in each model are in Supplement 1, Table S7.

**Table S6.** Variables included in models used to examine associations between sleep and sleepiness, shift schedules and burnout outcomes in police regularly working night shifts, extended shifts or fixed shift schedules

| <b>Shift work and sleep characteristics, <i>n</i>‡</b> | <b>Emotional Exhaustion</b>      | <b>Depersonalisation</b>                                                                | <b>Personal Accomplishment</b> | <b>Burnout (High EE+DP)</b>      |
|--------------------------------------------------------|----------------------------------|-----------------------------------------------------------------------------------------|--------------------------------|----------------------------------|
| <b>(Night shift sample)<br/>Sleep duration</b>         | Seniority, gender                | Age, marital status, years in law enforcement, seniority                                | Age, †BMI, exercise            | Primary activity, seniority      |
| <b><i>n</i></b>                                        | 1040                             | 1051                                                                                    | 1050                           | 1087                             |
| <b>(Night shift sample)<br/>Sleepiness</b>             | Gender, cigarette use, seniority | Age, years in law enforcement                                                           | Age, cigarette use, exercise   | Age, primary activity, seniority |
| <b><i>n</i></b>                                        | 1092                             | 1109                                                                                    | 1096                           | 1136                             |
| <b>(Extended shift sample)<br/>Sleep duration</b>      | Gender, seniority                | Age, blood pressure, primary activity, seniority                                        | Age, cigarette use, exercise   | Age, seniority                   |
| <b><i>n</i></b>                                        | 813                              | 782                                                                                     | 827                            | 842                              |
| <b>(Extended shift sample)<br/>Sleepiness</b>          | Gender, seniority                | Age, exercise                                                                           | Age, cigarette use, exercise   | Seniority                        |
| <b><i>n</i></b>                                        | 856                              | 904                                                                                     | 876                            | 887                              |
| <b>&gt;0 Long shifts in past 4 weeks</b>               | Gender, Cigarette use, seniority | Age, cigarette use, caffeine use, primary activity, years in law enforcement, seniority | Age, caffeine use, exercise    | Cigarette use, seniority         |
| <b><i>n</i></b>                                        | 2230                             | 2250                                                                                    | 2252                           | 2330                             |

EE, emotional exhaustion; DP, depersonalization; OT, overtime; BMI, body mass index; †BMI was a continuous variable; ‡The *n* presented represents the sample for the adjusted analyses.

STROBE Statement—Checklist of items that should be included in reports of *cross-sectional studies*

|                           | Item No | Recommendation                                                                                                                                                                       | Reported on Page No.                                 |
|---------------------------|---------|--------------------------------------------------------------------------------------------------------------------------------------------------------------------------------------|------------------------------------------------------|
| <b>Title and abstract</b> | 1       | (a) Indicate the study's design with a commonly used term in the title or the abstract                                                                                               | Page 2                                               |
|                           |         | (b) Provide in the abstract an informative and balanced summary of what was done and what was found                                                                                  | Page 2                                               |
| <b>Introduction</b>       |         |                                                                                                                                                                                      |                                                      |
| Background/rationale      | 2       | Explain the scientific background and rationale for the investigation being reported                                                                                                 | Pages 4-5                                            |
| Objectives                | 3       | State specific objectives, including any prespecified hypotheses                                                                                                                     | Page 5                                               |
| <b>Methods</b>            |         |                                                                                                                                                                                      |                                                      |
| Study design              | 4       | Present key elements of study design early in the paper                                                                                                                              | Pages 5-6 with additional details presented in Ref#3 |
| Setting                   | 5       | Describe the setting, locations, and relevant dates, including periods of recruitment, exposure, follow-up, and data collection                                                      | Pages 5-6 with additional details presented in Ref#3 |
| Participants              | 6       | (a) Give the eligibility criteria, and the sources and methods of selection of participants                                                                                          | Pages 5-6 with additional details presented in Ref#3 |
| Variables                 | 7       | Clearly define all outcomes, exposures, predictors, potential confounders, and effect modifiers. Give diagnostic criteria, if applicable                                             | Pages 6-7                                            |
| Data sources/ measurement | 8*      | For each variable of interest, give sources of data and details of methods of assessment (measurement). Describe comparability of assessment methods if there is more than one group | Pages 6-7                                            |
| Bias                      | 9       | Describe any efforts to address potential sources of bias                                                                                                                            | Pages 5-6                                            |
| Study size                | 10      | Explain how the study size was arrived at                                                                                                                                            | Pages 5-6                                            |
| Quantitative variables    | 11      | Explain how quantitative variables were handled in the analyses. If applicable, describe which groupings were chosen and why                                                         | Pages 6-7                                            |
| Statistical methods       | 12      | (a) Describe all statistical methods, including those used to control for confounding                                                                                                | Pages 7-8                                            |
|                           |         | (b) Describe any methods used to examine subgroups and interactions                                                                                                                  | Page 7                                               |
|                           |         | (c) Explain how missing data were addressed                                                                                                                                          | Pages 9-10, reported in Table 1;                     |
|                           |         |                                                                                                                                                                                      | Pages 13-15, reported in Table 2;                    |
|                           |         |                                                                                                                                                                                      | Page 16, reported in Table 3;                        |
|                           |         |                                                                                                                                                                                      | Page 18, reported in Table 4.                        |
|                           |         | (d) If applicable, describe analytical methods taking account of sampling                                                                                                            | N/A                                                  |



|                          |     |                                                                                                                                                                                                              |                                         |
|--------------------------|-----|--------------------------------------------------------------------------------------------------------------------------------------------------------------------------------------------------------------|-----------------------------------------|
|                          |     | strategy                                                                                                                                                                                                     |                                         |
|                          |     | (e) Describe any sensitivity analyses                                                                                                                                                                        | N/A                                     |
| <b>Results</b>           |     |                                                                                                                                                                                                              |                                         |
| Participants             | 13* | (a) Report numbers of individuals at each stage of study—eg numbers potentially eligible, examined for eligibility, confirmed eligible, included in the study, completing follow-up, and analysed            | Pages 5-6                               |
|                          |     | (b) Give reasons for non-participation at each stage                                                                                                                                                         | Pages 5-6                               |
|                          |     | (c) Consider use of a flow diagram                                                                                                                                                                           | Not included                            |
| Descriptive data         | 14* | (a) Give characteristics of study participants (eg demographic, clinical, social) and information on exposures and potential confounders                                                                     | Pages 8-10, Reported in Table 1         |
|                          |     | (b) Indicate number of participants with missing data for each variable of interest                                                                                                                          | Pages 9-10, Reported in Table 1         |
| Outcome data             | 15* | Report numbers of outcome events or summary measures                                                                                                                                                         | Pages 8-10, Reported in Table 1         |
| Main results             | 16  | (a) Give unadjusted estimates and, if applicable, confounder-adjusted estimates and their precision (eg, 95% confidence interval). Make clear which confounders were adjusted for and why they were included | Pages 11-18, and reported in tables 2-4 |
|                          |     | (b) Report category boundaries when continuous variables were categorized                                                                                                                                    | Pages 11-18, and reported in tables 2-4 |
|                          |     | (c) If relevant, consider translating estimates of relative risk into absolute risk for a meaningful time period                                                                                             | N/A                                     |
| Other analyses           | 17  | Report other analyses done—eg analyses of subgroups and interactions, and sensitivity analyses                                                                                                               | Supplement 1, Pages 1-6                 |
| <b>Discussion</b>        |     |                                                                                                                                                                                                              |                                         |
| Key results              | 18  | Summarise key results with reference to study objectives                                                                                                                                                     | Page 19                                 |
| Limitations              | 19  | Discuss limitations of the study, taking into account sources of potential bias or imprecision. Discuss both direction and magnitude of any potential bias                                                   | Page 23                                 |
| Interpretation           | 20  | Give a cautious overall interpretation of results considering objectives, limitations, multiplicity of analyses, results from similar studies, and other relevant evidence                                   | Pages 18-24                             |
| Generalisability         | 21  | Discuss the generalisability (external validity) of the study results                                                                                                                                        | Pages 18-24                             |
| <b>Other information</b> |     |                                                                                                                                                                                                              |                                         |
| Funding                  | 22  | Give the source of funding and the role of the funders for the present study and, if applicable, for the original study on which the present article is based                                                | Page 24                                 |

\*Give information separately for exposed and unexposed groups.

**Note:** An Explanation and Elaboration article discusses each checklist item and gives methodological background and published examples of transparent reporting. The STROBE checklist is best used in conjunction with this article (freely available on the Web sites of PLoS Medicine at <http://www.plosmedicine.org/>, Annals of Internal Medicine at <http://www.annals.org/>, and Epidemiology at <http://www.epidem.com/>). Information on the STROBE Initiative is available at [www.strobe-statement.org](http://www.strobe-statement.org).

# BMJ Open

## The associations between shift work characteristics, shift work schedules, sleep and burnout in North American police officers: a cross-sectional study

|                                 |                                                                                                                                                                                                                                                                                                                                                                                                                                                                                                                                                                                                                                                                                                                                                                                                                                                                                                                                                                                                                                                                                                                                                                                                                                                                                                                                                                                                                            |
|---------------------------------|----------------------------------------------------------------------------------------------------------------------------------------------------------------------------------------------------------------------------------------------------------------------------------------------------------------------------------------------------------------------------------------------------------------------------------------------------------------------------------------------------------------------------------------------------------------------------------------------------------------------------------------------------------------------------------------------------------------------------------------------------------------------------------------------------------------------------------------------------------------------------------------------------------------------------------------------------------------------------------------------------------------------------------------------------------------------------------------------------------------------------------------------------------------------------------------------------------------------------------------------------------------------------------------------------------------------------------------------------------------------------------------------------------------------------|
| Journal:                        | <i>BMJ Open</i>                                                                                                                                                                                                                                                                                                                                                                                                                                                                                                                                                                                                                                                                                                                                                                                                                                                                                                                                                                                                                                                                                                                                                                                                                                                                                                                                                                                                            |
| Manuscript ID                   | bmjopen-2019-030302.R1                                                                                                                                                                                                                                                                                                                                                                                                                                                                                                                                                                                                                                                                                                                                                                                                                                                                                                                                                                                                                                                                                                                                                                                                                                                                                                                                                                                                     |
| Article Type:                   | Research                                                                                                                                                                                                                                                                                                                                                                                                                                                                                                                                                                                                                                                                                                                                                                                                                                                                                                                                                                                                                                                                                                                                                                                                                                                                                                                                                                                                                   |
| Date Submitted by the Author:   | 06-Aug-2019                                                                                                                                                                                                                                                                                                                                                                                                                                                                                                                                                                                                                                                                                                                                                                                                                                                                                                                                                                                                                                                                                                                                                                                                                                                                                                                                                                                                                |
| Complete List of Authors:       | Peterson, Scott; Turner Institute for Brain and Mental Health, School of Psychological Sciences, Monash University<br>Wolkow, Alexander; Turner Institute for Brain and Mental Health, School of Psychological Sciences, Monash University; Paramedic Health and Wellbeing Research Unit, Monash University<br>Lockley, Steven; Turner Institute for Brain and Mental Health, School of Psychological Sciences, Monash University; Division of Sleep and Circadian Disorders, Departments of Medicine and Neurology, Brigham and Women's Hospital<br>O'Brien, Conor; Brigham and Women's Hospital Department of Medicine, Division of Sleep and Circadian Disorders<br>Qadri, Salim; Brigham and Women's Hospital, Division of Sleep and Circadian Disorders, Departments of Medicine and Neurology<br>Sullivan, Jason; Brigham and Women's Hospital, Division of Sleep and Circadian Disorders, Departments of Medicine and Neurology<br>Czeisler, Charles; Brigham and Women's Hospital, Division of Sleep and Circadian Disorders; Harvard Medical School, Division of Sleep Medicine<br>Rajaratnam, Shantha M. W.; Turner Institute for Brain and Mental Health, School of Psychological Sciences, Monash University; Harvard Medical School, Division of Sleep Medicine<br>Barger, Laura; Brigham and Women's Hospital, Division of Sleep and Circadian Disorders; Harvard Medical School, Division of Sleep Medicine |
| <b>Primary Subject Heading</b>: | Occupational and environmental medicine                                                                                                                                                                                                                                                                                                                                                                                                                                                                                                                                                                                                                                                                                                                                                                                                                                                                                                                                                                                                                                                                                                                                                                                                                                                                                                                                                                                    |
| Secondary Subject Heading:      | Mental health                                                                                                                                                                                                                                                                                                                                                                                                                                                                                                                                                                                                                                                                                                                                                                                                                                                                                                                                                                                                                                                                                                                                                                                                                                                                                                                                                                                                              |
| Keywords:                       | MENTAL HEALTH, SLEEP MEDICINE, OCCUPATIONAL & INDUSTRIAL MEDICINE                                                                                                                                                                                                                                                                                                                                                                                                                                                                                                                                                                                                                                                                                                                                                                                                                                                                                                                                                                                                                                                                                                                                                                                                                                                                                                                                                          |
|                                 |                                                                                                                                                                                                                                                                                                                                                                                                                                                                                                                                                                                                                                                                                                                                                                                                                                                                                                                                                                                                                                                                                                                                                                                                                                                                                                                                                                                                                            |

SCHOLARONE™  
Manuscripts

**Title:** The associations between shift work characteristics, shift work schedules, sleep and burnout in North American police officers: a cross-sectional study

**Authors:** Scott A. Peterson, BS<sup>1,†</sup>, Alexander P. Wolkow, PhD<sup>1,2,†</sup>, Steven W. Lockley, PhD<sup>1,3,4</sup>, Conor S. O'Brien, BA<sup>3</sup>, Salim Qadri, BS<sup>3</sup>, Jason P. Sullivan, BS<sup>3</sup>, Charles A. Czeisler, PhD, MD, FRCP<sup>3,4</sup>, Shantha M. W. Rajaratnam, PhD<sup>1,3,4</sup>, Laura K. Barger, PhD<sup>3,4</sup>,

\*

**Author Affiliations:**

<sup>1</sup>Turner Institute for Brain and Mental Health, School of Psychological Sciences, Monash University, Clayton, VIC, Australia

<sup>2</sup>Paramedic Health and Wellbeing Research Unit, Monash University, Frankston, VIC, Australia

<sup>3</sup>Division of Sleep and Circadian Disorders, Departments of Medicine and Neurology, Brigham and Women's Hospital, Boston, MA, USA

<sup>4</sup>Division of Sleep Medicine, Harvard Medical School, Boston, MA, USA

†**Scott A. Peterson and Alexander P. Wolkow contributed equally to this paper**

**\*Corresponding Author:**

Laura K. Barger, PhD

Division of Sleep and Circadian Disorders, Departments of Medicine and Neurology, Brigham and Women's Hospital, 221 Longwood Avenue,

Boston MA 02115

Tel: (617) 732-4013; Fax: (617) 732-4015

1  
2  
3 Email: [laura\\_barger@hms.harvard.edu](mailto:laura_barger@hms.harvard.edu)  
4  
5  
6

7  
8 **Word count:** 4,020  
9  
10  
11  
12  
13  
14  
15  
16  
17  
18  
19  
20  
21  
22  
23  
24  
25  
26  
27  
28  
29  
30  
31  
32  
33  
34  
35  
36  
37  
38  
39  
40  
41  
42  
43  
44  
45  
46  
47  
48  
49  
50  
51  
52  
53  
54  
55  
56  
57  
58  
59  
60

For peer review only

## Abstract

**Objectives:** To examine associations between shift work characteristics and schedules on burnout in police and whether sleep duration and sleepiness were associated with burnout.

**Methods:** Police officers (n=3140) completed the Maslach Burnout Inventory (emotional exhaustion, depersonalisation, personal accomplishment) and self-reported shift schedules (irregular, rotating, fixed), shift characteristics (night, duration, frequency, work hours), sleep duration and sleepiness.

**Results:** Irregular schedules, long shifts ( $\geq 11$  hours), mandatory overtime, short sleep and sleepiness were associated with increased risk of overall burnout in police. Police working a greater frequency of long shifts were more likely to have emotional exhaustion (adjusted odds ratio 1.91, 95% CI 1.35-2.72) than those not working long shifts. Night shifts were associated with depersonalisation (1.32, 1.05-1.66) compared to not working nights. Police working mandatory overtime had increased risk of emotional exhaustion (1.37, 1.14-1.65) than those who did not. Compared to fixed schedules, irregular schedules were associated with emotional exhaustion and depersonalisation (1.91, 1.44-2.54 and 1.39, 1.02-1.89, respectively). Police sleeping  $< 6$  hours were more likely to have emotional exhaustion (1.60, 1.33-1.93) than those sleeping longer, and excessive sleepiness was associated with emotional exhaustion (1.81, 1.50-2.18).

**Conclusions:** Irregular schedules and increased night shifts, sleep disturbances and work hours were related to higher burnout risk in police. Future research should evaluate work schedules in law enforcement that optimise shift duration and frequency, and increase consistency in scheduling and control over work hours to limit burnout in police.

**Key words:** mental health, sleep, burnout, shift work, police

### Strengths and limitations of this study

- The study examined burnout, shift work and sleep in a large sample of police officers (n=3140) from across North America.
- Shift work characteristics and schedules were closely examined in police, providing information on night shifts, long work shifts and long work weeks, overtime (voluntary and mandatory) and different work schedules (irregular, rotating and fixed)
- Sleep and shift information were based on self-reports, and thus may be subject to response bias.
- Due to the cross-sectional design of the study, associations between shift work, sleep and burnout can be inferred but not causality.

Peer review only

## INTRODUCTION

A major source of occupational stress for police officers is shift work, which can involve day, night and long duration shifts and long work weeks,<sup>1,2</sup> as well as rotating, fixed and irregular shift schedules.<sup>3</sup> Chronic exposure to occupational stressors can lead to burnout, which is a psychological syndrome comprising three dimensions: Emotional exhaustion (EE), depersonalisation (DP), and a perceived lack of personal accomplishment (PA).<sup>4</sup> Burnout can have a negative influence on the individual worker, the people whom they serve, and their organisation, with consequences including reduced productivity and decision making,<sup>5</sup> increased absenteeism and risk of leaving the job.<sup>6</sup> Indeed, retirements due to psychological ill health account for 46% of medical retirements among police in the United Kingdom.<sup>7</sup> In North American police, sleep disorders have been associated with increased risk of mental health outcomes, including depression and anxiety, and EE and DP burnout dimensions.<sup>3</sup> In addition to sleep, other work-related factors may also have a negative influence on the health of personnel engaged in shift work, however, few studies have examined how specific characteristics of shift work relate to burnout in police.

Police have traditionally worked 8- to 10-hour shifts in the United States, although increasingly, departments are implementing compressed weekly schedules which involve officers working 11-, 12- and 16-hour shifts.<sup>1,3,8</sup> Long shifts are related to increased sleepiness<sup>8</sup> and may reduce the opportunity for sleep, potentially impairing police officers' ability to recover from work demands.<sup>9</sup> Short sleep has been found to associate with burnout in shift working occupations,<sup>10</sup> including law enforcement,<sup>11</sup> although few studies have examined the relationship between sleepiness and burnout specifically in police. Recovery between shifts may be further restricted by night work, which can cause sleep loss and circadian misalignment, and is shown in other healthcare occupations to confer a greater risk of burnout when compared to day shifts.<sup>10</sup> A high degree of burnout has also been associated

1  
2  
3 with working more night shifts among physicians,<sup>12</sup> and longer duration shifts and work  
4 weeks in nurses<sup>13 14</sup> and emergency medical technicians (EMTs).<sup>15</sup> Although hours of work  
5 were not significantly associated with burnout in resident physicians, burnout was related to  
6 increased difficulty concentrating on work.<sup>16</sup> In police, officers who were continuously  
7 engaged in shift work were reported to have lower PA, but this study did not describe the  
8 relationship between regular shift work and EE or DP, nor did it distinguish between the  
9 different *shift types* in policing,<sup>17</sup> such as night and long duration shifts. Furthermore, police  
10 also work a variety of different schedules including irregular, rotating and fixed shifts,<sup>9</sup> and  
11 often do overtime which may be associated with burnout<sup>18</sup> but to date, the potential  
12 relationship between work schedules and shift characteristics on burnout has not been  
13 systematically examined in police.  
14  
15  
16  
17  
18  
19  
20  
21  
22  
23  
24  
25  
26  
27  
28  
29  
30

31 In this cross-sectional study, we examined whether characteristics of shifts (night, shift  
32 duration, frequency, weekly work and overtime hours) as well as shift schedules (irregular,  
33 rotating, fixed) were associated with burnout in police. Given that short sleep and sleepiness  
34 are also common stressors among police and potential consequences of shift work,<sup>3</sup> a  
35 secondary aim was to investigate associations between sleep duration and sleepiness on  
36 burnout risk in police.  
37  
38  
39  
40  
41  
42  
43  
44  
45  
46

## 47 **METHODS**

### 48 ***Participants***

49  
50  
51 Volunteers were invited to participate through meetings at police departments and  
52 advertisements in police magazines, newsletters and on police-focused websites. In total,  
53 6022 sworn North American police officers expressed interest in the study. Of those, 4957  
54 consented to participate in a survey, either online or, in a few departments, on-site (via  
55  
56  
57  
58  
59  
60



pencil/paper). Participant recruitment and survey administration details have been described previously.<sup>3</sup> The survey assessed demographics and health information and participants reported work and sleep hours in the past 4 weeks and completed the Maslach Burnout Inventory (MBI). Of the 4957 officers who participated, 3140 completed at least one burnout dimension subscale in the MBI and were eligible for analyses. All participants provided informed consent and were eligible for a prize drawing valued up to \$1000 USD.

### **Measures**

Burnout was assessed using the MBI–Human Services Survey,<sup>4</sup> which consists of 22 items that assess the three burnout dimensions: EE, DP, and PA. Participants rated the frequency with which they experienced each item on a 7-point Likert scale (0=never; 6=everyday). EE and DP were defined as dichotomous variables, in which a high (versus low-moderate) risk score for these dimensions were determined (high EE  $\geq 27$  points; high DP  $\geq 13$  points). PA was also a dichotomous variable, but it was scored in the opposite direction to EE and DP, in which low (versus high-moderate) scores indicated low PA ( $\leq 31$  points). Participants were considered to have high *overall burnout* if they had both high EE and DP, with or without low PA.<sup>19</sup>

Work information was determined using items from both the baseline and a concurrent monthly report. Participants were asked how frequently they worked night shifts (shifts involving  $\geq 6$  hours on-duty between 10PM-8AM), with responses from “never or nearly never”, “1-4 times per month”, “1-4 times per week”, and “nearly every day”. To determine the frequency of long work shifts, participants reported the shift length they worked each week for the previous 4 weeks (i.e., 8-10, 11-15, 16-19, 20-23 or  $\geq 24$  hours). Based on previous research in human service occupations,<sup>14</sup> *long work shifts* were classified as  $\geq 11$

1  
2  
3 hours, from which officers were grouped into those working 0, >0 to <2, ≥2 to <4, and ≥4  
4  
5 long shifts per week.  
6  
7  
8  
9

10 Participants' usual shift schedules were categorized as 'fixed', 'irregular', 'rotating' or  
11 'other' schedules. Participants reporting that they "do not have a variable work schedule"  
12 were classified as having 'fixed' schedules. Schedules were categorized as 'rotating' if  
13 officers reported working shifts that rotated on a day-to-evening, day-to-night or evening-to-  
14 night basis. Irregular schedules were defined as shifts that rotated, but did not follow a  
15 consistent pattern, and 'other' comprised schedules that included non-day-to-day rotations  
16 (e.g., weekly/monthly rotations). Total work hours across the month were recorded using a  
17 validated questionnaire,<sup>20</sup> with those recording ≥48 hours per week considered to be working  
18 *long work weeks*. This categorisation was based on prior benchmarking literature in the US  
19 which defines long work weeks as 48 or more hours per week,<sup>21</sup> and research which has  
20 shown this cut-off to be associated with burnout.<sup>22</sup> Participants also recorded if they  
21 completed mandatory and/or voluntary overtime over the last 4 weeks, and the total number  
22 of hours they slept each week for the previous 4 weeks. For sleep duration, the combined  
23 total of the 4 weeks was used to calculate the average sleep duration per 24 hours, and short  
24 sleep was defined as <6 hours sleep per 24 hours. Daytime sleepiness was measured using the  
25 Epworth Sleepiness Scale (ESS; range 0-24), and a score ≥11 indicated excessive  
26 sleepiness.<sup>23</sup>  
27  
28  
29  
30  
31  
32  
33  
34  
35  
36  
37  
38  
39  
40  
41  
42  
43  
44  
45  
46  
47  
48  
49  
50

### 51 ***Statistical analysis***

52 Multiple logistic regression models were used for cross-sectional analysis of associations  
53 between shift work (shift work characteristics and schedules), sleep duration, sleepiness and  
54 burnout (Overall burnout, EE, DP, PA). A multicollinearity assessment using variance  
55  
56  
57  
58  
59  
60

1  
2  
3 inflation factor, correlation coefficient and tolerance values showed no collinearity in the  
4 predictor variables (Supplement 1, Table S1 and Table S2). The models were adjusted for  
5 age, Body Mass Index (BMI), gender, marital status, hypertension, exercise (per week),  
6 cigarette smoking (yes/no), caffeine and alcohol consumption (yes/no during last week),  
7 primary police activity (patrol officer, supervisor/manager, detective), years as police officer,  
8 and seniority. These potentially confounding factors were selected based on prior studies.<sup>3 24-</sup>  
9  
10  
11  
12  
13  
14  
15  
16  
17 <sup>27</sup> Each confounder was tested individually with the burnout outcome, and we only included  
18 those that were significant ( $p < 0.10$ ) in initial models.<sup>28</sup> A backwards elimination method was  
19 then used to remove those that were not significant at the  $< 0.05$  level when all variables were  
20 included in a single model. Factors that remained were used in the first step of a hierarchical  
21 logistic regression model. The predictor variables were then added in the second step of the  
22 model that included the selected confounding factors. Model fit was assessed using the  
23 omnibus test and goodness-of-fit indices ( $-2 \log$  likelihood). Unadjusted and adjusted odds  
24 ratio with 95% Confidence Intervals (CI) are reported. Our analysis included several  
25 multilevel predictors, such as night shift frequency and shift work schedules. For night shift  
26 frequency, we hypothesised a priori that a greater frequency of night shifts would be more  
27 strongly associated with burnout compared to lower frequencies. Therefore, we compared  
28 *never/nearly never* working night shifts to working night shifts *nearly every day* and *1-4*  
29 *times per week* to examine if high frequency compared to low frequency of night shifts were  
30 associated with worse burnout. Furthermore, we hypothesised a priori that more variable shift  
31 work would be related to high burnout, and thus compared *fixed shifts* to all other categories  
32 of shift work (i.e., *irregular*, *rotating* and *other*) to examine whether greater variation in  
33 schedules predicted higher burnout. Statistical analyses were conducted using SPSS (IBM  
34 Corp, Version 24.0, Armonk, NY) and significance set at  $p < 0.05$ .  
35  
36  
37  
38  
39  
40  
41  
42  
43  
44  
45  
46  
47  
48  
49  
50  
51  
52  
53  
54  
55  
56  
57  
58  
59  
60

### Patient and public involvement

The current study was based on secondary data from a pre-existing data set. Therefore, patients and the general public were not involved in the development of the research questions, outcome measures or design of the study.

### RESULTS

Police officers were aged  $38.5 \pm 8.3$  (mean  $\pm$  SD) years and had  $12.7 \pm 8.2$  years of experience in law enforcement. Female officers (16.7%) in our sample were slightly over-represented compared to police in North America (12.2%).<sup>29</sup> The sample was predominantly white (Table 1), with racial and ethnic minority groups slightly under-represented compared to national police statistics.<sup>29</sup> The prevalence of overweight or obesity based on BMI were over-represented in the sample (80.0%) (Table 1) compared to general population data (70%).<sup>30</sup> Overall burnout was found in 17.7% of police. High EE and high DP were observed in 23.8% and 42.6% of the sample respectively, and low PA was observed in 40.7%. In the last month, 56.7% of police worked  $\geq 1$  night shift, 63.9% worked  $\geq 1$  long shift, and 33.6% had an irregular or rotating schedule. Mean total work hours were  $192.27 \pm 74.82$  hours per month, mean mandatory overtime was  $8.26 \pm 14.14$  hours per month, and mean voluntary overtime was  $12.98 \pm 19.83$  hours per month. Short sleep duration was observed in 30.4% of police, and 25.8% had excessive sleepiness (Table 1).

**Table 1.** Participant characteristics

| Characteristic                               | Data          |
|----------------------------------------------|---------------|
| n                                            | 3140          |
| Age, mean (SD) years                         | 38.48 (8.31)  |
| Gender, n (%)                                |               |
| Male                                         | 2609 (83.3)   |
| Female                                       | 523 (16.7)    |
| Not known                                    | 8 (0.3)       |
| Body Mass Index, n (%)                       |               |
| < 25 kg/m <sup>2</sup>                       | 610 (19.4)    |
| ≥ 25 and < 30 kg/m <sup>2</sup>              | 1460 (46.5)   |
| ≥ 30 and < 35 kg/m <sup>2</sup>              | 781 (24.9)    |
| ≥ 35 kg/m <sup>2</sup>                       | 271 (8.6)     |
| Not known                                    | 18 (0.6)      |
| Race, n (%)                                  |               |
| White                                        | 2681 (85.4)   |
| Black                                        | 257 (8.2)     |
| Asian                                        | 34 (1.1)      |
| Native American                              | 21 (0.7)      |
| Pacific Islander                             | 1 (0.03)      |
| Other                                        | 100 (3.2)     |
| Not known                                    | 46 (1.5)      |
| Ethnicity, n (%)                             |               |
| Hispanic                                     | 162 (5.2)     |
| Other                                        | 2806 (89.4)   |
| Not known                                    | 172 (5.5)     |
| Overtime hours per month, mean (SD)          |               |
| Mandatory                                    | 8.26 (14.14)  |
| Voluntary                                    | 12.98 (19.83) |
| Total                                        | 20.50 (24.62) |
| Night shift frequency, n (%)                 |               |
| Never or nearly never                        | 1290 (41.1)   |
| 1-4 per week                                 | 612 (19.5)    |
| 1-4 per month                                | 584 (18.6)    |
| Nearly every day                             | 615 (19.6)    |
| Not known                                    | 39 (1.2)      |
| Long work shifts per week (≥11 hours), n (%) |               |
| None                                         | 390 (12.4)    |
| >0 - <2                                      | 1029 (32.8)   |
| ≥2 - <4                                      | 496 (15.8)    |
| ≥4                                           | 482 (15.4)    |
| Not known                                    | 743 (23.7)    |
| Work hours per week, n (%)                   |               |
| <48 hours                                    | 1820 (58.0)   |
| ≥48 hours                                    | 1260 (40.1)   |
| Not known                                    | 60 (1.9)      |

**Table 1. Continued.**

| Characteristic                                                  | Data        |
|-----------------------------------------------------------------|-------------|
| Usual shift schedule, n (%)                                     |             |
| Fixed                                                           | 1822 (58.0) |
| Irregular                                                       | 274 (8.7)   |
| Rotating                                                        | 782 (24.9)  |
| Other                                                           | 239 (7.6)   |
| Not known                                                       | 23 (0.7)    |
| Average sleep duration over the last 4 weeks*, n (%)            |             |
| <6 h                                                            | 956 (30.4)  |
| ≥6 h                                                            | 1780 (56.7) |
| Not known                                                       | 404 (12.9)  |
| Daytime sleepiness, n (%)                                       |             |
| Normal (<11 ESS) daytime sleepiness                             | 2195 (69.9) |
| Excessive (≥11 ESS) daytime sleepiness                          | 809 (25.8)  |
| Not known                                                       | 136 (4.3)   |
| Burnout, n <sup>‡</sup> (%)                                     |             |
| High EE                                                         | 747 (23.8)  |
| High DP                                                         | 1338 (42.6) |
| Low PA                                                          | 1278 (40.7) |
| Overall burnout <sup>†</sup>                                    | 556 (17.7)  |
| Police officers that had at least 1 dimension of burnout, n (%) |             |
| No                                                              | 1072 (34.1) |
| Yes                                                             | 2068 (65.9) |

\*per 24-hour period; †defined as high EE, high DP, with or without low PA; ‡The burnout characteristics are not mutually exclusive (e.g., a participant could have both high EE and Low PA); EE, emotional exhaustion; DP, depersonalisation; PA, personal accomplishment; ESS, Epworth Sleepiness Scale; SD, standard deviation.

### ***Shift characteristics and burnout***

The odds of high EE increased in a dose-response manner as a function of the number of long shifts worked per week, with police completing  $\geq 4$  long shifts per week having the greatest risk (adjusted odds ratio 1.91, 95% CI 1.35-2.72), compared to no long shifts. A similar relationship was demonstrated for overall burnout, with police working  $>0$  to  $<2$  and  $\geq 4$  long shifts per week more likely to have overall burnout (1.44, 95% CI 1.02-2.02 and 1.78, 95% CI 1.21-2.61, respectively) compared to no long shifts (Table 2); even one long shift per month increased the risk of burnout (1.4- to 1.5-fold increase; Table S3, Table S4 and Table S5). Working  $\geq 48$  hours per week was associated with reduced odds of low PA (0.83, 95% CI 0.71-0.97) compared to shorter weeks. Neither long shift frequency nor weekly work hours were related to DP. Compared to police who never/nearly never work night shifts, those working night shifts nearly every day were at an increased risk of high DP (1.32, 95% CI 1.05-1.66). Working night shifts 1 to 4 times per week was associated with lower odds of low PA (0.79, 95% CI 0.64-0.98) compared to never working nights. Police reporting mandatory overtime had an increased risk of overall burnout (1.40, 95% CI 1.14-1.71), high EE (1.37, 95% CI 1.14-1.65) and DP (1.24, 95% CI 1.04-1.47), whereas voluntary overtime was only associated with high DP (1.19, 95% CI 1.02-1.40). Reporting any overtime (mandatory or voluntary) was also associated with overall burnout (1.36, 95% CI 1.06-1.75) and high DP (1.45, 95% CI 1.20-1.76). Overtime was not related to PA.

### ***Work schedules and burnout***

Police working irregular schedules were at greatest risk of overall burnout (2.12, 95% CI 1.57-2.85), followed by high EE (1.91, 95% CI 1.44-2.54), and high DP (1.39, 95% CI 1.02-1.89) compared to those working fixed schedules. Compared to fixed schedules, police reporting rotating and 'other' schedules were more likely to have EE (1.30, 95% CI 1.06-1.59

1  
2  
3 and 1.44, 95% CI 1.05-1.98, respectively), but these associations were weaker than those  
4  
5 observed for irregular shifts. Furthermore, police working rotating schedules were more  
6  
7 likely to have low PA (1.38, 95% CI 1.15-1.64) compared to fixed shifts. Rotating or 'other'  
8  
9 schedules were not associated with overall burnout or DP, and irregular or 'other' shift  
10  
11 schedules were not related to PA (Table 3).  
12  
13  
14  
15  
16  
17  
18  
19  
20  
21  
22  
23  
24  
25  
26  
27  
28  
29  
30  
31  
32  
33  
34  
35  
36  
37  
38  
39  
40  
41  
42  
43  
44  
45  
46  
47  
48  
49  
50  
51  
52  
53  
54  
55  
56  
57  
58  
59  
60

For peer review only



1  
2 **Table 2.** High burnout outcomes associated with shift work characteristics in police (n=3140)

| Shift work characteristic, n <sup>†</sup> | Positive result in police with burnout, No./No. total (%) |                  | Unadjusted         |         | Adjusted <sup>¶</sup> |         |
|-------------------------------------------|-----------------------------------------------------------|------------------|--------------------|---------|-----------------------|---------|
|                                           | High EE                                                   | Low-moderate EE  | OR (95% CI)        | P Value | OR (95% CI)           | P Value |
|                                           |                                                           |                  |                    |         |                       |         |
| Night shift frequency                     |                                                           |                  |                    |         |                       |         |
| Never/nearly never                        | 290/734 (39.5)                                            | 935/2220 (42.1)  |                    |         |                       |         |
| 1-4 per month                             | 154/734 (21.0)                                            | 435/2220 (19.6)  | 1.14 (0.91 - 1.43) | 0.252   | 1.13 (0.90 - 1.43)    | 0.292   |
| 1-4 per week                              | 141/734 (19.2)                                            | 411/2220 (18.5)  | 1.11 (0.88 - 1.40) | 0.395   | 1.06 (0.84 - 1.35)    | 0.628   |
| Nearly every day                          | 149/734 (20.3)                                            | 439/2220 (19.8)  | 1.09 (0.87 - 1.37) | 0.438   | 1.12 (0.88 - 1.41)    | 0.363   |
| n                                         |                                                           | 2954             |                    |         |                       |         |
| Long work shifts per week (≥11 hours)     |                                                           |                  |                    |         |                       |         |
| 0                                         | 69/575 (12.0)                                             | 296/1719 (17.2)  |                    |         |                       |         |
| >0 - <2                                   | 255/575 (44.3)                                            | 732/1719 (42.6)  | 1.49 (1.11 - 2.01) | 0.008   | 1.48 (1.09 - 2.02)    | 0.013   |
| ≥2 - <4                                   | 123/575 (21.4)                                            | 355/1719 (20.7)  | 1.49 (1.07 - 2.07) | 0.020   | 1.49 (1.05 - 2.11)    | 0.024   |
| ≥4                                        | 128/575 (22.3)                                            | 336/1719 (19.5)  | 1.63 (1.17 - 2.28) | 0.004   | 1.91 (1.35 - 2.72)    | <0.001  |
| n                                         |                                                           | 2294             |                    |         |                       |         |
| Long work weeks                           |                                                           |                  |                    |         |                       |         |
| <48 hours                                 | 417/731 (40.9)                                            | 1303/2204 (59.1) |                    |         |                       |         |
| ≥48 hours                                 | 314/731 (43.0)                                            | 901/2204 (40.9)  | 1.09 (0.92 - 1.29) | 0.324   | 1.14 (0.96 - 1.36)    | 0.141   |
| n                                         |                                                           | 2935             |                    |         |                       |         |
| Mandatory overtime                        |                                                           |                  |                    |         |                       |         |
| No                                        | 305/653 (46.7)                                            | 1056/1911 (55.3) |                    |         |                       |         |
| Yes                                       | 348/653 (53.3)                                            | 855/1911 (44.7)  | 1.41 (1.18 - 1.68) | <0.001  | 1.37 (1.14 - 1.65)    | 0.001   |
| n                                         |                                                           | 2564             |                    |         |                       |         |
| Voluntary overtime                        |                                                           |                  |                    |         |                       |         |
| No                                        | 306/646 (47.4)                                            | 881/1935 (45.5)  |                    |         |                       |         |
| Yes                                       | 340/646 (52.6)                                            | 1054/1935 (54.5) | 0.93 (0.78 - 1.11) | 0.417   | 0.94 (0.78 - 1.12)    | 0.475   |
| n                                         |                                                           | 2581             |                    |         |                       |         |
| Any overtime (Mandatory or voluntary)     |                                                           |                  |                    |         |                       |         |
| No                                        | 143/618 (23.1)                                            | 487/1799 (27.1)  |                    |         |                       |         |
| Yes                                       | 475/618 (76.9)                                            | 1312/1799 (72.9) | 1.23 (1.00 - 1.53) | 0.055   | 1.21 (0.97 - 1.50)    | 0.095   |
| n                                         |                                                           | 2417             |                    |         |                       |         |
|                                           | High DP                                                   | Low-moderate DP  |                    |         |                       |         |
| Night shift frequency                     |                                                           |                  |                    |         |                       |         |
| Never/nearly never                        | 481/1320 (36.4)                                           | 771/1700 (45.4)  |                    |         |                       |         |
| 1-4 per month                             | 285/1320 (21.6)                                           | 316/1700 (18.6)  | 1.45 (1.19 - 1.76) | <0.001  | 1.21 (0.96 - 1.51)    | 0.101   |
| 1-4 per week                              | 254/1320 (19.2)                                           | 314/1700 (18.5)  | 1.30 (1.06 - 1.86) | 0.011   | 1.07 (0.84 - 1.35)    | 0.592   |
| Nearly every day                          | 300/1320 (22.7)                                           | 299/1700 (17.6)  | 1.61 (1.32 - 1.96) | <0.001  | 1.32 (1.05 - 1.66)    | 0.018   |
| n                                         |                                                           | 3020             |                    |         |                       |         |
| Long work shifts per week (≥11 hours)     |                                                           |                  |                    |         |                       |         |
| 0                                         | 151/1027 (14.7)                                           | 226/1316 (17.2)  |                    |         |                       |         |
| >0 - <2                                   | 476/1027 (46.3)                                           | 535/1316 (40.7)  | 1.33 (1.05 - 1.69) | 0.019   | 1.20 (0.93 - 1.54)    | 0.157   |
| ≥2 - <4                                   | 218/1027 (21.2)                                           | 268/1316 (20.4)  | 1.22 (0.93 - 1.60) | 0.157   | 1.09 (0.81 - 1.45)    | 0.578   |
| ≥4                                        | 182/1027 (17.7)                                           | 287/1316 (21.8)  | 0.95 (0.72 - 1.25) | 0.712   | 0.96 (0.71 - 1.29)    | 0.804   |
| n                                         |                                                           | 2343             |                    |         |                       |         |
| Long work weeks                           |                                                           |                  |                    |         |                       |         |
| <48 hours                                 | 789/1325 (59.5)                                           | 976/1674 (58.3)  |                    |         |                       |         |
| ≥48 hours                                 | 536/1325 (40.5)                                           | 698/1674 (41.7)  | 0.95 (0.82 - 1.10) | 0.492   | 0.98 (0.83 - 1.15)    | 0.779   |
| n                                         |                                                           | 2999             |                    |         |                       |         |
| Mandatory overtime                        |                                                           |                  |                    |         |                       |         |
| No                                        | 568/1199 (47.4)                                           | 814/1424 (57.2)  |                    |         |                       |         |
| Yes                                       | 631/1199 (52.6)                                           | 610/1424 (42.8)  | 1.48 (1.27 - 1.73) | <0.001  | 1.24 (1.04 - 1.47)    | 0.014   |
| n                                         |                                                           | 2623             |                    |         |                       |         |
| Voluntary overtime                        |                                                           |                  |                    |         |                       |         |
| No                                        | 521/1196 (43.6)                                           | 694/1444 (48.1)  |                    |         |                       |         |
| Yes                                       | 675/1196 (56.4)                                           | 750/1444 (51.9)  | 1.20 (1.03 - 1.40) | 0.021   | 1.19 (1.02 - 1.40)    | 0.030   |
| n                                         |                                                           | 2640             |                    |         |                       |         |
| Any overtime (Mandatory or voluntary)     |                                                           |                  |                    |         |                       |         |
| No                                        | 235/1130 (20.8)                                           | 406/1345 (30.2)  |                    |         |                       |         |
| Yes                                       | 895/1130 (79.2)                                           | 939/1345 (69.8)  | 1.65 (1.37 - 1.98) | <0.001  | 1.45 (1.20 - 1.76)    | <0.001  |
| n                                         |                                                           | 2475             |                    |         |                       |         |

Table 2. Continued

| Shift work characteristic, n <sup>†,‡</sup> | Positive result in police with high burnout, No./No. total (%) |                    | Unadjusted         |         | Adjusted <sup>¶</sup> |         |
|---------------------------------------------|----------------------------------------------------------------|--------------------|--------------------|---------|-----------------------|---------|
|                                             | Low PA                                                         | Moderate-high PA   | OR (95% CI)        | P Value | OR (95% CI)           | P Value |
| Night shift frequency                       |                                                                |                    |                    |         |                       |         |
| Never/nearly never                          | 532/1259 (42.3)                                                | 676/1674 (40.4)    |                    |         |                       |         |
| 1-4 per month                               | 247/1259 (19.6)                                                | 329/1674 (19.7)    | 0.95 (0.78 - 1.17) | 0.645   | 0.94 (0.76 - 1.15)    | 0.544   |
| 1-4 per week                                | 220/1259 (17.5)                                                | 341/1674 (20.4)    | 0.82 (0.67 - 1.01) | 0.056   | 0.79 (0.64 - 0.98)    | 0.029   |
| Nearly every day                            | 260/1259 (20.7)                                                | 328/1674 (19.6)    | 1.01 (0.83 - 1.23) | 0.943   | 0.92 (0.75 - 1.12)    | 0.401   |
| n                                           |                                                                | 2933               |                    |         |                       |         |
| Long work shifts per week (≥11 hours)       |                                                                |                    |                    |         |                       |         |
| 0                                           | 167/962 (17.4)                                                 | 201/1314 (15.3)    |                    |         |                       |         |
| >0 - <2                                     | 426/962 (44.3)                                                 | 557/1314 (42.4)    | 0.92 (0.72 - 1.17) | 0.500   | 0.90 (0.69 - 1.16)    | 0.399   |
| ≥2 - <4                                     | 193/962 (20.1)                                                 | 280/1314 (21.3)    | 0.83 (0.63 - 1.09) | 0.183   | 0.84 (0.63 - 1.12)    | 0.234   |
| ≥4                                          | 176/962 (18.3)                                                 | 276/1314 (21.0)    | 0.77 (0.58 - 1.02) | 0.063   | 0.77 (0.57 - 1.04)    | 0.085   |
| n                                           |                                                                | 2276               |                    |         |                       |         |
| Long work weeks                             |                                                                |                    |                    |         |                       |         |
| <48 hours                                   | 770/1248 (61.7)                                                | 952/1670 (57.0)    |                    |         |                       |         |
| ≥48 hours                                   | 478/1248 (38.3)                                                | 718/1670 (43.0)    | 0.82 (0.71 - 0.96) | 0.011   | 0.83 (0.71 - 0.97)    | 0.017   |
| n                                           |                                                                | 2918               |                    |         |                       |         |
| Mandatory overtime                          |                                                                |                    |                    |         |                       |         |
| No                                          | 562/1092 (51.5)                                                | 781/1463 (53.4)    |                    |         |                       |         |
| Yes                                         | 530/1092 (48.5)                                                | 682/1463 (46.6)    | 1.08 (0.92 - 1.26) | 0.337   | 1.01 (0.86 - 1.18)    | 0.935   |
| n                                           |                                                                | 2555               |                    |         |                       |         |
| Voluntary overtime                          |                                                                |                    |                    |         |                       |         |
| No                                          | 524/1093 (47.9)                                                | 660/1478 (47.9)    |                    |         |                       |         |
| Yes                                         | 569/1093 (52.1)                                                | 818/1478 (55.3)    | 0.88 (0.75 - 1.03) | 0.098   | 0.89 (0.76 - 1.05)    | 0.156   |
| n                                           |                                                                | 2571               |                    |         |                       |         |
| Any overtime (Mandatory or voluntary)       |                                                                |                    |                    |         |                       |         |
| No                                          | 263/1030 (25.5)                                                | 357/1379 (25.9)    |                    |         |                       |         |
| Yes                                         | 767/1030 (74.5)                                                | 1022/1379 (74.5)   | 1.02 (0.85 - 1.23) | 0.844   | 0.96 (0.80 - 1.17)    | 0.704   |
| n                                           |                                                                | 2409               |                    |         |                       |         |
|                                             | Overall burnout                                                | No overall burnout |                    |         |                       |         |
| Night shift frequency                       |                                                                |                    |                    |         |                       |         |
| Never/nearly never                          | 202/545 (37.1)                                                 | 1085/2547 (42.6)   |                    |         |                       |         |
| 1-4 per month                               | 121/545 (22.2)                                                 | 489/2547 (19.2)    | 1.32 (1.04 - 1.71) | 0.025   | 1.25 (0.97 - 1.61)    | 0.092   |
| 1-4 per week                                | 110/545 (20.2)                                                 | 473/2547 (18.6)    | 1.25 (0.97 - 1.61) | 0.089   | 1.11 (0.85 - 1.14)    | 0.449   |
| Nearly every day                            | 112/545 (20.6)                                                 | 500/2547 (19.6)    | 1.20 (0.93 - 1.55) | 0.154   | 1.12 (0.86 - 1.45)    | 0.407   |
| n                                           |                                                                | 3092               |                    |         |                       |         |
| Long work shifts per week (≥11 hours)       |                                                                |                    |                    |         |                       |         |
| 0                                           | 51/426 (12.0)                                                  | 338/1967 (17.2)    |                    |         |                       |         |
| >0 - <2                                     | 191/426 (44.8)                                                 | 835/1967 (42.5)    | 1.52 (1.09 - 2.12) | 0.015   | 1.44 (1.02 - 2.02)    | 0.038   |
| ≥2 - <4                                     | 88/426 (20.7)                                                  | 408/1967 (20.7)    | 1.43 (0.98 - 2.08) | 0.061   | 1.36 (0.93 - 2.00)    | 0.116   |
| ≥4                                          | 96/426 (22.5)                                                  | 386/1967 (19.6)    | 1.65 (1.14 - 2.39) | 0.008   | 1.78 (1.21 - 2.61)    | 0.003   |
| n                                           |                                                                | 2393               |                    |         |                       |         |
| Long work weeks                             |                                                                |                    |                    |         |                       |         |
| <48 hours                                   | 309/547 (56.5)                                                 | 1503/2524 (59.5)   |                    |         |                       |         |
| ≥48 hours                                   | 238/547 (43.5)                                                 | 1021/2524 (40.5)   | 1.13 (0.94 - 1.37) | 0.188   | 1.13 (0.94 - 1.37)    | 0.201   |
| n                                           |                                                                | 3071               |                    |         |                       |         |
| Mandatory overtime                          |                                                                |                    |                    |         |                       |         |
| No                                          | 222/496 (44.8)                                                 | 1196/2178 (54.9)   |                    |         |                       |         |
| Yes                                         | 274/496 (55.2)                                                 | 982/2178 (45.1)    | 1.50 (1.24 - 1.83) | <0.001  | 1.40 (1.14 - 1.71)    | 0.001   |
| n                                           |                                                                | 2674               |                    |         |                       |         |
| Voluntary overtime                          |                                                                |                    |                    |         |                       |         |
| No                                          | 225/489 (46.0)                                                 | 1016/2201 (46.2)   |                    |         |                       |         |
| Yes                                         | 264/489 (54.0)                                                 | 1185/2201 (53.8)   | 1.01 (0.83 - 1.23) | 0.952   | 1.01 (0.83 - 1.24)    | 0.910   |
| n                                           |                                                                | 2690               |                    |         |                       |         |
| Any overtime (Mandatory or voluntary)       |                                                                |                    |                    |         |                       |         |
| No                                          | 97/471 (20.6)                                                  | 564/2048 (27.5)    |                    |         |                       |         |
| Yes                                         | 374/471 (79.4)                                                 | 1484/2048 (72.5)   | 1.56 (1.31 - 1.87) | <0.001  | 1.36 (1.06 - 1.75)    | 0.014   |
| n                                           |                                                                | 2519               |                    |         |                       |         |

1  
2 EE, emotional exhaustion; DP, depersonalisation; PA, personal accomplishment; OR, odds ratio; CI, confidence  
3 interval; †The *n* presented represents the sample for each unadjusted analysis. The *n* for the adjusted analyses are in  
4 Supplement 1, Table S6; ‡Some participants did not provide sufficient information from which to determine their  
5 shift work characteristics. The *n* presented are from those who answered sufficiently; ¶Adjusted for age, BMI, gender,  
6 marital status, hypertension, cigarette use, caffeine use, alcohol, second job, primary activity, years as police officer,  
7 exercise frequency, and seniority. Variables included in each model are in Supplement 1, Table S6, and model fit is  
8 reported in Supplement 1, Table S7.  
9  
10  
11  
12  
13  
14  
15  
16  
17  
18  
19  
20  
21  
22  
23  
24  
25  
26  
27  
28  
29  
30  
31  
32  
33  
34  
35  
36  
37  
38  
39  
40  
41  
42  
43  
44  
45  
46  
47  
48  
49  
50  
51  
52  
53  
54  
55  
56  
57  
58  
59  
60

For peer review only

**Table 3.** High burnout outcomes associated with shift work schedules in police (n=3140)

| Shift work schedule, n <sup>†,‡</sup> | Positive result in police with high burnout,<br>No./No. total (%) |                    | Unadjusted         |         | Adjusted <sup>¶</sup> |         |
|---------------------------------------|-------------------------------------------------------------------|--------------------|--------------------|---------|-----------------------|---------|
|                                       |                                                                   |                    | OR (95% CI)        | P Value | OR (95% CI)           | P Value |
|                                       | High EE                                                           | Low-moderate EE    |                    |         |                       |         |
| Fixed                                 | 382/743 (51.4)                                                    | 1366/2227 (61.3)   |                    |         |                       |         |
| Irregular                             | 96/743 (12.9)                                                     | 168/2227 (7.5)     | 2.04 (1.55 - 2.69) | <0.001  | 1.91 (1.44 - 2.54)    | <0.001  |
| Rotating                              | 200/743 (26.9)                                                    | 534/2227 (24.0)    | 1.34 (1.10 - 1.63) | 0.004   | 1.30 (1.06 - 1.59)    | 0.011   |
| Other                                 | 65/743 (8.7)                                                      | 159/2227 (7.1)     | 1.46 (1.07 - 1.99) | 0.016   | 1.44 (1.05 - 1.98)    | 0.024   |
| <i>n</i>                              | 2970                                                              |                    |                    |         |                       |         |
|                                       | High DP                                                           | Low-moderate DP    |                    |         |                       |         |
| Fixed                                 | 740/1331 (55.6)                                                   | 1038/1703 (61.0)   |                    |         |                       |         |
| Irregular                             | 146/1331 (11.0)                                                   | 117/1703 (6.9)     | 1.75 (1.35 - 2.27) | <0.001  | 1.39 (1.02 - 1.89)    | 0.038   |
| Rotating                              | 343/1331 (25.8)                                                   | 416/1703 (24.4)    | 1.16 (0.96 - 1.37) | 0.096   | 0.97 (0.80 - 1.18)    | 0.830   |
| Other                                 | 102/1331 (7.7)                                                    | 132/1703 (7.8)     | 1.08 (0.82 - 1.43) | 0.566   | 1.07 (0.78 - 1.45)    | 0.665   |
| <i>n</i>                              | 3034                                                              |                    |                    |         |                       |         |
|                                       | Low PA                                                            | Moderate-high PA   |                    |         |                       |         |
| Fixed                                 | 695/1271 (54.7)                                                   | 1030/1679 (61.3)   |                    |         |                       |         |
| Irregular                             | 107/1271 (8.4)                                                    | 158/1679 (9.4)     | 1.00 (0.77 - 1.31) | 0.978   | 0.97 (0.74 - 1.27)    | 0.845   |
| Rotating                              | 366/1271 (28.8)                                                   | 370/1679 (22.0)    | 1.47 (1.23 - 1.74) | <0.001  | 1.38 (1.15 - 1.64)    | <0.001  |
| Other                                 | 103/1271 (8.1)                                                    | 121/1679 (7.2)     | 1.26 (0.95 - 1.67) | 0.104   | 1.27 (0.96 - 1.69)    | 0.100   |
| <i>n</i>                              | 2950                                                              |                    |                    |         |                       |         |
|                                       | Overall burnout                                                   | No overall burnout |                    |         |                       |         |
| Fixed                                 | 279/553 (50.5)                                                    | 1539/2555 (60.2)   |                    |         |                       |         |
| Irregular                             | 82/553 (14.8)                                                     | 192/2555 (7.5)     | 2.36 (1.77 - 3.14) | <0.001  | 2.12 (1.57 - 2.85)    | <0.001  |
| Rotating                              | 146/553 (26.4)                                                    | 632/2555 (24.7)    | 1.27 (1.02 - 1.59) | 0.031   | 1.24 (0.99 - 1.56)    | 0.065   |
| Other                                 | 46/553 (8.3)                                                      | 192/2555 (7.5)     | 1.32 (0.94 - 1.87) | 0.114   | 1.30 (0.91 - 1.84)    | 0.153   |
| <i>n</i>                              | 3108                                                              |                    |                    |         |                       |         |

EE, emotional exhaustion; DP, depersonalisation; PA, personal accomplishment; OR, odds ratio; CI, confidence interval; <sup>†</sup>The *n* presented represents the sample for each unadjusted analysis. The *n* for the adjusted analyses are in Supplement 1, Table S6; <sup>‡</sup>Some participants did not provide sufficient information from which to determine their shift work schedule. The *n* presented are from those who answered sufficiently; <sup>¶</sup>Adjusted for age, BMI, gender, marital status, hypertension, cigarette use, caffeine use, alcohol use, second job, primary activity, years as police officer, exercise frequency, and seniority. Variables included in each model are in Supplement 1, Table S6, and model fit is reported in Supplement 1, Table S7.

### *Sleep and burnout*

Police who reported, on average, short sleep (<6 hours) were more likely to have overall burnout (1.49, 95% CI 1.21-1.81), high EE (1.60, 95% CI 1.33-1.93) and low PA (1.24, 95% CI 1.05-1.47) compared to those sleeping  $\geq 6$  hours. Short sleep was not associated with DP (Table 4). Police with excessive sleepiness were more likely to have overall burnout (1.72, 95% CI 1.41-2.11), high EE (1.81, 95% CI 1.50-2.18) and high DP (1.48, 95% CI 1.23-1.78) compared to police with normal sleepiness (Table 4).

**Table 4.** High burnout outcomes associated with sleep duration and sleepiness in police (n=3140)

| Sleep characteristics, n <sup>†,‡</sup> | Positive result in police with high burnout, No./No. total (%) |                    | Unadjusted         |         | Adjusted <sup>¶</sup> |         |
|-----------------------------------------|----------------------------------------------------------------|--------------------|--------------------|---------|-----------------------|---------|
|                                         | High EE                                                        | Low-moderate EE    | OR (95% CI)        | P Value | OR (95% CI)           | P Value |
|                                         | High EE                                                        | Low-moderate EE    |                    |         |                       |         |
| Sleep duration                          |                                                                |                    |                    |         |                       |         |
| ≥6 hours per night                      | 371/654 (56.7)                                                 | 1334/1956 (68.2)   |                    |         |                       |         |
| <6 hours per night                      | 283/654 (43.3)                                                 | 622/1956 (31.8)    | 1.64 (1.36 - 1.96) | <0.001  | 1.60 (1.33 - 1.93)    | <0.001  |
| n                                       |                                                                | 2610               |                    |         |                       |         |
| Sleepiness                              |                                                                |                    |                    |         |                       |         |
| <11 ESS                                 | 451/714 (63.2)                                                 | 1652/2158 (76.6)   |                    |         |                       |         |
| ≥11 ESS                                 | 263/714 (36.8)                                                 | 506/2158 (23.4)    | 1.90 (1.59 - 2.28) | <0.001  | 1.81 (1.50 - 2.18)    | <0.001  |
| n                                       |                                                                | 2872               |                    |         |                       |         |
|                                         | High DP                                                        | Low-moderate DP    |                    |         |                       |         |
| Sleep duration                          |                                                                |                    |                    |         |                       |         |
| ≥6 hours per night                      | 755/1206 (62.6)                                                | 989/1469 (67.3)    |                    |         |                       |         |
| <6 hours per night                      | 451/1206 (37.4)                                                | 480/1469 (32.7)    | 1.23 (1.05 - 1.44) | 0.011   | 1.13 (0.96 - 1.33)    | 0.151   |
| n                                       |                                                                | 2675               |                    |         |                       |         |
| Sleepiness                              |                                                                |                    |                    |         |                       |         |
| <11 ESS                                 | 875/1286 (68.0)                                                | 1267/1639 (77.3)   |                    |         |                       |         |
| ≥11 ESS                                 | 411/1286 (32.0)                                                | 372/1639 (22.7)    | 1.60 (1.38 - 1.89) | <0.001  | 1.48 (1.23 - 1.78)    | <0.001  |
| n                                       |                                                                | 2925               |                    |         |                       |         |
|                                         | Low PA                                                         | Moderate-high PA   |                    |         |                       |         |
| Sleep duration                          |                                                                |                    |                    |         |                       |         |
| ≥6 hours per night                      | 670/1077 (62.2)                                                | 1024/1524 (67.2)   |                    |         |                       |         |
| <6 hours per night                      | 407/1077 (37.8)                                                | 500/1524 (32.8)    | 1.24 (1.06 - 1.46) | 0.009   | 1.24 (1.05 - 1.47)    | 0.011   |
| n                                       |                                                                | 2601               |                    |         |                       |         |
| Sleepiness                              |                                                                |                    |                    |         |                       |         |
| <11 ESS                                 | 867/1224 (70.8)                                                | 1213/1627 (74.6)   |                    |         |                       |         |
| ≥11 ESS                                 | 357/1224 (29.2)                                                | 414/1627 (25.4)    | 1.21 (1.02 - 1.43) | 0.027   | 1.18 (0.99 - 1.41)    | 0.061   |
| n                                       |                                                                | 2851               |                    |         |                       |         |
|                                         | Overall burnout                                                | No overall burnout |                    |         |                       |         |
| Sleep duration                          |                                                                |                    |                    |         |                       |         |
| ≥6 hours per night                      | 279/491 (56.8)                                                 | 1497/2238 (66.9)   |                    |         |                       |         |
| <6 hours per night                      | 212/491 (43.2)                                                 | 741/2238 (33.1)    | 1.54 (1.26 - 1.87) | <0.001  | 1.49 (1.21 - 1.81)    | <0.001  |
| n                                       |                                                                | 2729               |                    |         |                       |         |
| Sleepiness                              |                                                                |                    |                    |         |                       |         |
| <11 ESS                                 | 338/532 (63.5)                                                 | 1852/2464 (75.2)   |                    |         |                       |         |
| ≥11 ESS                                 | 194/532 (36.5)                                                 | 612/2464 (24.8)    | 1.74 (1.42 - 2.12) | <0.001  | 1.72 (1.41 - 2.11)    | <0.001  |
| n                                       |                                                                | 2996               |                    |         |                       |         |

EE, emotional exhaustion; DP, depersonalisation; PA, personal accomplishment; ESS, Epworth Sleepiness Scale; OR, odds ratio; CI, confidence interval; <sup>†</sup>The *n* presented represents the sample for each unadjusted analysis. The *n* for the adjusted analyses are in Supplement 1, Table S6; <sup>‡</sup>Some participants did not provide sufficient information from which to determine their sleep duration and sleepiness. The *n* presented are from those who answered sufficiently; <sup>¶</sup>Adjusted for age, BMI, gender, marital status, hypertension, cigarette use, caffeine use, alcohol use, second job, primary activity, years as police officer, exercise frequency, and seniority. Variables included in each model are in Supplement 1, Table S6, and model fit is reported in Supplement 1, Table S7.

## DISCUSSION

In this sample of North American police officers, 17% exhibited overall burnout, which is higher than the 10% previously observed in office workers.<sup>19</sup> Two-thirds of the sample (65.9%) were also found to have at least one dimension of burnout, and this too exceeds levels reported in other human service occupations and the general population.<sup>31</sup> Long shifts, mandatory overtime, short sleep and sleepiness were each associated with significantly increased risk of overall burnout in police. Among the different schedules, officers working irregular shifts had a 2-fold higher risk of overall burnout, demonstrating the risk of burnout associated with this schedule for the first time in police. For individual dimensions of burnout, almost half of police had high depersonalisation (43%), the same was true for low personal accomplishment (41%), while nearly a quarter had high emotional exhaustion (24%). The prevalence of DP was higher in this sample of police compared to the US general population (15%), and EE levels were similar to general population data (23%).<sup>31</sup> The risk of EE was higher in police working a greater frequency of long shifts, and working night shifts nearly every day were associated with an increased risk of DP. Long work weeks were associated with reduced odds of low PA, and mandatory, but not voluntary, overtime increased EE. There was an increased likelihood of EE and PA among police reporting short sleep, and an increased risk for EE and DP in those with excessive sleepiness.

Police regularly completing long work shifts were at increased risk of overall burnout and high EE. Previous studies in nurses have reported similar associations between increased hours of work on the most recent shift and high burnout.<sup>13 14</sup> We expand on these findings by demonstrating how the risk of EE is dependent on the number of long shifts worked, with

1  
2  
3 working  $\geq 4$  long shifts associated with nearly double the risk of EE. Working  $\geq 1$  long shift per  
4  
5 month and  $\geq 4$  long shifts per week were also associated with high EE and overall burnout, but  
6  
7 the risk conferred by other shift frequencies (i.e.,  $>0$  to  $<2$ ,  $2$  to  $<4$  long shifts per week) was less  
8  
9 consistent for these aspects of burnout. Working  $\geq 48$  hours per week was associated with  
10  
11 reduced odds of low PA in police, which contrasts research in physicians using a similar  
12  
13 definition of weekly work hours,<sup>22</sup> as well as a prior study in UK police that defined long work  
14  
15 weeks using a slightly higher threshold ( $\geq 49$  hours per week).<sup>27</sup> Long work weeks and night  
16  
17 shifts (1 to 4 per week) were the only shift characteristics in this study associated with reduced  
18  
19 odds of low PA. Although these findings were unexpected, they may highlight certain aspects of  
20  
21 shift work in policing that allow personnel to feel effective and a sense of accomplishment in  
22  
23 their work, but further research that explores the relationships between PA and weekly night  
24  
25 shifts (e.g., comparing 1-2 and 3-4 night shifts per week) and work hours (e.g.,  $\geq 49$  or  $\geq 60$   
26  
27 hours) in more detail is needed to confirm these findings. Compared to weekly work hours,  
28  
29 however, the associations between long work shifts and burnout were positive, typically stronger  
30  
31 and affected more burnout dimensions. This is an important detail, as it demonstrates how the  
32  
33 distribution of work hours, not just total overall hours, influences burnout in police. This  
34  
35 suggests the need for shorter and less compressed shifts that spread work hours across the week  
36  
37 to reduce burnout. For instance, Amendola et al.<sup>8</sup> found that police working 10-hour shifts  
38  
39 reported longer sleep and higher quality of work-life balance compared 8- or 12-hour shifts,  
40  
41 although burnout was not examined in that study. Further research is needed to examine whether  
42  
43 shortening shift lengths, as well as limiting the frequency of long work shifts, also reduces  
44  
45 burnout in police as it has been shown in EMTs.<sup>15</sup>  
46  
47  
48  
49  
50  
51  
52  
53  
54  
55  
56  
57  
58  
59  
60



1  
2  
3 Mandatory overtime was associated with an increased risk of overall burnout, high EE, and DP  
4 among police. Conversely, voluntary overtime was not associated with EE or overall burnout,  
5 but was associated with high DP. A prior study in police failed to show a relationship between  
6 overtime (combined voluntary and mandatory) and burnout.<sup>18</sup> The results of our study suggest  
7 the control a police officer has over overtime may influence how closely this shift characteristic  
8 is associated with burnout, in particular overall burnout and EE. This interpretation is supported  
9 by research from Beckers *et al.*<sup>32</sup> in full-time workers who reported involuntary overtime was  
10 associated with high emotional fatigue and low job satisfaction, and classified involuntary  
11 overtime workers as a burnout risk group. In their study, Becker and colleagues<sup>32</sup> did not  
12 examine DP, but based on our findings in police, it is possible that voluntary (and mandatory)  
13 overtime may pose a risk to this dimension. Further research determining the specific durations  
14 of overtime associated with high burnout and which dimensions of burnout is needed to inform  
15 policies regarding the safe provision of work hours in excess of normal shift lengths.  
16  
17  
18  
19  
20  
21  
22  
23  
24  
25  
26  
27  
28  
29  
30  
31  
32  
33  
34

35 Increased frequency of night shifts was associated with high DP in police, but not overall  
36 burnout or EE. Research has reported associations between increased night work and burnout in  
37 healthcare personnel, but only for overall burnout and EE.<sup>12 33</sup> Furthermore, the rate of night  
38 shifts per month was not found to associate with burnout among healthcare workers.<sup>33</sup> These  
39 inconsistencies may reflect differences among human service professions and perhaps their  
40 physical environments (e.g., lighting levels that affect mood and alertness)<sup>34</sup> that may impact the  
41 manifestation of burnout dimensions. For instance, healthcare workers typically develop higher  
42 rates of EE,<sup>35</sup> whereas police report greater DP,<sup>36</sup> as demonstrated in the current study. High DP  
43 reflects a critical relationship between people and their work, as it refers to negative feelings and  
44  
45  
46  
47  
48  
49  
50  
51  
52  
53  
54  
55  
56  
57  
58  
59  
60

1  
2  
3 attitudes toward one's clients.<sup>4</sup> Therefore, high DP in police could be due to the difficult nature  
4  
5 of some of the people with whom police interact. In addition to sleep disruption with night work,  
6  
7 police encounter more stressful events at night.<sup>37</sup> Sleep is further disrupted among people with  
8  
9 untreated sleep disorders, and common sleep disorders are shown to increase the likelihood of  
10  
11 police demonstrating anger towards suspects or citizens.<sup>3</sup> Thus, the combination of poor mood,  
12  
13 sleep and difficult clients may explain the increased risk of DP associated with regular night  
14  
15 work in police. Further research comparing police attitudes towards clients with whom they  
16  
17 interact at night compared to the day is needed to understand the mechanisms underpinning the  
18  
19 increased risk of DP conferred by night shifts in police.  
20  
21  
22  
23  
24  
25

26 Police officers who reported short sleep had a greater risk of overall burnout, high EE and low  
27  
28 PA, while sleepiness increased the likelihood for EE, DP and overall burnout. Similar sleepiness  
29  
30 levels have been related to high burnout in medical students.<sup>26</sup> Our findings for sleep duration are  
31  
32 also consistent with research showing short sleep over a month increases overall burnout in  
33  
34 police.<sup>11</sup> Inadequate sleep may impair police officers' ability to recover from occupational  
35  
36 demands, potentially explaining the heightened burnout risk in those reporting short sleep in this  
37  
38 study. Achieving sufficient sleep can be difficult when working at night and/or long hours, as  
39  
40 these shifts may limit sleep opportunities at night and involve attempts by the shift worker to  
41  
42 sleep at times of the day when alertness levels are high (and sleep propensity is low).<sup>38</sup> Indeed,  
43  
44 when restricting the sample to police regularly completing long shifts, officers reporting short  
45  
46 sleep and excessive sleepiness had a 2-fold increased risk of EE (Table S8, Table S4 and Table  
47  
48 S5). These findings highlight the health burden of sleepiness and sleep loss in law enforcement,  
49  
50 and the need for interventions that address sleep in addition to optimising shift schedules.  
51  
52  
53  
54  
55  
56  
57  
58  
59  
60

1  
2  
3  
4  
5 Police working irregular shifts were more likely to have overall burnout, high EE and DP  
6 compared to officers working fixed shifts. Canadian workers completing non-standard schedules  
7 (shifts other than fixed 9AM-5PM) have also been found to have increased overall burnout and  
8 EE,<sup>39</sup> but to our knowledge, this is the only other study to have investigated the relationship  
9 between irregular or non-standard schedules and burnout. A growing body of research suggests  
10 that greater variability in sleep duration and bedtimes predict worse mental health.<sup>40</sup> Workers  
11 with irregular shifts are likely to have more variability in their sleep patterns,<sup>41</sup> which in turn,  
12 may explain the increased burnout risk among police engaged in this schedule. Considering 8.7%  
13 of our sample worked irregular shifts, our findings may have implications for arranging work  
14 schedules to limit irregular shifts to reduce burnout. Rotating shifts were also common among  
15 police in our study (24.9%), and associated with high EE and low PA. Conversely, nurses  
16 working fixed shifts compared to rotating schedules are reported to have greater EE and DP,<sup>42</sup>  
17 but not low PA, with those working fixed night and morning shifts showing the highest levels of  
18 EE and DP.<sup>43</sup> The hazards related to fixed night shifts are well documented,<sup>44</sup> although in the  
19 current study it was not possible to specifically identify the types of fixed shifts police completed  
20 (e.g., fixed night vs fixed day shifts). Despite this limitation, when we restricted the analysis to  
21 police only working fixed shifts, those reporting a greater frequency of night shifts had an  
22 increased risk of DP (Table S9, Table S10 and Table S11), which aligns with previous findings  
23 for fixed night work.<sup>43</sup> In addition to the different types of fixed shifts, there is also a diverse  
24 range of shift rotations in policing, which were grouped into one variable (i.e., rotating  
25 schedules) in our study. Specific shift rotations and types of fixed shifts may have varying effects  
26 on burnout, thus underspecifying these schedules in the current study may limit the interpretation  
27  
28  
29  
30  
31  
32  
33  
34  
35  
36  
37  
38  
39  
40  
41  
42  
43  
44  
45  
46  
47  
48  
49  
50  
51  
52  
53  
54  
55  
56  
57  
58  
59  
60

1  
2  
3 of our findings. Further research that utilises detailed objective shift work information will allow  
4  
5 for a more nuanced approach when it comes to examining interactions between different shift  
6  
7 schedules and burnout in police and other emergency services.  
8  
9

10  
11  
12 In addition to subjective shift information, a further limitation of this study was the use of self-  
13  
14 reported sleep characteristics. Although some questions used to record police officers' work and  
15  
16 sleep hours have been validated,<sup>20</sup> participants were required to report and recall this information  
17  
18 for the prior month. An additional limitation was the cross-sectional design. Future longitudinal  
19  
20 studies using objective work and sleep measures are needed to examine the causality within our  
21  
22 findings.  
23  
24  
25  
26  
27

28  
29 The results of this study among police contribute to a growing evidence-base in shift workers  
30  
31 that indicates how the number of long shifts and night shifts, mandatory overtime and short sleep  
32  
33 and sleepiness raise the risk of burnout. Importantly, we further demonstrate that irregular  
34  
35 schedules present a significant risk for burnout. These findings support future research in police  
36  
37 that trials reducing the rate of long shifts and night shifts per week in vulnerable officers, and  
38  
39 preventing irregular schedules where possible. Although shift work is unavoidable for industries  
40  
41 such as law enforcement, optimising work hours in relation to control over overtime, consistency  
42  
43 of schedules and reducing duration and frequency of night and long shifts should be explored as  
44  
45 a way to lower the high level of burnout among police, leading to improved health for personnel,  
46  
47 and enhanced performance for their department and communities whom they serve.  
48  
49  
50  
51  
52  
53  
54  
55  
56  
57  
58  
59  
60

**Contribution statement:**

SAP, APW, LKB, CSO, JPS, SQ, SWL, CAC and SMWR contributed to the design of the study. LKB, CSO, JPS, SQ, SWL, CAC and SMWR contributed to data collection. SAP, APW, LKB and SMWR conducted the data analysis. SAP, APW, LKB, CSO, JPS, SQ, SWL, CAC and SMWR contributed to the interpretation of the data, and the preparation and refinement of the final manuscript.

**Funding:**

This work was supported by grant 2004-FS-BX-0001 and grant 2010C-10002 from the National Institute of Justice, Office of Justice Programs, US Department of Justice; grants R01 OH008496 and R01 OH009403 from the Centers for Disease Control and Prevention; and grants from the ResMed Foundation. The funders had no role in the design and conduct of the study; collection, management, analysis, and interpretation of the data; preparation, review, or approval of the manuscript; and decision to submit the manuscript for publication. LKB, CAC, SWL, CSO and SQ were supported in part by R01OH010300.

**Data sharing statement:**

No additional data available.

**Ethics approval:**

This study was approved by the Ethics Committees of Partners HealthCare (2015P001357/BHW) and Monash University (2736).

**Competing interests statement:**

SAP, APW, JPS, SQ and CSO report no conflicts of interest. SMWR reports that he has served as a consultant through his institution to Philips Respironics, EdanSafe, National Transport Commission, Vanda Pharmaceuticals, Rail, Bus and Train Union, Tontine Group, Australian Workers' Union, Transport Accident Commission, Meda Consumer Healthcare, New South Wales Department of Education and Communities, and has through his institution received grants from Philips Respironics and Vanda Pharmaceuticals and reimbursements for conference travel expenses from Vanda Pharmaceuticals. SMWR currently serves as a consult to, and is a Program Leader for, the Cooperative Research Centre for Alertness, Safety and Productivity. SMWR institution has received equipment donations or other support from Compumedics, Philips Lighting, Optalert and Tyco Healthcare. SMWR is a former President of the Australasian Sleep Association and is a Director of the Sleep Health Foundation. SMWR has also served as an expert witness and/or consultant to shift work organizations. LKB reports research support from Cephalon, NFL charities, Sysco and San Francisco Bar Pilots. LKB has received consulting/lecture fees or served as a board member for Alertness Solution, Ceridian, Davis Joint Unified School Board, San Jose State University Foundation, Pugot Sound Pilots, Sygma and Torvec. SWL has no conflicts of interests directly related to the research or results reported in this paper. SWL holds a process patent for 'Systems and methods for determining and/or controlling sleep quality', which is assigned to the Brigham and Women's Hospital per Hospital policy. SWL has also served as a paid expert for legal proceedings related to light, sleep and health. SWL is a Program Leader for the CRC for Alertness, Safety and Productivity, Australia. CAC reports grants from Cephalon Inc., grants from Mary Ann & Stanley Snider via Combined Jewish Philanthropies, grants from National Football League Charities, grants from Optum,

1  
2  
3 grants from Philips Respironics, Inc., grants from ResMed Foundation, grants from San  
4  
5 Francisco Bar Pilots, grants from Schneider Inc., grants from Sysco, grants from Cephalon, Inc,  
6  
7 grants from Jazz Pharmaceuticals, grants from Takeda Pharmaceuticals, grants from Teva  
8  
9 Pharmaceuticals Industries, Ltd, grants from Sanofi-Aventis, Inc, grants from Sepracor, Inc,  
10  
11 grants from Wake Up Narcolepsy, personal fees from Bose Corporation, personal fees from  
12  
13 Boston Celtics, personal fees from Boston Red Sox, personal fees from Columbia River Bar  
14  
15 Pilots, personal fees from Institute of Digital Media and Child Development, personal fees from  
16  
17 Klarman Family Foundation, personal fees from Samsung Electronics, personal fees from Quest  
18  
19 Diagnostics, Inc, personal fees from Vanda Pharmaceuticals, personal fees from American  
20  
21 Academy of Sleep Medicine (AADSM), personal fees from CurtCo Media Labs LLC, personal  
22  
23 fees from Global Council on Brain Health/AARP, personal fees from Hawaii Sleep Health and  
24  
25 Wellness Foundation, personal fees from Harvard School of Public Health (HSPH), personal fees  
26  
27 from Maryland Sleep Society, personal fees from National Institute of Diabetes and Digestive  
28  
29 and Kidney Diseases (NIDDK), personal fees from National Sleep Foundation (NSF), personal  
30  
31 fees from New England College of Optometry, personal fees from University of Michigan,  
32  
33 personal fees from University of Washington, personal fees from Zurich Insurance Company,  
34  
35 Ltd, personal fees from Purdue Pharma, LP, personal fees from McGraw Hill, personal fees from  
36  
37 Houghton Mifflin Harcourt/Penguin, personal fees from Koninklijke Philips Electronics, N.V.,  
38  
39 personal fees from Cephalon, Inc, personal fees from State of Washington Board of Pilotage  
40  
41 Commissioners, personal fees from Ganesco Inc., holds an equity interest in Vanda  
42  
43 Pharmaceuticals, outside the submitted work. In addition, CAC holds a number of process  
44  
45 patents in the field of sleep/circadian rhythms (e.g., photic resetting of the human circadian  
46  
47 pacemaker).  
48  
49  
50  
51  
52  
53  
54  
55  
56  
57  
58  
59  
60

**REFERENCES**

1. Vila B. Impact of long work hours on police officers and the communities they serve. *Am J Ind Med* 2006;49:972-80. doi: 10.1002/ajim.20333
2. Fekedulegn D, Burchfiel CM, Charles LE, et al. Shift Work and Sleep Quality Among Urban Police Officers: The BCOPS Study. *J Occup Environ Med* 2016;58:e66-71. doi: 10.1097/jom.0000000000000620
3. Rajaratnam SM, Barger LK, Lockley SW, et al. Sleep disorders, health, and safety in police officers. *JAMA* 2011;306:2567-78.
4. Maslach CM, Jackson SE, Leiter MP. Maslach Burnout Inventory: Manual. 3rd Edition. Palo Alto, CA: Consulting Psychologists Press 1996.
5. McGreevy K. Selection practices and the police role. *Police Chief* 1974;41:41-3.
6. Crowe RP, Bower JK, Cash RE, et al. Association of Burnout with Workforce-Reducing Factors among EMS Professionals. *Prehosp Emerg Care* 2018;22:229-36. doi: 10.1080/10903127.2017.1356411
7. Summerfield D. Metropolitan Police blues: protracted sickness absence, ill health retirement, and the occupational psychiatrist. *BMJ* 2011;342:d2127. doi: 10.1136/bmj.d2127
8. Amendola K, Weisburd D, Hamilton E, et al. The Impact of Shift Length in Policing on Performance, Health, Quality of Life, Sleep, Fatigue, and Extra-Duty Employment: National Institute of Justice, Office of Justice Programs, US Department of Justice, 2011.
9. Barger L, Lockley S, Rajaratnam S, et al. Neurobehavioral, health, and safety consequences associated with shift work in safety-sensitive professions. *Curr Neurol Neurosci Rep* 2009;9:155-64. doi: 10.1007/s11910-009-0024-7



- 1  
2  
3 10. Cheng W-J, Cheng Y. Night shift and rotating shift in association with sleep problems,  
4  
5 burnout and minor mental disorder in male and female employees. *Occup Environ Med*  
6  
7 2017;74:483-88. doi: 10.1136/oemed-2016-103898  
8  
9
- 10 11. Yoo H, Franke WD. Sleep habits, mental health, and the metabolic syndrome in law  
11  
12 enforcement officers. *J Occup Environ Med* 2013;55:99-103. doi:  
13  
14 10.1097/JOM.0b013e31826e294c  
15  
16
- 17 12. Embriaco N, Azoulay E, Barrau K, et al. High level of burnout in intensivists: prevalence and  
18  
19 associated factors. *Am J Respir Crit Care Med* 2007;175:686-92. doi:  
20  
21 10.1164/rccm.200608-1184OC  
22  
23
- 24 13. Dall'Ora C, Griffiths P, Ball J, et al. Association of 12 h shifts and nurses' job satisfaction,  
25  
26 burnout and intention to leave: findings from a cross-sectional study of 12 European  
27  
28 countries. *BMJ Open* 2015;5:e008331. doi: 10.1136/bmjopen-2015-008331  
29  
30
- 31 14. Stimpfel AW, Sloane DM, Aiken LH. The longer the shifts for hospital nurses, the higher the  
32  
33 levels of burnout and patient dissatisfaction. *Health Aff* 2012;31:2501-9. doi:  
34  
35 10.1377/hlthaff.2011.1377  
36  
37
- 38 15. Boudreaux E, Mandry C, Brantley PJ. Emergency medical technician schedule modification:  
39  
40 impact and implications during short- and long-term follow-up. *Acad Emerg Med*  
41  
42 1998;5:128-33.  
43  
44
- 45 16. Fahrenkopf AM, Sectish TC, Barger LK, et al. Rates of medication errors among depressed  
46  
47 and burnt out residents: prospective cohort study. *BMJ* 2008;336:488-91. doi:  
48  
49 10.1136/bmj.39469.763218.BE  
50  
51
- 52 17. Burke RJ, Mikkelsen A. Burnout Among Norwegian Police Officers: Potential Antecedents  
53  
54 and Consequences. *Int J Stress Manag* 2006;13:64-83.  
55  
56  
57  
58  
59  
60

- 1  
2  
3 18. Martinussen M, Richardsen AM, Burke RJ. Job demands, job resources, and burnout among  
4 police officers. *J Crim Justice* 2007;35:239-49. doi: 10.1016/j.jcrimjus.2007.03.001  
5  
6  
7  
8 19. Metlaine A, Sauvet F, Gomez-Merino D, et al. Association between insomnia symptoms, job  
9 strain and burnout syndrome: a cross-sectional survey of 1300 financial workers. *BMJ*  
10 *Open* 2017;7:e012816. doi: 10.1136/bmjopen-2016-012816  
11  
12  
13  
14  
15 20. Lockley SW, Cronin JW, Evans EE, et al. Effect of reducing interns' weekly work hours on  
16 sleep and attentional failures. *N Engl J Med* 2004;351:1829-37. doi:  
17 10.1056/NEJMoa041404  
18  
19  
20  
21 21. Alterman T, Luckhaupt SE, Dahlhamer JM, et al. Prevalence rates of work organization  
22 characteristics among workers in the U.S.: data from the 2010 National Health Interview  
23 Survey. *Am J Ind Med*. 2013;56(6):647-659.  
24  
25  
26  
27  
28 22. Saha I, Mitra S. Does emotional intelligence upon interaction with perceived stress, moderate  
29 burnout among resident doctors? A study from West Bengal, India. *Int J Community*  
30 *Med Public Health* 2018;5:4382-87.  
31  
32  
33  
34  
35 23. Johns MW. Sensitivity and specificity of the multiple sleep latency test (MSLT), the  
36 maintenance of wakefulness test and the Epworth sleepiness scale: failure of the MSLT  
37 as a gold standard. *J Sleep Res* 2000;9:5-11.  
38  
39  
40  
41  
42 24. De la Fuente Solana EI, Aguayo Extremera R, Vargas Pecino C, et al. Prevalence and risk  
43 factors of burnout syndrome among Spanish police officers. *Psicothema* 2013;25:488-93.  
44  
45  
46  
47  
48  
49 25. Kou K-Y, Wu H-H. Assessing Emotional Exhaustion of Police Officers in Taiwan by  
50  
51  
52  
53  
54  
55  
56  
57  
58  
59  
60

- 1  
2  
3 26. Wolf MR, Rosenstock JB. Inadequate Sleep and Exercise Associated with Burnout and  
4  
5 Depression Among Medical Students. *Acad Psychiatry* 2017;41:174-79. doi:  
6  
7 10.1007/s40596-016-0526-y  
8  
9  
10 27. Houdmont J, Randall R. Working hours and common mental disorders in English police  
11  
12 officers. *Occup Med* 2016;66:713-18. doi: 10.1093/occmed/kqw166  
13  
14 28. Ranganathan P, Pramesh CS, Aggarwal R. Common pitfalls in statistical analysis: Logistic  
15  
16 regression. *Perspect Clin Res.* 2017;8:148-51.  
17  
18 29. Bureau of Labor Statistics. Current Population Survey (CPS): annual averages—household  
19  
20 data, 2007.  
21  
22  
23 30. Flegal KM, Kruszon-Moran D, Carroll MD, et al. Trends in Obesity Among Adults in the  
24  
25 United States, 2005 to 2014. *JAMA* 2016;315:2284-91. doi: 10.1001/jama.2016.6458  
26  
27  
28 31. Shanafelt TD, Boone S, Tan L, et al. Burnout and satisfaction with work-life balance among  
29  
30 US physicians relative to the general US population. *Arch Intern Med* 2012;172:1377-85.  
31  
32 doi: 10.1001/archinternmed.2012.3199  
33  
34 32. Beckers DG, van der Linden D, Smulders PG, et al. Voluntary or involuntary? Control over  
35  
36 overtime and rewards for overtime in relation to fatigue and work satisfaction. *Work*  
37  
38 *Stress* 2008;22:33-50.  
39  
40  
41 33. Wisetborisut A, Angkurawaranon C, Jiraporncharoen W, et al. Shift work and burnout  
42  
43 among health care workers. *Occup Med* 2014;64:279-86. doi: 10.1093/occmed/kqu009  
44  
45  
46 34. Bedrosian TA, Nelson RJ. Timing of light exposure affects mood and brain circuits. *Transl*  
47  
48 *Psychiatry* 2017;7:e1017. doi: 10.1038/tp.2016.262  
49  
50  
51 35. Grunfeld E, Whelan TJ, Zitzelsberger L, et al. Cancer care workers in Ontario: prevalence of  
52  
53 burnout, job stress and job satisfaction. *CMAJ* 2000;163:166-69.  
54  
55  
56  
57  
58  
59  
60

- 1  
2  
3 36. Schaufeli W, Enzmann D. The burnout companion to study and practice: A critical analysis.  
4  
5 Philadelphia, PA. CRC Press, Taylor & Francis Group 1998.  
6  
7  
8 37. Ma CC, Andrew ME, Fekedulegn D, et al. Shift Work and Occupational Stress in Police  
9  
10 Officers. *Saf Health Work* 2015;6:25-29. doi: 10.1016/j.shaw.2014.10.001  
11  
12 38. Arendt J. Shift work: coping with the biological clock. *Occup Med* 2010;60:10-20. doi:  
13  
14 10.1093/occmed/kqp162  
15  
16 39. Jamal M. Burnout, stress and health of employees on non-standard work schedules: a study  
17  
18 of Canadian workers. *Stress Health* 2004;20:113-19. doi: 10.1002/smi.1012  
19  
20 40. Lemola S, Ledermann T, Friedman EM. Variability of sleep duration is related to subjective  
21  
22 sleep quality and subjective well-being: an actigraphy study. *PloS one* 2013;8:e71292.  
23  
24 41. Sallinen M, Härmä M, Mutanen P, et al. Sleep–wake rhythm in an irregular shift system. *J*  
25  
26 *Sleep Res* 2003;12:103-12.  
27  
28 42. Shamali M, Shahriari M, Babaii A, et al. Comparative Study of Job Burnout Among Critical  
29  
30 Care Nurses With Fixed and Rotating Shift Schedules. *Nurs Midwifery Stud*  
31  
32 2015;4:e27766. doi: 10.17795/nmsjournal27766  
33  
34 43. Shahriari M, Shamali M, Yazdannik A. The relationship between fixed and rotating shifts  
35  
36 with job burnout in nurses working in critical care areas. *Iran J Nurs Midwifery Res*  
37  
38 2014;19:360-65.  
39  
40 44. Folkard S. Do permanent night workers show circadian adjustment? A review based on the  
41  
42 endogenous melatonin rhythm. *Chronobiol Int* 2008;25:215-24.  
43  
44  
45  
46  
47  
48  
49  
50  
51  
52  
53  
54  
55  
56  
57  
58  
59  
60

## Supplement

**Table S1.** Multicollinearity statistics for all shift work and sleep predictor variables included in the multiple logistic regression analysis

| Predictor variable                    | Multicollinearity Statistics |                           |
|---------------------------------------|------------------------------|---------------------------|
|                                       | Tolerance                    | Variance Inflation Factor |
| <b><i>Emotional Exhaustion</i></b>    |                              |                           |
| Night shift frequency                 | 0.932                        | 1.073                     |
| Long work shifts                      | 0.884                        | 1.131                     |
| Long work weeks                       | 0.860                        | 1.163                     |
| Mandatory overtime                    | 0.525                        | 1.904                     |
| Voluntary overtime                    | 0.455                        | 2.197                     |
| Any overtime                          | 0.352                        | 2.840                     |
| Shift rotation                        | 0.977                        | 1.023                     |
| Sleep duration                        | 0.947                        | 1.056                     |
| Sleepiness                            | 0.982                        | 1.019                     |
| <b><i>Depersonalisation</i></b>       |                              |                           |
| Night shift frequency                 | 0.936                        | 1.068                     |
| Long work shifts                      | 0.888                        | 1.127                     |
| Long work weeks                       | 0.859                        | 1.164                     |
| Mandatory overtime                    | 0.528                        | 1.893                     |
| Voluntary overtime                    | 0.458                        | 2.181                     |
| Any overtime                          | 0.354                        | 2.821                     |
| Shift rotation                        | 0.978                        | 1.023                     |
| Sleep duration                        | 0.951                        | 1.051                     |
| Sleepiness                            | 0.984                        | 1.017                     |
| <b><i>Personal Accomplishment</i></b> |                              |                           |
| Night shift frequency                 | 0.940                        | 1.064                     |
| Long work shifts                      | 0.885                        | 1.130                     |
| Long work weeks                       | 0.862                        | 1.161                     |
| Mandatory overtime                    | 0.532                        | 1.881                     |
| Voluntary overtime                    | 0.462                        | 2.165                     |
| Any overtime                          | 0.357                        | 2.798                     |
| Shift rotation                        | 0.977                        | 1.023                     |
| Sleep duration                        | 0.954                        | 1.049                     |
| Sleepiness                            | 0.986                        | 1.014                     |
| <b><i>Burnout (High EE+DP)</i></b>    |                              |                           |
| Night shift frequency                 | 0.934                        | 1.071                     |
| Long work shifts                      | 0.883                        | 1.133                     |
| Long work weeks                       | 0.858                        | 1.165                     |
| Mandatory overtime                    | 0.527                        | 1.898                     |
| Voluntary overtime                    | 0.455                        | 2.198                     |
| Any overtime                          | 0.350                        | 2.854                     |
| Shift rotation                        | 0.979                        | 1.022                     |
| Sleep duration                        | 0.950                        | 1.053                     |
| Sleepiness                            | 0.983                        | 1.018                     |

EE, emotional exhaustion; DP, depersonalization.

**Table S2.** Pearson correlation coefficient between shift work and sleep predictor variables

|                              | <b>Long work shifts</b> | <b>Long work weeks</b> | <b>Mandatory overtime</b> | <b>Voluntary overtime</b> | <b>Any overtime</b> | <b>Shift rotation</b> | <b>Sleep Duration</b> | <b>Sleepiness</b> |
|------------------------------|-------------------------|------------------------|---------------------------|---------------------------|---------------------|-----------------------|-----------------------|-------------------|
| <b>Night shift frequency</b> | 0.076                   | 0.053                  | 0.155                     | 0.034                     | 0.132               | 0.026                 | 0.146                 | 0.099             |
| <b>Long work shifts</b>      |                         | 0.324                  | 0.094                     | 0.106                     | 0.115               | -0.027                | 0.057                 | 0.031             |
| <b>Long work weeks</b>       |                         |                        | 0.068                     | 0.244                     | 0.195               | -0.051                | 0.056                 | 0.008             |
| <b>Mandatory overtime</b>    |                         |                        |                           | -0.033                    | 0.539               | 0.102                 | 0.101                 | 0.059             |
| <b>Voluntary overtime</b>    |                         |                        |                           |                           | 0.609               | -0.012                | 0.013                 | 0.006             |
| <b>Any overtime</b>          |                         |                        |                           |                           |                     | 0.063                 | 0.071                 | 0.021             |
| <b>Shift rotation</b>        |                         |                        |                           |                           |                     |                       | 0.105                 | 0.011             |
| <b>Sleep duration</b>        |                         |                        |                           |                           |                     |                       |                       | 0.074             |

**Table S3.** High burnout outcomes associated with working at least 1 long shift in the past 4 weeks (n=3140)

| Worked >0 Long Shifts<br>in Past 4 Weeks, <i>n</i> <sup>†,‡</sup> | Positive result in police with high burnout,<br>No./No. total (%) |                    | Unadjusted         |                | Adjusted <sup>¶</sup> |                |
|-------------------------------------------------------------------|-------------------------------------------------------------------|--------------------|--------------------|----------------|-----------------------|----------------|
|                                                                   |                                                                   |                    | OR (95% CI)        | <i>P</i> Value | OR (95% CI)           | <i>P</i> Value |
|                                                                   | High EE                                                           | Low-moderate EE    |                    |                |                       |                |
| No                                                                | 69/575 (12.0)                                                     | 296/1719 (17.2)    |                    |                |                       |                |
| Yes                                                               | 506/575 (88.0)                                                    | 1423/1719 (82.8)   | 1.53 (1.52 - 2.02) | 0.003          | 1.54 (1.51 - 2.06)    | 0.004          |
| <i>n</i>                                                          | 2294                                                              |                    |                    |                |                       |                |
|                                                                   | High DP                                                           | Low-moderate DP    |                    |                |                       |                |
| No                                                                | 151/1027 (14.7)                                                   | 226/1316 (17.2)    |                    |                |                       |                |
| Yes                                                               | 876/1027 (85.3)                                                   | 1090/1316 (82.8)   | 1.20 (0.96 - 1.51) | 0.107          | 1.12 (0.88 - 1.41)    | 0.365          |
| <i>n</i>                                                          | 2343                                                              |                    |                    |                |                       |                |
|                                                                   | Low PA                                                            | Moderate-high PA   |                    |                |                       |                |
| No                                                                | 167/962 (17.4)                                                    | 201/1314 (15.3)    |                    |                |                       |                |
| Yes                                                               | 795/962 (82.6)                                                    | 1113/1314 (84.7)   | 0.86 (0.69 - 1.08) | 0.187          | 0.85 (0.67 - 1.08)    | 0.187          |
| <i>n</i>                                                          | 2276                                                              |                    |                    |                |                       |                |
|                                                                   | Overall burnout                                                   | No overall burnout |                    |                |                       |                |
| No                                                                | 51/426 (12.0)                                                     | 338/1967 (17.2)    |                    |                |                       |                |
| Yes                                                               | 375/426 (88.0)                                                    | 1629/1967 (82.8)   | 1.53 (1.11 - 2.09) | 0.009          | 1.43 (1.04 - 1.98)    | 0.029          |
| <i>n</i>                                                          | 2393                                                              |                    |                    |                |                       |                |

EE, emotional exhaustion; DP, depersonalisation; PA, personal accomplishment; OR, odds ratio; CI, confidence interval; <sup>†</sup>The *n* presented represents the sample for each unadjusted analysis. The *n* for the adjusted analyses are in Supplement 1, Table S4; <sup>‡</sup>Some participants did not provide sufficient information from which to determine their long shifts. The *n* presented are from those who answered sufficiently; <sup>¶</sup>Adjusted for age, BMI, gender, marital status, hypertension, cigarette use, caffeine use, alcohol use, second job, primary activity, years as police officers, exercise frequency, and seniority. Variables included in each model are in Supplement 1, Table S4 and model fit is reported in Supplement 1, Table S5.

**Table S4.** Variables included in models used to examine associations between sleep and sleepiness, shift schedules and burnout outcomes in police regularly working long shifts ( $\geq 2$  per week), more than 1 long shift in the past 4 weeks

| Shift work and sleep characteristics, <i>n</i> <sup>‡</sup> | Emotional Exhaustion             | Depersonalisation                                                                       | Personal Accomplishment                                        | Burnout (High EE+DP)     |
|-------------------------------------------------------------|----------------------------------|-----------------------------------------------------------------------------------------|----------------------------------------------------------------|--------------------------|
| (Extended shift sample)<br>Sleep duration                   | Gender, seniority                | Age, blood pressure, primary activity, seniority                                        | Second job                                                     | Age, seniority           |
| <i>n</i>                                                    | 813                              | 782                                                                                     | 691                                                            | 842                      |
| (Extended shift sample)<br>Sleepiness                       | Gender, seniority                | Age, exercise                                                                           | Cigarette use, second job                                      | Seniority                |
| <i>n</i>                                                    | 856                              | 904                                                                                     | 713                                                            | 887                      |
| >0 Long shifts in past 4 weeks                              | Gender, Cigarette use, seniority | Age, cigarette use, caffeine use, primary activity, years in law enforcement, seniority | Age, BMI <sup>†</sup> , blood pressure, caffeine use, exercise | Cigarette use, seniority |
| <i>n</i>                                                    | 2230                             | 2250                                                                                    | 2134                                                           | 2330                     |

EE, emotional exhaustion; DP, depersonalization; OT, overtime; BMI, body mass index; <sup>†</sup>BMI was a continuous variable; <sup>‡</sup>The *n* presented represents the sample for the adjusted analyses.



**Table S5.** Model fit assessment for models used to examine associations between sleep, sleepiness, shift schedules and burnout outcomes in police regularly working long shifts ( $\geq 2$  per week) and more than 1 long shift in the past 4 weeks

| Predictor variable               | Block 1 model vs Baseline model |                           |          |         | Block 2 model vs Block 1 model |          |         | Block 2 model vs Baseline model |         |
|----------------------------------|---------------------------------|---------------------------|----------|---------|--------------------------------|----------|---------|---------------------------------|---------|
|                                  | Baseline -2 log-likelihood      | Block 1 -2 log-likelihood | $\chi^2$ | P Value | Block 2 -2 log-likelihood      | $\chi^2$ | P Value | $\chi^2$                        | P Value |
| Emotional Exhaustion             |                                 |                           |          |         |                                |          |         |                                 |         |
| Sleep Duration (Table S8)        | 955.246                         | 926.646                   | 28.600   | <0.001  | 908.051                        | 18.594   | <0.001  | 47.194                          | <0.001  |
| Sleepiness (Table S8)            | 992.275                         | 964.570                   | 27.705   | <0.001  | 947.997                        | 16.573   | <0.001  | 44.278                          | <0.001  |
| At least 1 long shift (Table S3) | 2526.519                        | 2458.661                  | 67.858   | <0.001  | 2449.703                       | 8.959    | 0.003   | 76.816                          | <0.001  |
| Depersonalisation                |                                 |                           |          |         |                                |          |         |                                 |         |
| Sleep Duration (Table S8)        | 1074.158                        | 1033.530                  | 40.628   | <0.001  | 1027.265                       | 6.265    | 0.012   | 46.894                          | <0.001  |
| Sleepiness (Table S8)            | 1232.672                        | 1203.538                  | 29.134   | <0.001  | 1183.564                       | 19.974   | <0.001  | 49.108                          | <0.001  |
| At least 1 long shift (Table S3) | 3094.782                        | 2989.169                  | 105.613  | <0.001  | 2988.346                       | 0.824    | 0.364   | 106.437                         | <0.001  |
| Personal Accomplishment          |                                 |                           |          |         |                                |          |         |                                 |         |
| Sleep Duration (Table S8)        | 915.170                         | 910.236                   | 4.934    | 0.026   | 910.222                        | 0.014    | 0.907   | 4.948                           | 0.084   |
| Sleepiness (Table S8)            | 957.902                         | 948.042                   | 9.860    | 0.007   | 947.864                        | 0.178    | 0.673   | 10.038                          | 0.018   |
| At least 1 long shift (Table S3) | 2905.861                        | 2845.281                  | 60.580   | <0.001  | 2843.543                       | 1.738    | 0.187   | 62.318                          | <0.001  |
| Overall Burnout                  |                                 |                           |          |         |                                |          |         |                                 |         |
| Sleep Duration (Table S8)        | 838.781                         | 814.448                   | 24.334   | 0.001   | 801.083                        | 13.365   | <0.001  | 37.698                          | <0.001  |
| Sleepiness (Table S8)            | 872.535                         | 855.789                   | 16.746   | 0.010   | 840.539                        | 15.250   | <0.001  | 31.996                          | <0.001  |
| At least 1 long shift (Table S3) | 2204.559                        | 2163.002                  | 41.557   | <0.001  | 2157.926                       | 5.076    | 0.024   | 46.633                          | <0.001  |

**Table S6.** Variables included in the models used to examine associations between shift characteristics, shift schedules, sleep, and burnout outcomes

| Shift work and sleep characteristics, <i>n</i> <sup>‡</sup> | Emotional Exhaustion                       | Depersonalisation                                                                       | Personal Accomplishment                                            | Burnout (High EE+DP)                                    |
|-------------------------------------------------------------|--------------------------------------------|-----------------------------------------------------------------------------------------|--------------------------------------------------------------------|---------------------------------------------------------|
| <b>Night shift frequency</b>                                | Gender, cigarette use, seniority           | Age, cigarette use, second job, primary activity, years in law enforcement, seniority   | Age, BMI <sup>†</sup> , cigarette use, caffeine use, exercise      | Age, cigarette use, seniority                           |
| <i>n</i>                                                    | 2882                                       | 2440                                                                                    | 2881                                                               | 3015                                                    |
| <b>Long work shifts</b>                                     | Gender, cigarette use, exercise, seniority | Age, cigarette use, caffeine use, primary activity, years in law enforcement, seniority | Age, caffeine use, exercise                                        | Gender, cigarette use, seniority                        |
| <i>n</i>                                                    | 2220                                       | 2250                                                                                    | 2134                                                               | 2328                                                    |
| <b>Long work weeks</b>                                      | Gender, cigarette use, seniority           | Age, cigarette use, second job, primary activity, seniority                             | Age, BMI <sup>†</sup> , cigarette use, exercise                    | Age, cigarette use, seniority                           |
| <i>n</i>                                                    | 2862                                       | 2479                                                                                    | 2873                                                               | 2994                                                    |
| <b>Shift schedule</b>                                       | Gender, cigarette use, seniority           | Age, cigarette use, second job, primary activity, years in law enforcement, seniority   | Age, BMI <sup>†</sup> , cigarette use, caffeine use, exercise      | Age, cigarette use, years in law enforcement, seniority |
| <i>n</i>                                                    | 2894                                       | 2451                                                                                    | 2898                                                               | 2992                                                    |
| <b>Mandatory OT</b>                                         | Gender, cigarette use, seniority           | Age, cigarette use, second job, primary activity, years in law enforcement, seniority   | Age, BMI <sup>†</sup> , cigarette use, primary activity, exercise  | Age, cigarette use, seniority                           |
| <i>n</i>                                                    | 2512                                       | 2353                                                                                    | 2521                                                               | 2622                                                    |
| <b>Voluntary OT</b>                                         | Gender, cigarette use, seniority           | Age, cigarette use, primary activity, seniority                                         | Age, BMI <sup>†</sup> , cigarette use, primary activity, seniority | Age, cigarette use, seniority                           |
| <i>n</i>                                                    | 2531                                       | 2587                                                                                    | 2536                                                               | 2639                                                    |
| <b>Any OT</b>                                               | Gender, cigarette use, seniority           | Age, cigarette use, primary activity, years in law enforcement, seniority               | Age, cigarette use, exercise                                       | Age, cigarette use, seniority                           |
| <i>n</i>                                                    | 2368                                       | 2407                                                                                    | 2378                                                               | 2470                                                    |
| <b>Sleepiness</b>                                           | Gender, cigarette use, exercise, seniority | Age, cigarette use, second job, primary activity, seniority                             | Age, BMI <sup>†</sup> , cigarette use, exercise                    | Age, cigarette use, seniority                           |
| <i>n</i>                                                    | 2772                                       | 2375                                                                                    | 2667                                                               | 2921                                                    |
| <b>Sleep duration</b>                                       | Gender, cigarette use, seniority           | Age, cigarette use, caffeine use, primary activity, exercise, seniority                 | Age, BMI <sup>†</sup> , cigarette use, primary activity, exercise  | Age, primary activity, seniority                        |
| <i>n</i>                                                    | 2554                                       | 2595                                                                                    | 2537                                                               | 2663                                                    |

EE, emotional exhaustion; DP, depersonalization; OT, overtime; BMI, body mass index;

<sup>†</sup>BMI was a continuous variable; <sup>‡</sup>The *n* presented represents the sample for the adjusted analyses.

**Table S7.** Model fit assessment for models used to examine associations between shift work characteristics, shift schedules, sleep and burnout outcomes

| Predictor variable                           | Block 1 model vs Baseline model |                           |          |         | Block 2 model vs Block 1 model |          |         | Block 2 model vs Baseline model |         |
|----------------------------------------------|---------------------------------|---------------------------|----------|---------|--------------------------------|----------|---------|---------------------------------|---------|
|                                              | Baseline -2 log-likelihood      | Block 1 -2 log-likelihood | $\chi^2$ | P Value | Block 2 -2 log-likelihood      | $\chi^2$ | P Value | $\chi^2$                        | P Value |
| <b>Emotional Exhaustion</b>                  |                                 |                           |          |         |                                |          |         |                                 |         |
| Night shift frequency                        | 3242.398                        | 3177.483                  | 64.915   | <0.001  | 3176.031                       | 1.451    | 0.694   | 66.367                          | <0.001  |
| Long work shifts per week ( $\geq 11$ hours) | 2518.501                        | 2437.941                  | 80.560   | <0.001  | 2424.368                       | 13.573   | 0.004   | 94.133                          | <0.001  |
| Long work weeks                              | 3224.288                        | 3163.277                  | 61.011   | <0.001  | 3161.114                       | 2.162    | 0.141   | 63.173                          | <0.001  |
| Mandatory overtime                           | 2855.519                        | 2803.785                  | 51.734   | <0.001  | 2792.186                       | 11.599   | 0.001   | 63.333                          | <0.001  |
| Voluntary overtime                           | 2851.474                        | 2803.191                  | 48.282   | <0.001  | 2802.681                       | 0.510    | 0.475   | 48.792                          | <0.001  |
| Any overtime (Mandatory or voluntary)        | 2695.674                        | 2650.557                  | 45.117   | <0.001  | 2647.720                       | 2.836    | 0.092   | 47.953                          | <0.001  |
| Shift schedule                               | 3264.646                        | 3200.499                  | 64.147   | <0.001  | 3176.911                       | 23.588   | <0.001  | 87.735                          | <0.001  |
| Sleep duration                               | 2884.430                        | 2829.733                  | 54.696   | <0.001  | 2805.322                       | 24.411   | <0.001  | 79.108                          | <0.001  |
| Sleepiness                                   | 3124.160                        | 3046.472                  | 77.688   | <0.001  | 3009.107                       | 37.365   | <0.001  | 115.053                         | <0.001  |
| <b>Depersonalisation</b>                     |                                 |                           |          |         |                                |          |         |                                 |         |
| Night shift frequency                        | 3360.466                        | 3252.568                  | 107.898  | <0.001  | 3245.833                       | 6.734    | 0.081   | 114.632                         | <0.001  |
| Long work shifts per week ( $\geq 11$ hours) | 3094.782                        | 2989.169                  | 105.613  | <0.001  | 2984.924                       | 4.245    | 0.236   | 109.858                         | <0.001  |
| Long work weeks                              | 3415.808                        | 3316.551                  | 99.258   | <0.001  | 3316.472                       | 0.078    | 0.779   | 99.336                          | <0.001  |
| Mandatory overtime                           | 3243.362                        | 3134.813                  | 108.549  | <0.001  | 3128.779                       | 6.034    | 0.014   | 114.583                         | <0.001  |
| Voluntary overtime                           | 3568.120                        | 3475.359                  | 92.761   | <0.001  | 3470.640                       | 4.719    | 0.030   | 97.480                          | <0.001  |
| Any overtime (Mandatory or voluntary)        | 3322.268                        | 3216.873                  | 105.395  | <0.001  | 3202.430                       | 14.443   | <0.001  | 119.838                         | <0.001  |
| Shift schedule                               | 3376.754                        | 3267.995                  | 108.759  | <0.001  | 3263.216                       | 4.779    | 0.189   | 113.538                         | <0.001  |
| Sleep duration                               | 3579.600                        | 3464.638                  | 114.963  | <0.001  | 3462.581                       | 2.056    | 0.152   | 117.019                         | <0.001  |
| Sleepiness                                   | 3273.321                        | 3180.016                  | 93.305   | <0.001  | 3163.182                       | 16.833   | <0.001  | 110.138                         | <0.001  |
| <b>Personal Accomplishment</b>               |                                 |                           |          |         |                                |          |         |                                 |         |
| Night shift frequency                        | 3933.344                        | 3862.300                  | 71.044   | <0.001  | 3857.460                       | 4.841    | 0.184   | 75.885                          | <0.001  |
| Long work shifts per week ( $\geq 11$ hours) | 2905.861                        | 2845.281                  | 60.580   | <0.001  | 2841.977                       | 3.304    | 0.347   | 63.884                          | <0.001  |
| Long work weeks                              | 3922.667                        | 3854.019                  | 68.648   | <0.001  | 3848.346                       | 5.674    | 0.017   | 74.322                          | <0.001  |
| Mandatory overtime                           | 3441.816                        | 3381.423                  | 60.393   | <0.001  | 3381.416                       | 0.007    | 0.935   | 60.400                          | <0.001  |
| Voluntary overtime                           | 3459.090                        | 3392.836                  | 66.254   | <0.001  | 3390.823                       | 2.012    | 0.156   | 68.266                          | <0.001  |
| Any overtime (Mandatory or voluntary)        | 3246.670                        | 3183.680                  | 62.990   | <0.001  | 3183.536                       | 0.144    | 0.704   | 63.134                          | <0.001  |
| Shift schedule                               | 3959.849                        | 3895.533                  | 64.316   | <0.001  | 3881.181                       | 14.352   | 0.002   | 78.668                          | <0.001  |
| Sleep duration                               | 3443.452                        | 3390.407                  | 53.045   | <0.001  | 3384.026                       | 6.380    | 0.012   | 59.425                          | <0.001  |
| Sleepiness                                   | 3643.751                        | 3580.752                  | 62.999   | <0.001  | 3577.116                       | 3.505    | 0.061   | 66.635                          | <0.001  |
| <b>Overall Burnout</b>                       |                                 |                           |          |         |                                |          |         |                                 |         |
| Night shift frequency                        | 2828.199                        | 2767.204                  | 60.995   | <0.001  | 2764.317                       | 2.888    | 0.409   | 63.883                          | <0.001  |
| Long work shifts per week ( $\geq 11$ hours) | 2203.759                        | 2156.970                  | 46.789   | <0.001  | 2147.794                       | 9.176    | 0.027   | 55.965                          | <0.001  |
| Long work weeks                              | 2825.977                        | 2768.128                  | 57.849   | <0.001  | 2766.499                       | 1.629    | 0.202   | 59.478                          | <0.001  |
| Mandatory overtime                           | 2522.921                        | 2471.633                  | 51.289   | <0.001  | 2461.084                       | 10.549   | 0.001   | 61.837                          | <0.001  |
| Voluntary overtime                           | 2509.058                        | 2462.021                  | 47.038   | <0.001  | 2462.008                       | 0.013    | 0.910   | 47.051                          | <0.001  |
| Any overtime (Mandatory or voluntary)        | 2386.497                        | 2342.340                  | 44.158   | <0.001  | 2336.122                       | 6.218    | 0.013   | 50.375                          | <0.001  |
| Shift schedule                               | 2825.181                        | 2759.886                  | 65.295   | <0.001  | 2736.336                       | 23.549   | <0.000  | 88.845                          | <0.001  |
| Sleep duration                               | 2527.726                        | 2473.363                  | 54.363   | <0.001  | 2458.897                       | 14.466   | <0.001  | 68.829                          | <0.001  |
| Sleepiness                                   | 2748.475                        | 2693.100                  | 55.375   | <0.001  | 266.405                        | 26.694   | <0.001  | 82.070                          | <0.001  |

**Table S8.** High burnout outcomes associated with sleep and sleepiness in police regularly working long work shifts ( $\geq 2$  long work shifts per week; n=978)

| Sleep characteristic, n <sup>†,‡</sup> | Positive result in police with high burnout, No./No. total (%) |                    | Unadjusted         | P Value | Adjusted <sup>¶</sup> | P Value |
|----------------------------------------|----------------------------------------------------------------|--------------------|--------------------|---------|-----------------------|---------|
|                                        |                                                                |                    | OR (95% CI)        |         | OR (95% CI)           |         |
|                                        | High EE                                                        | Low-moderate EE    |                    |         |                       |         |
| Sleep duration                         |                                                                |                    |                    |         |                       |         |
| $\geq 6$ hours per night               | 105/228 (46.1)                                                 | 398/617 (64.5)     | 2.13 (1.56 - 2.90) | <0.001  | 2.02 (1.46 - 2.78)    | <0.001  |
| <6 hours per night                     | 123/228 (53.9)                                                 | 219/617 (35.5)     |                    |         |                       |         |
| n                                      | 845                                                            |                    |                    |         |                       |         |
| Sleepiness                             |                                                                |                    |                    |         |                       |         |
| <11 ESS                                | 139/234 (59.4)                                                 | 502/664 (75.6)     | 2.12 (1.55 - 2.90) | <0.001  | 1.99 (1.43 - 2.77)    | <0.001  |
| $\geq 11$ ESS                          | 95/234 (40.6)                                                  | 162/664 (24.4)     |                    |         |                       |         |
| n                                      | 898                                                            |                    |                    |         |                       |         |
|                                        | High DP                                                        | Low-moderate DP    |                    |         |                       |         |
| Sleep duration                         |                                                                |                    |                    |         |                       |         |
| $\geq 6$ hours per night               | 198/371 (53.4)                                                 | 317/486 (65.2)     | 1.64 (1.24 - 2.16) | <0.001  | 1.46 (1.09 - 1.97)    | 0.012   |
| <6 hours per night                     | 169/371 (46.6)                                                 | 173/487 (34.8)     |                    |         |                       |         |
| n                                      | 857                                                            |                    |                    |         |                       |         |
| Sleepiness                             |                                                                |                    |                    |         |                       |         |
| <11 ESS                                | 244/384 (63.5)                                                 | 403/523 (77.1)     | 1.93 (1.44 - 2.58) | <0.001  | 1.97 (1.46 - 2.66)    | <0.001  |
| $\geq 11$ ESS                          | 140/384 (36.5)                                                 | 120/523 (22.9)     |                    |         |                       |         |
| n                                      | 907                                                            |                    |                    |         |                       |         |
|                                        | Low PA                                                         | Moderate-high PA   |                    |         |                       |         |
| Sleep duration                         |                                                                |                    |                    |         |                       |         |
| $\geq 6$ hours per night               | 188/317 (59.3)                                                 | 311/516 (60.3)     | 1.04 (0.78 - 1.38) | 0.783   | 1.02 (0.74 - 1.40)    | 0.907   |
| <6 hours per night                     | 129/317 (40.7)                                                 | 205/516 (39.7)     |                    |         |                       |         |
| n                                      | 833                                                            |                    |                    |         |                       |         |
| Sleepiness                             |                                                                |                    |                    |         |                       |         |
| <11 ESS                                | 247/353 (70.)                                                  | 379/527 (71.9)     | 1.01 (0.82 - 1.48) | 0.533   | 1.08 (0.77 - 1.50)    | 0.673   |
| $\geq 11$ ESS                          | 106/353 (30.0)                                                 | 148/527 (28.1)     |                    |         |                       |         |
| n                                      | 880                                                            |                    |                    |         |                       |         |
|                                        | Overall burnout                                                | No overall burnout |                    |         |                       |         |
| Sleep duration                         |                                                                |                    |                    |         |                       |         |
| $\geq 6$ hours per night               | 77/169 (45.6)                                                  | 444/706 (62.9)     | 2.03 (1.44 - 2.84) | <0.001  | 1.92 (1.35 - 2.72)    | <0.001  |
| <6 hours per night                     | 92/169 (54.5)                                                  | 262/706 (37.1)     |                    |         |                       |         |
| n                                      | 875                                                            |                    |                    |         |                       |         |
| Sleepiness                             |                                                                |                    |                    |         |                       |         |
| <11 ESS                                | 101/175 (57.7)                                                 | 560/754 (74.3)     | 2.12 (1.50 - 2.98) | <0.001  | 2.03 (1.43 - 2.89)    | <0.001  |
| $\geq 11$ ESS                          | 74/175 (42.3)                                                  | 194/754 (25.7)     |                    |         |                       |         |
| n                                      | 929                                                            |                    |                    |         |                       |         |

EE, emotional exhaustion; DP, depersonalisation; PA, personal accomplishment; ESS, Epworth Sleepiness Scale; OR, odds ratio; CI, confidence interval; <sup>†</sup>The n presented represents the sample for each unadjusted analysis. The n for the adjusted analyses are in Supplement 1, Table S4; <sup>‡</sup>Some participants did not provide sufficient information from which to determine their sleep duration and sleepiness. The n presented are from those who answered sufficiently; <sup>¶</sup>Adjusted for age, BMI, gender, marital status, hypertension, cigarette use, caffeine use, alcohol use, second job, primary activity, years as police officers, exercise frequency, and seniority. Variables included in each model are in Supplement 1, Table S4, and model fit is reported in Supplement 1, Table S5.

**Table S9.** High burnout outcomes associated with night shift frequency in police working fixed shifts (n=1822)

| Night shift frequency, <i>n</i> <sup>†, ‡</sup> | Positive result in police with high burnout,<br>No./No. total (%) |                    | Unadjusted         |                | Adjusted <sup>¶</sup> |                |
|-------------------------------------------------|-------------------------------------------------------------------|--------------------|--------------------|----------------|-----------------------|----------------|
|                                                 |                                                                   |                    | OR (95% CI)        | <i>P</i> Value | OR (95% CI)           | <i>P</i> Value |
|                                                 | High EE                                                           | Low-moderate EE    |                    |                |                       |                |
| Never/nearly never                              | 170/378 (45.0)                                                    | 614/1357 (45.2)    |                    |                |                       |                |
| 1-4 per month                                   | 63/378 (16.7)                                                     | 245/1357 (18.1)    | 0.93 (0.67 - 1.29) | 0.656          | 0.90 (0.65 - 1.26)    | 0.550          |
| 1-4 per week                                    | 44/378 (11.6)                                                     | 180/1357 (13.3)    | 0.88 (0.61 - 1.28) | 0.510          | 0.92 (0.63 - 1.35)    | 0.666          |
| Nearly every day                                | 101/378 (26.7)                                                    | 318/1357 (23.4)    | 1.15 (0.87 - 1.52) | 0.338          | 1.17 (0.87 - 1.57)    | 0.290          |
| <i>n</i>                                        | 1735                                                              |                    |                    |                |                       |                |
|                                                 | High DP                                                           | Low-moderate DP    |                    |                |                       |                |
| Never/nearly never                              | 279/733 (38.1)                                                    | 518/1033 (50.1)    |                    |                |                       |                |
| 1-4 per month                                   | 138/733 (18.8)                                                    | 176/1033 (17.0)    | 1.46 (1.12 - 1.90) | 0.006          | 1.33 (1.00 - 1.78)    | 0.051          |
| 1-4 per week                                    | 97/733 (13.2)                                                     | 134/1033 (13.0)    | 1.34 (1.00 - 1.81) | 0.053          | 1.19 (0.86 - 1.65)    | 0.301          |
| Nearly every day                                | 219/733 (29.9)                                                    | 205/1033 (19.8)    | 1.98 (1.56 - 2.52) | <0.001         | 1.65 (1.27 - 2.16)    | <0.001         |
| <i>n</i>                                        | 1766                                                              |                    |                    |                |                       |                |
|                                                 | Low PA                                                            | Moderate-high PA   |                    |                |                       |                |
| Never/nearly never                              | 301/688 (43.8)                                                    | 465/1024 (45.4)    |                    |                |                       |                |
| 1-4 per month                                   | 124/688 (18.0)                                                    | 178/1024 (17.4)    | 1.08 (0.82 - 1.41) | 0.596          | 1.05 (0.80 - 1.38)    | 0.728          |
| 1-4 per week                                    | 79/688 (11.5)                                                     | 146/1024 (14.3)    | 0.84 (0.61 - 1.14) | 0.257          | 0.77 (0.56 - 1.06)    | 0.113          |
| Nearly every day                                | 184/688 (26.7)                                                    | 235/1024 (22.9)    | 1.21 (0.95 - 1.54) | 0.122          | 1.10 (0.86 - 1.41)    | 0.465          |
| <i>n</i>                                        | 1712                                                              |                    |                    |                |                       |                |
|                                                 | Overall burnout                                                   | No overall burnout |                    |                |                       |                |
| Never/nearly never                              | 115/275 (41.8)                                                    | 700/1530 (45.8)    |                    |                |                       |                |
| 1-4 per month                                   | 52/275 (18.9)                                                     | 265/1530 (17.3)    | 1.19 (0.84 - 1.71) | 0.329          | 1.13 (0.78 - 1.62)    | 0.528          |
| 1-4 per week                                    | 34/275 (12.4)                                                     | 204/1530 (13.3)    | 1.01 (0.67 - 1.53) | 0.946          | 1.03 (0.68 - 1.56)    | 0.891          |
| Nearly every day                                | 74/275 (26.9)                                                     | 361/1530 (23.6)    | 1.25 (0.91 - 1.72) | 0.173          | 1.25 (0.90 - 1.73)    | 0.186          |
| <i>n</i>                                        | 1805                                                              |                    |                    |                |                       |                |

EE, emotional exhaustion; DP, depersonalisation; PA, personal accomplishment; OR, odds ratio; CI, confidence interval; <sup>†</sup>The *n* presented represents the sample for each unadjusted analysis. The *n* for the adjusted analyses are in Supplement 1, Table S10; <sup>‡</sup>Some participants did not provide sufficient information from which to determine their night shifts. The *n* presented are from those who answered sufficiently; <sup>¶</sup>Adjusted for age, BMI, gender, marital status, hypertension, cigarette use, caffeine use, alcohol use, second job, primary activity, years as police officers, exercise frequency, and seniority. Variables included in each model are in Supplement 1, Table S10 and model fit is reported in Supplement 1, Table S11.

**Table S10.** Variables included in models used to examine associations between night shift frequency in police working fixed shifts

| Shift work and sleep characteristics, <i>n</i> <sup>‡</sup> | Emotional Exhaustion             | Depersonalisation             | Personal Accomplishment          | Burnout (High EE+DP) |
|-------------------------------------------------------------|----------------------------------|-------------------------------|----------------------------------|----------------------|
| Night shift frequency                                       | Gender, cigarette use, seniority | Age, caffeine use, second job | Age, BMI <sup>†</sup> , exercise | Gender, seniority    |
| <i>n</i>                                                    | 1683                             | 1494                          | 1688                             | 1753                 |

EE, emotional exhaustion; DP, depersonalisation.

**Table S11.** Model fit assessment for associations between night shift frequency and burnout in police working fixed shifts

| Burnout Outcome         | Baseline -2 log-likelihood | Block 1 -2 log-likelihood | Block 1 model vs Baseline model |                | Block 2 -2 log-likelihood | Block 2 model vs Block 1 model |                | Block 2 model vs Baseline model |                |
|-------------------------|----------------------------|---------------------------|---------------------------------|----------------|---------------------------|--------------------------------|----------------|---------------------------------|----------------|
|                         |                            |                           | $\chi^2$                        | <i>P</i> Value |                           | $\chi^2$                       | <i>P</i> Value | $\chi^2$                        | <i>P</i> Value |
| Emotional Exhaustion    | 1765.283                   | 1725.032                  | 40.251                          | <0.001         | 1722.576                  | 2.456                          | 0.483          | 42.707                          | <0.001         |
| Depersonalization       | 2043.728                   | 2003.702                  | 40.026                          | <0.001         | 1989.114                  | 14.588                         | 0.002          | 54.614                          | <0.001         |
| Personal Accomplishment | 2274.339                   | 2247.300                  | 27.039                          | <0.001         | 2242.950                  | 4.349                          | 0.226          | 31.388                          | 0.001          |
| Overall Burnout         | 1509.658                   | 1488.810                  | 20.847                          | 0.004          | 1.486.948                 | 1.862                          | 0.602          | 22.709                          | 0.012          |

STROBE Statement—Checklist of items that should be included in reports of *cross-sectional studies*

|                           | Item No | Recommendation                                                                                                                                                                       | Reported on Page No.                                                                                                            |
|---------------------------|---------|--------------------------------------------------------------------------------------------------------------------------------------------------------------------------------------|---------------------------------------------------------------------------------------------------------------------------------|
| <b>Title and abstract</b> | 1       | (a) Indicate the study's design with a commonly used term in the title or the abstract                                                                                               | Page 1                                                                                                                          |
|                           |         | (b) Provide in the abstract an informative and balanced summary of what was done and what was found                                                                                  | Page 3                                                                                                                          |
| <b>Introduction</b>       |         |                                                                                                                                                                                      |                                                                                                                                 |
| Background/rationale      | 2       | Explain the scientific background and rationale for the investigation being reported                                                                                                 | Pages 5-6                                                                                                                       |
| Objectives                | 3       | State specific objectives, including any prespecified hypotheses                                                                                                                     | Page 6, 9                                                                                                                       |
| <b>Methods</b>            |         |                                                                                                                                                                                      |                                                                                                                                 |
| Study design              | 4       | Present key elements of study design early in the paper                                                                                                                              | Pages 6-8 with additional details presented in Ref#3                                                                            |
| Setting                   | 5       | Describe the setting, locations, and relevant dates, including periods of recruitment, exposure, follow-up, and data collection                                                      | Pages 6-8 with additional details presented in Ref# 3                                                                           |
| Participants              | 6       | (a) Give the eligibility criteria, and the sources and methods of selection of participants                                                                                          | Pages 6-7 with additional details presented in Ref# 3                                                                           |
| Variables                 | 7       | Clearly define all outcomes, exposures, predictors, potential confounders, and effect modifiers. Give diagnostic criteria, if applicable                                             | Pages 7-8                                                                                                                       |
| Data sources/ measurement | 8*      | For each variable of interest, give sources of data and details of methods of assessment (measurement). Describe comparability of assessment methods if there is more than one group | Pages 7-8                                                                                                                       |
| Bias                      | 9       | Describe any efforts to address potential sources of bias                                                                                                                            | Pages 6-7                                                                                                                       |
| Study size                | 10      | Explain how the study size was arrived at                                                                                                                                            | Pages 6-7                                                                                                                       |
| Quantitative variables    | 11      | Explain how quantitative variables were handled in the analyses. If applicable, describe which groupings were chosen and why                                                         | Pages 7-9                                                                                                                       |
| Statistical methods       | 12      | (a) Describe all statistical methods, including those used to control for confounding                                                                                                | Pages 8-9                                                                                                                       |
|                           |         | (b) Describe any methods used to examine subgroups and interactions                                                                                                                  | Page 7, 8, 13, 24, 25                                                                                                           |
|                           |         | (c) Explain how missing data were addressed                                                                                                                                          | Pages 11-12, reported in Table 1; Pages 15-16, reported in Table 2; Page 18, reported in Table 3; Page 20, reported in Table 4. |

|                          |     |                                                                                                                                                                                                              |                                         |
|--------------------------|-----|--------------------------------------------------------------------------------------------------------------------------------------------------------------------------------------------------------------|-----------------------------------------|
|                          |     | (d) If applicable, describe analytical methods taking account of sampling strategy                                                                                                                           | N/A                                     |
|                          |     | (e) Describe any sensitivity analyses                                                                                                                                                                        | N/A                                     |
| <b>Results</b>           |     |                                                                                                                                                                                                              |                                         |
| Participants             | 13* | (a) Report numbers of individuals at each stage of study—eg numbers potentially eligible, examined for eligibility, confirmed eligible, included in the study, completing follow-up, and analysed            | Pages 6-7                               |
|                          |     | (b) Give reasons for non-participation at each stage                                                                                                                                                         | Pages 6-7                               |
|                          |     | (c) Consider use of a flow diagram                                                                                                                                                                           | Not included                            |
| Descriptive data         | 14* | (a) Give characteristics of study participants (eg demographic, clinical, social) and information on exposures and potential confounders                                                                     | Pages 10-12, Reported in Table 1        |
|                          |     | (b) Indicate number of participants with missing data for each variable of interest                                                                                                                          | Pages 10-12, Reported in Table 1        |
| Outcome data             | 15* | Report numbers of outcome events or summary measures                                                                                                                                                         | Pages 10-12, Reported in Table 1        |
| Main results             | 16  | (a) Give unadjusted estimates and, if applicable, confounder-adjusted estimates and their precision (eg, 95% confidence interval). Make clear which confounders were adjusted for and why they were included | Pages 13-20, and reported in tables 2-4 |
|                          |     | (b) Report category boundaries when continuous variables were categorized                                                                                                                                    | Pages 13-20, and reported in tables 2-4 |
|                          |     | (c) If relevant, consider translating estimates of relative risk into absolute risk for a meaningful time period                                                                                             | N/A                                     |
| Other analyses           | 17  | Report other analyses done—eg analyses of subgroups and interactions, and sensitivity analyses                                                                                                               | Supplement 1, Pages 1-10                |
| <b>Discussion</b>        |     |                                                                                                                                                                                                              |                                         |
| Key results              | 18  | Summarise key results with reference to study objectives                                                                                                                                                     | Page 21                                 |
| Limitations              | 19  | Discuss limitations of the study, taking into account sources of potential bias or imprecision. Discuss both direction and magnitude of any potential bias                                                   | Page 25-26                              |
| Interpretation           | 20  | Give a cautious overall interpretation of results considering objectives, limitations, multiplicity of analyses, results from similar studies, and other relevant evidence                                   | Pages 21-26                             |
| Generalisability         | 21  | Discuss the generalisability (external validity) of the study results                                                                                                                                        | Pages 21-26                             |
| <b>Other information</b> |     |                                                                                                                                                                                                              |                                         |
| Funding                  | 22  | Give the source of funding and the role of the funders for the present study and, if applicable, for the original study on which the present article is based                                                | Page 27                                 |

\*Give information separately for exposed and unexposed groups.

**Note:** An Explanation and Elaboration article discusses each checklist item and gives methodological background and published examples of transparent reporting. The STROBE checklist is best used in conjunction with this article (freely available on the Web sites of PLoS Medicine at <http://www.plosmedicine.org/>, Annals of Internal Medicine at



1  
2  
3  
4  
5  
6  
7  
8  
9  
10  
11  
12  
13  
14  
15  
16  
17  
18  
19  
20  
21  
22  
23  
24  
25  
26  
27  
28  
29  
30  
31  
32  
33  
34  
35  
36  
37  
38  
39  
40  
41  
42  
43  
44  
45  
46  
47  
48  
49  
50  
51  
52  
53  
54  
55  
56  
57  
58  
59  
60

<http://www.annals.org/>, and *Epidemiology* at <http://www.epidem.com/>). Information on the STROBE Initiative is available at [www.strobe-statement.org](http://www.strobe-statement.org).

For peer review only
