# Supplementary material for: Associations between shift work characteristics, shift work schedules, sleep and burnout in North American police officers: a cross-sectional study
Source: PubMed Central journal article supplement — BMJ Open. 2019 Dec 1;9(11):e030302. doi: 10.1136/bmjopen-2019-030302 (PMC6924705; doi:10.1136/bmjopen-2019-030302), 2019-12-01
Supplement: bmjopen-2019-030302supp001.pdf [file bmjopen-2019-030302supp001.pdf]

## Supplement

**Table S1.** Multicollinearity statistics for all shift work and sleep predictor variables included in the multiple logistic regression analysis

| Predictor variable                    | Multicollinearity Statistics |                           |
|---------------------------------------|------------------------------|---------------------------|
|                                       | Tolerance                    | Variance Inflation Factor |
| <b><i>Emotional Exhaustion</i></b>    |                              |                           |
| Night shift frequency                 | 0.932                        | 1.073                     |
| Long work shifts                      | 0.884                        | 1.131                     |
| Long work weeks                       | 0.860                        | 1.163                     |
| Mandatory overtime                    | 0.525                        | 1.904                     |
| Voluntary overtime                    | 0.455                        | 2.197                     |
| Any overtime                          | 0.352                        | 2.840                     |
| Shift rotation                        | 0.977                        | 1.023                     |
| Sleep duration                        | 0.947                        | 1.056                     |
| Sleepiness                            | 0.982                        | 1.019                     |
| <b><i>Depersonalisation</i></b>       |                              |                           |
| Night shift frequency                 | 0.936                        | 1.068                     |
| Long work shifts                      | 0.888                        | 1.127                     |
| Long work weeks                       | 0.859                        | 1.164                     |
| Mandatory overtime                    | 0.528                        | 1.893                     |
| Voluntary overtime                    | 0.458                        | 2.181                     |
| Any overtime                          | 0.354                        | 2.821                     |
| Shift rotation                        | 0.978                        | 1.023                     |
| Sleep duration                        | 0.951                        | 1.051                     |
| Sleepiness                            | 0.984                        | 1.017                     |
| <b><i>Personal Accomplishment</i></b> |                              |                           |
| Night shift frequency                 | 0.940                        | 1.064                     |
| Long work shifts                      | 0.885                        | 1.130                     |
| Long work weeks                       | 0.862                        | 1.161                     |
| Mandatory overtime                    | 0.532                        | 1.881                     |
| Voluntary overtime                    | 0.462                        | 2.165                     |
| Any overtime                          | 0.357                        | 2.798                     |
| Shift rotation                        | 0.977                        | 1.023                     |
| Sleep duration                        | 0.954                        | 1.049                     |
| Sleepiness                            | 0.986                        | 1.014                     |
| <b><i>Burnout (High EE+DP)</i></b>    |                              |                           |
| Night shift frequency                 | 0.934                        | 1.071                     |
| Long work shifts                      | 0.883                        | 1.133                     |
| Long work weeks                       | 0.858                        | 1.165                     |
| Mandatory overtime                    | 0.527                        | 1.898                     |
| Voluntary overtime                    | 0.455                        | 2.198                     |
| Any overtime                          | 0.350                        | 2.854                     |
| Shift rotation                        | 0.979                        | 1.022                     |
| Sleep duration                        | 0.950                        | 1.053                     |
| Sleepiness                            | 0.983                        | 1.018                     |

EE, emotional exhaustion; DP, depersonalization.

**Table S2.** Pearson correlation coefficient between shift work and sleep predictor variables

|                              | <b>Long work shifts</b> | <b>Long work weeks</b> | <b>Mandatory overtime</b> | <b>Voluntary overtime</b> | <b>Any overtime</b> | <b>Shift rotation</b> | <b>Sleep Duration</b> | <b>Sleepiness</b> |
|------------------------------|-------------------------|------------------------|---------------------------|---------------------------|---------------------|-----------------------|-----------------------|-------------------|
| <b>Night shift frequency</b> | 0.076                   | 0.053                  | 0.155                     | 0.034                     | 0.132               | 0.026                 | 0.146                 | 0.099             |
| <b>Long work shifts</b>      |                         | 0.324                  | 0.094                     | 0.106                     | 0.115               | -0.027                | 0.057                 | 0.031             |
| <b>Long work weeks</b>       |                         |                        | 0.068                     | 0.244                     | 0.195               | -0.051                | 0.056                 | 0.008             |
| <b>Mandatory overtime</b>    |                         |                        |                           | -0.033                    | 0.539               | 0.102                 | 0.101                 | 0.059             |
| <b>Voluntary overtime</b>    |                         |                        |                           |                           | 0.609               | -0.012                | 0.013                 | 0.006             |
| <b>Any overtime</b>          |                         |                        |                           |                           |                     | 0.063                 | 0.071                 | 0.021             |
| <b>Shift rotation</b>        |                         |                        |                           |                           |                     |                       | 0.105                 | 0.011             |
| <b>Sleep duration</b>        |                         |                        |                           |                           |                     |                       |                       | 0.074             |

**Table S3.** High burnout outcomes associated with working at least 1 long shift in the past 4 weeks (n=3140)

| Worked >0 Long Shifts<br>in Past 4 Weeks, n <sup>†,‡</sup> | Positive result in police with high burnout,<br>No./No. total (%) |                    | Unadjusted         |         | Adjusted <sup>¶</sup> |         |
|------------------------------------------------------------|-------------------------------------------------------------------|--------------------|--------------------|---------|-----------------------|---------|
|                                                            |                                                                   |                    | OR (95% CI)        | P Value | OR (95% CI)           | P Value |
|                                                            | High EE                                                           | Low-moderate EE    |                    |         |                       |         |
| No                                                         | 69/575 (12.0)                                                     | 296/1719 (17.2)    |                    |         |                       |         |
| Yes                                                        | 506/575 (88.0)                                                    | 1423/1719 (82.8)   | 1.53 (1.52 - 2.02) | 0.003   | 1.54 (1.51 - 2.06)    | 0.004   |
| n                                                          | 2294                                                              |                    |                    |         |                       |         |
|                                                            | High DP                                                           | Low-moderate DP    |                    |         |                       |         |
| No                                                         | 151/1027 (14.7)                                                   | 226/1316 (17.2)    |                    |         |                       |         |
| Yes                                                        | 876/1027 (85.3)                                                   | 1090/1316 (82.8)   | 1.20 (0.96 - 1.51) | 0.107   | 1.12 (0.88 - 1.41)    | 0.365   |
| n                                                          | 2343                                                              |                    |                    |         |                       |         |
|                                                            | Low PA                                                            | Moderate-high PA   |                    |         |                       |         |
| No                                                         | 167/962 (17.4)                                                    | 201/1314 (15.3)    |                    |         |                       |         |
| Yes                                                        | 795/962 (82.6)                                                    | 1113/1314 (84.7)   | 0.86 (0.69 - 1.08) | 0.187   | 0.85 (0.67 - 1.08)    | 0.187   |
| n                                                          | 2276                                                              |                    |                    |         |                       |         |
|                                                            | Overall burnout                                                   | No overall burnout |                    |         |                       |         |
| No                                                         | 51/426 (12.0)                                                     | 338/1967 (17.2)    |                    |         |                       |         |
| Yes                                                        | 375/426 (88.0)                                                    | 1629/1967 (82.8)   | 1.53 (1.11 - 2.09) | 0.009   | 1.43 (1.04 - 1.98)    | 0.029   |
| n                                                          | 2393                                                              |                    |                    |         |                       |         |

EE, emotional exhaustion; DP, depersonalisation; PA, personal accomplishment; OR, odds ratio; CI, confidence interval; <sup>†</sup>The *n* presented represents the sample for each unadjusted analysis. The *n* for the adjusted analyses are in Supplement 1, Table S4; <sup>‡</sup>Some participants did not provide sufficient information from which to determine their long shifts. The *n* presented are from those who answered sufficiently; <sup>¶</sup>Adjusted for age, BMI, gender, marital status, hypertension, cigarette use, caffeine use, alcohol use, second job, primary activity, years as police officers, exercise frequency, and seniority. Variables included in each model are in Supplement 1, Table S4 and model fit is reported in Supplement 1, Table S5.

**Table S4.** Variables included in models used to examine associations between sleep and sleepiness, shift schedules and burnout outcomes in police regularly working long shifts ( $\geq 2$  per week), more than 1 long shift in the past 4 weeks

| Shift work and sleep characteristics, $n^{\ddagger}$ | Emotional Exhaustion             | Depersonalisation                                                                       | Personal Accomplishment                                         | Burnout (High EE+DP)     |
|------------------------------------------------------|----------------------------------|-----------------------------------------------------------------------------------------|-----------------------------------------------------------------|--------------------------|
| (Extended shift sample)<br>Sleep duration            | Gender, seniority                | Age, blood pressure, primary activity, seniority                                        | Second job                                                      | Age, seniority           |
| <i>n</i>                                             | 813                              | 782                                                                                     | 691                                                             | 842                      |
| (Extended shift sample)<br>Sleepiness                | Gender, seniority                | Age, exercise                                                                           | Cigarette use, second job                                       | Seniority                |
| <i>n</i>                                             | 856                              | 904                                                                                     | 713                                                             | 887                      |
| >0 Long shifts in past 4 weeks                       | Gender, Cigarette use, seniority | Age, cigarette use, caffeine use, primary activity, years in law enforcement, seniority | Age, BMI <sup>†</sup> , blood pressure, Cigarette use, exercise | Cigarette use, seniority |
| <i>n</i>                                             | 2230                             | 2250                                                                                    | 2134                                                            | 2330                     |

EE, emotional exhaustion; DP, depersonalization; OT, overtime; BMI, body mass index; <sup>†</sup>BMI was a continuous variable; <sup>‡</sup>The *n* presented represents the sample for the adjusted analyses.

**Table S5.** Model fit assessment for models used to examine associations between sleep, sleepiness, shift schedules and burnout outcomes in police regularly working long shifts ( $\geq 2$  per week) and more than 1 long shift in the past 4 weeks

| Predictor variable               | Block 1 model vs Baseline model |                           |          |         | Block 2 model vs Block 1 model |          |         | Block 2 model vs Baseline model |         |
|----------------------------------|---------------------------------|---------------------------|----------|---------|--------------------------------|----------|---------|---------------------------------|---------|
|                                  | Baseline -2 log-likelihood      | Block 1 -2 log-likelihood | $\chi^2$ | P Value | Block 2 -2 log-likelihood      | $\chi^2$ | P Value | $\chi^2$                        | P Value |
| Emotional Exhaustion             |                                 |                           |          |         |                                |          |         |                                 |         |
| Sleep Duration (Table S8)        | 955.246                         | 926.646                   | 28.600   | <0.001  | 908.051                        | 18.594   | <0.001  | 47.194                          | <0.001  |
| Sleepiness (Table S8)            | 992.275                         | 964.570                   | 27.705   | <0.001  | 947.997                        | 16.573   | <0.001  | 44.278                          | <0.001  |
| At least 1 long shift (Table S3) | 2526.519                        | 2458.661                  | 67.858   | <0.001  | 2449.703                       | 8.959    | 0.003   | 76.816                          | <0.001  |
| Depersonalisation                |                                 |                           |          |         |                                |          |         |                                 |         |
| Sleep Duration (Table S8)        | 1074.158                        | 1033.530                  | 40.628   | <0.001  | 1027.265                       | 6.265    | 0.012   | 46.894                          | <0.001  |
| Sleepiness (Table S8)            | 1232.672                        | 1203.538                  | 29.134   | <0.001  | 1183.564                       | 19.974   | <0.001  | 49.108                          | <0.001  |
| At least 1 long shift (Table S3) | 3094.782                        | 2989.169                  | 105.613  | <0.001  | 2988.346                       | 0.824    | 0.364   | 106.437                         | <0.001  |
| Personal Accomplishment          |                                 |                           |          |         |                                |          |         |                                 |         |
| Sleep Duration (Table S8)        | 915.170                         | 910.236                   | 4.934    | 0.026   | 910.222                        | 0.014    | 0.907   | 4.948                           | 0.084   |
| Sleepiness (Table S8)            | 957.902                         | 948.042                   | 9.860    | 0.007   | 947.864                        | 0.178    | 0.673   | 10.038                          | 0.018   |
| At least 1 long shift (Table S3) | 2905.861                        | 2845.281                  | 60.580   | <0.001  | 2843.543                       | 1.738    | 0.187   | 62.318                          | <0.001  |
| Overall Burnout                  |                                 |                           |          |         |                                |          |         |                                 |         |
| Sleep Duration (Table S8)        | 838.781                         | 814.448                   | 24.334   | 0.001   | 801.083                        | 13.365   | <0.001  | 37.698                          | <0.001  |
| Sleepiness (Table S8)            | 872.535                         | 855.789                   | 16.746   | 0.010   | 840.539                        | 15.250   | <0.001  | 31.996                          | <0.001  |
| At least 1 long shift (Table S3) | 2204.559                        | 2163.002                  | 41.557   | <0.001  | 2157.926                       | 5.076    | 0.024   | 46.633                          | <0.001  |

**Table S6.** Variables included in the models used to examine associations between shift characteristics, shift schedules, sleep, and burnout outcomes

| Shift work and sleep characteristics, <i>n</i> <sup>‡</sup> | Emotional Exhaustion                       | Depersonalisation                                                                       | Personal Accomplishment                                         | Burnout (High EE+DP)                                    |
|-------------------------------------------------------------|--------------------------------------------|-----------------------------------------------------------------------------------------|-----------------------------------------------------------------|---------------------------------------------------------|
| <b>Night shift frequency</b>                                | Gender, cigarette use, seniority           | Age, cigarette use, second job, primary activity, years in law enforcement, seniority   | Age, BMI <sup>†</sup> , cigarette use, exercise                 | Age, cigarette use, seniority                           |
| <i>n</i>                                                    | 2882                                       | 2440                                                                                    | 2881                                                            | 3015                                                    |
| <b>Long work shifts</b>                                     | Gender, cigarette use, exercise, seniority | Age, cigarette use, caffeine use, primary activity, years in law enforcement, seniority | Age, BMI <sup>†</sup> , caffeine use, blood pressure, exercise  | Gender, cigarette use, seniority                        |
| <i>n</i>                                                    | 2220                                       | 2250                                                                                    | 2134                                                            | 2328                                                    |
| <b>Long work weeks</b>                                      | Gender, cigarette use, seniority           | Age, cigarette use, second job, primary activity, seniority                             | Age, BMI <sup>†</sup> , cigarette use, exercise                 | Age, cigarette use, seniority                           |
| <i>n</i>                                                    | 2862                                       | 2479                                                                                    | 2873                                                            | 2994                                                    |
| <b>Shift schedule</b>                                       | Gender, cigarette use, seniority           | Age, cigarette use, second job, primary activity, years in law enforcement, seniority   | Age, BMI <sup>†</sup> , exercise                                | Age, cigarette use, years in law enforcement, seniority |
| <i>n</i>                                                    | 2894                                       | 2451                                                                                    | 2898                                                            | 2992                                                    |
| <b>Mandatory OT</b>                                         | Gender, cigarette use, seniority           | Age, cigarette use, second job, primary activity, years in law enforcement, seniority   | Age, BMI <sup>†</sup> , exercise                                | Age, cigarette use, seniority                           |
| <i>n</i>                                                    | 2512                                       | 2353                                                                                    | 2521                                                            | 2622                                                    |
| <b>Voluntary OT</b>                                         | Gender, cigarette use, seniority           | Age, cigarette use, primary activity, seniority                                         | Age, BMI <sup>†</sup> , cigarette use                           | Age, cigarette use, seniority                           |
| <i>n</i>                                                    | 2531                                       | 2587                                                                                    | 2536                                                            | 2639                                                    |
| <b>Any OT</b>                                               | Gender, cigarette use, seniority           | Age, cigarette use, primary activity, years in law enforcement, seniority               | Age, BMI <sup>†</sup> , cigarette use, exercise                 | Age, cigarette use, seniority                           |
| <i>n</i>                                                    | 2368                                       | 2407                                                                                    | 2378                                                            | 2470                                                    |
| <b>Sleepiness</b>                                           | Gender, cigarette use, exercise, seniority | Age, cigarette use, second job, primary activity, seniority                             | Age, BMI <sup>†</sup> , cigarette use, blood pressure, exercise | Age, cigarette use, seniority                           |
| <i>n</i>                                                    | 2772                                       | 2375                                                                                    | 2667                                                            | 2921                                                    |
| <b>Sleep duration</b>                                       | Gender, cigarette use, seniority           | Age, cigarette use, caffeine use, primary activity, exercise, seniority                 | Age, BMI <sup>†</sup> , years in law enforcement, exercise      | Age, primary activity, seniority                        |
| <i>n</i>                                                    | 2554                                       | 2595                                                                                    | 2537                                                            | 2663                                                    |

EE, emotional exhaustion; DP, depersonalization; OT, overtime; BMI, body mass index; <sup>†</sup>BMI was a continuous variable; <sup>‡</sup>The *n* presented represents the sample for the adjusted analyses.

**Table S7.** Model fit assessment for models used to examine associations between shift work characteristics, shift schedules, sleep and burnout outcomes

| Predictor variable                           | Block 1 model vs Baseline model |                           |          |         | Block 2 model vs Block 1 model |          |         | Block 2 model vs Baseline model |         |
|----------------------------------------------|---------------------------------|---------------------------|----------|---------|--------------------------------|----------|---------|---------------------------------|---------|
|                                              | Baseline -2 log-likelihood      | Block 1 -2 log-likelihood | $\chi^2$ | P Value | Block 2 -2 log-likelihood      | $\chi^2$ | P Value | $\chi^2$                        | P Value |
| <b>Emotional Exhaustion</b>                  |                                 |                           |          |         |                                |          |         |                                 |         |
| Night shift frequency                        | 3242.398                        | 3177.483                  | 64.915   | <0.001  | 3176.031                       | 1.451    | 0.694   | 66.367                          | <0.001  |
| Long work shifts per week ( $\geq 11$ hours) | 2518.501                        | 2437.941                  | 80.560   | <0.001  | 2424.368                       | 13.573   | 0.004   | 94.133                          | <0.001  |
| Long work weeks                              | 3224.288                        | 3163.277                  | 61.011   | <0.001  | 3161.114                       | 2.162    | 0.141   | 63.173                          | <0.001  |
| Mandatory overtime                           | 2855.519                        | 2803.785                  | 51.734   | <0.001  | 2792.186                       | 11.599   | 0.001   | 63.333                          | <0.001  |
| Voluntary overtime                           | 2851.474                        | 2803.191                  | 48.282   | <0.001  | 2802.681                       | 0.510    | 0.475   | 48.792                          | <0.001  |
| Any overtime (Mandatory or voluntary)        | 2695.674                        | 2650.557                  | 45.117   | <0.001  | 2647.720                       | 2.836    | 0.092   | 47.953                          | <0.001  |
| Shift schedule                               | 3264.646                        | 3200.499                  | 64.147   | <0.001  | 3176.911                       | 23.588   | <0.001  | 87.735                          | <0.001  |
| Sleep duration                               | 2884.430                        | 2829.733                  | 54.696   | <0.001  | 2805.322                       | 24.411   | <0.001  | 79.108                          | <0.001  |
| Sleepiness                                   | 3124.160                        | 3046.472                  | 77.688   | <0.001  | 3009.107                       | 37.365   | <0.001  | 115.053                         | <0.001  |
| <b>Depersonalisation</b>                     |                                 |                           |          |         |                                |          |         |                                 |         |
| Night shift frequency                        | 3360.466                        | 3252.568                  | 107.898  | <0.001  | 3245.833                       | 6.734    | 0.081   | 114.632                         | <0.001  |
| Long work shifts per week ( $\geq 11$ hours) | 3094.782                        | 2989.169                  | 105.613  | <0.001  | 2984.924                       | 4.245    | 0.236   | 109.858                         | <0.001  |
| Long work weeks                              | 3415.808                        | 3316.551                  | 99.258   | <0.001  | 3316.472                       | 0.078    | 0.779   | 99.336                          | <0.001  |
| Mandatory overtime                           | 3243.362                        | 3134.813                  | 108.549  | <0.001  | 3128.779                       | 6.034    | 0.014   | 114.583                         | <0.001  |
| Voluntary overtime                           | 3568.120                        | 3475.359                  | 92.761   | <0.001  | 3470.640                       | 4.719    | 0.030   | 97.480                          | <0.001  |
| Any overtime (Mandatory or voluntary)        | 3322.268                        | 3216.873                  | 105.395  | <0.001  | 3202.430                       | 14.443   | <0.001  | 119.838                         | <0.001  |
| Shift schedule                               | 3376.754                        | 3267.995                  | 108.759  | <0.001  | 3263.216                       | 4.779    | 0.189   | 113.538                         | <0.001  |
| Sleep duration                               | 3579.600                        | 3464.638                  | 114.963  | <0.001  | 3462.581                       | 2.056    | 0.152   | 117.019                         | <0.001  |
| Sleepiness                                   | 3273.321                        | 3180.016                  | 93.305   | <0.001  | 3163.182                       | 16.833   | <0.001  | 110.138                         | <0.001  |
| <b>Personal Accomplishment</b>               |                                 |                           |          |         |                                |          |         |                                 |         |
| Night shift frequency                        | 3933.344                        | 3862.300                  | 71.044   | <0.001  | 3857.460                       | 4.841    | 0.184   | 75.885                          | <0.001  |
| Long work shifts per week ( $\geq 11$ hours) | 2905.861                        | 2845.281                  | 60.580   | <0.001  | 2841.977                       | 3.304    | 0.347   | 63.884                          | <0.001  |
| Long work weeks                              | 3922.667                        | 3854.019                  | 68.648   | <0.001  | 3848.346                       | 5.674    | 0.017   | 74.322                          | <0.001  |
| Mandatory overtime                           | 3441.816                        | 3381.423                  | 60.393   | <0.001  | 3381.416                       | 0.007    | 0.935   | 60.400                          | <0.001  |
| Voluntary overtime                           | 3459.090                        | 3392.836                  | 66.254   | <0.001  | 3390.823                       | 2.012    | 0.156   | 68.266                          | <0.001  |
| Any overtime (Mandatory or voluntary)        | 3246.670                        | 3183.680                  | 62.990   | <0.001  | 3183.536                       | 0.144    | 0.704   | 63.134                          | <0.001  |
| Shift schedule                               | 3959.849                        | 3895.533                  | 64.316   | <0.001  | 3881.181                       | 14.352   | 0.002   | 78.668                          | <0.001  |
| Sleep duration                               | 3443.452                        | 3390.407                  | 53.045   | <0.001  | 3384.026                       | 6.380    | 0.012   | 59.425                          | <0.001  |
| Sleepiness                                   | 3643.751                        | 3580.752                  | 62.999   | <0.001  | 3577.116                       | 3.505    | 0.061   | 66.635                          | <0.001  |
| <b>Overall Burnout</b>                       |                                 |                           |          |         |                                |          |         |                                 |         |
| Night shift frequency                        | 2828.199                        | 2767.204                  | 60.995   | <0.001  | 2764.317                       | 2.888    | 0.409   | 63.883                          | <0.001  |
| Long work shifts per week ( $\geq 11$ hours) | 2203.759                        | 2156.970                  | 46.789   | <0.001  | 2147.794                       | 9.176    | 0.027   | 55.965                          | <0.001  |
| Long work weeks                              | 2825.977                        | 2768.128                  | 57.849   | <0.001  | 2766.499                       | 1.629    | 0.202   | 59.478                          | <0.001  |
| Mandatory overtime                           | 2522.921                        | 2471.633                  | 51.289   | <0.001  | 2461.084                       | 10.549   | 0.001   | 61.837                          | <0.001  |
| Voluntary overtime                           | 2509.058                        | 2462.021                  | 47.038   | <0.001  | 2462.008                       | 0.013    | 0.910   | 47.051                          | <0.001  |
| Any overtime (Mandatory or voluntary)        | 2386.497                        | 2342.340                  | 44.158   | <0.001  | 2336.122                       | 6.218    | 0.013   | 50.375                          | <0.001  |
| Shift schedule                               | 2825.181                        | 2759.886                  | 65.295   | <0.001  | 2736.336                       | 23.549   | <0.000  | 88.845                          | <0.001  |
| Sleep duration                               | 2527.726                        | 2473.363                  | 54.363   | <0.001  | 2458.897                       | 14.466   | <0.001  | 68.829                          | <0.001  |
| Sleepiness                                   | 2748.475                        | 2693.100                  | 55.375   | <0.001  | 266.405                        | 26.694   | <0.001  | 82.070                          | <0.001  |

**Table S8.** High burnout outcomes associated with sleep and sleepiness in police regularly working long work shifts ( $\geq 2$  long work shifts per week; n=978)

| Sleep characteristic, n <sup>†,‡</sup> | Positive result in police with high burnout, No./No. total (%) |                    | Unadjusted         | P Value | Adjusted <sup>¶</sup> | P Value |
|----------------------------------------|----------------------------------------------------------------|--------------------|--------------------|---------|-----------------------|---------|
|                                        |                                                                |                    | OR (95% CI)        |         | OR (95% CI)           |         |
|                                        | High EE                                                        | Low-moderate EE    |                    |         |                       |         |
| Sleep duration                         |                                                                |                    |                    |         |                       |         |
| $\geq 6$ hours per night               | 105/228 (46.1)                                                 | 398/617 (64.5)     | 2.13 (1.56 - 2.90) | <0.001  | 2.02 (1.46 - 2.78)    | <0.001  |
| <6 hours per night                     | 123/228 (53.9)                                                 | 219/617 (35.5)     |                    |         |                       |         |
| n                                      | 845                                                            |                    |                    |         |                       |         |
| Sleepiness                             |                                                                |                    |                    |         |                       |         |
| <11 ESS                                | 139/234 (59.4)                                                 | 502/664 (75.6)     | 2.12 (1.55 - 2.90) | <0.001  | 1.99 (1.43 - 2.77)    | <0.001  |
| $\geq 11$ ESS                          | 95/234 (40.6)                                                  | 162/664 (24.4)     |                    |         |                       |         |
| n                                      | 898                                                            |                    |                    |         |                       |         |
|                                        | High DP                                                        | Low-moderate DP    |                    |         |                       |         |
| Sleep duration                         |                                                                |                    |                    |         |                       |         |
| $\geq 6$ hours per night               | 198/371 (53.4)                                                 | 317/486 (65.2)     | 1.64 (1.24 - 2.16) | <0.001  | 1.46 (1.09 - 1.97)    | 0.012   |
| <6 hours per night                     | 169/371 (46.6)                                                 | 173/487 (34.8)     |                    |         |                       |         |
| n                                      | 857                                                            |                    |                    |         |                       |         |
| Sleepiness                             |                                                                |                    |                    |         |                       |         |
| <11 ESS                                | 244/384 (63.5)                                                 | 403/523 (77.1)     | 1.93 (1.44 - 2.58) | <0.001  | 1.97 (1.46 - 2.66)    | <0.001  |
| $\geq 11$ ESS                          | 140/384 (36.5)                                                 | 120/523 (22.9)     |                    |         |                       |         |
| n                                      | 907                                                            |                    |                    |         |                       |         |
|                                        | Low PA                                                         | Moderate-high PA   |                    |         |                       |         |
| Sleep duration                         |                                                                |                    |                    |         |                       |         |
| $\geq 6$ hours per night               | 188/317 (59.3)                                                 | 311/516 (60.3)     | 1.04 (0.78 - 1.38) | 0.783   | 1.02 (0.74 - 1.40)    | 0.907   |
| <6 hours per night                     | 129/317 (40.7)                                                 | 205/516 (39.7)     |                    |         |                       |         |
| n                                      | 833                                                            |                    |                    |         |                       |         |
| Sleepiness                             |                                                                |                    |                    |         |                       |         |
| <11 ESS                                | 247/353 (70.)                                                  | 379/527 (71.9)     | 1.01 (0.82 - 1.48) | 0.533   | 1.08 (0.77 - 1.50)    | 0.673   |
| $\geq 11$ ESS                          | 106/353 (30.0)                                                 | 148/527 (28.1)     |                    |         |                       |         |
| n                                      | 880                                                            |                    |                    |         |                       |         |
|                                        | Overall burnout                                                | No overall burnout |                    |         |                       |         |
| Sleep duration                         |                                                                |                    |                    |         |                       |         |
| $\geq 6$ hours per night               | 77/169 (45.6)                                                  | 444/706 (62.9)     | 2.03 (1.44 - 2.84) | <0.001  | 1.92 (1.35 - 2.72)    | <0.001  |
| <6 hours per night                     | 92/169 (54.5)                                                  | 262/706 (37.1)     |                    |         |                       |         |
| n                                      | 875                                                            |                    |                    |         |                       |         |
| Sleepiness                             |                                                                |                    |                    |         |                       |         |
| <11 ESS                                | 101/175 (57.7)                                                 | 560/754 (74.3)     | 2.12 (1.50 - 2.98) | <0.001  | 2.03 (1.43 - 2.89)    | <0.001  |
| $\geq 11$ ESS                          | 74/175 (42.3)                                                  | 194/754 (25.7)     |                    |         |                       |         |
| n                                      | 929                                                            |                    |                    |         |                       |         |

EE, emotional exhaustion; DP, depersonalisation; PA, personal accomplishment; ESS, Epworth Sleepiness Scale; OR, odds ratio; CI, confidence interval; <sup>†</sup>The *n* presented represents the sample for each unadjusted analysis. The *n* for the adjusted analyses are in Supplement 1, Table S4; <sup>‡</sup>Some participants did not provide sufficient information from which to determine their sleep duration and sleepiness. The *n* presented are from those who answered sufficiently; <sup>¶</sup>Adjusted for age, BMI, gender, marital status, hypertension, cigarette use, caffeine use, alcohol use, second job, primary activity, years as police officers, exercise frequency, and seniority. Variables included in each model are in Supplement 1, Table S4, and model fit is reported in Supplement 1, Table S5.



**Table S9.** High burnout outcomes associated with night shift frequency in police working fixed shifts (n=1822)

| Night shift frequency, <i>n</i> <sup>†, ‡</sup> | Positive result in police with high burnout,<br>No./No. total (%) |                    | Unadjusted         |                | Adjusted <sup>¶</sup> |                |
|-------------------------------------------------|-------------------------------------------------------------------|--------------------|--------------------|----------------|-----------------------|----------------|
|                                                 |                                                                   |                    | OR (95% CI)        | <i>P</i> Value | OR (95% CI)           | <i>P</i> Value |
|                                                 | High EE                                                           | Low-moderate EE    |                    |                |                       |                |
| Never/nearly never                              | 170/378 (45.0)                                                    | 614/1357 (45.2)    |                    |                |                       |                |
| 1-4 per month                                   | 63/378 (16.7)                                                     | 245/1357 (18.1)    | 0.93 (0.67 - 1.29) | 0.656          | 0.90 (0.65 - 1.26)    | 0.550          |
| 1-4 per week                                    | 44/378 (11.6)                                                     | 180/1357 (13.3)    | 0.88 (0.61 - 1.28) | 0.510          | 0.92 (0.63 - 1.35)    | 0.666          |
| Nearly every day                                | 101/378 (26.7)                                                    | 318/1357 (23.4)    | 1.15 (0.87 - 1.52) | 0.338          | 1.17 (0.87 - 1.57)    | 0.290          |
| <i>n</i>                                        | 1735                                                              |                    |                    |                |                       |                |
|                                                 | High DP                                                           | Low-moderate DP    |                    |                |                       |                |
| Never/nearly never                              | 279/733 (38.1)                                                    | 518/1033 (50.1)    |                    |                |                       |                |
| 1-4 per month                                   | 138/733 (18.8)                                                    | 176/1033 (17.0)    | 1.46 (1.12 - 1.90) | 0.006          | 1.33 (1.00 - 1.78)    | 0.051          |
| 1-4 per week                                    | 97/733 (13.2)                                                     | 134/1033 (13.0)    | 1.34 (1.00 - 1.81) | 0.053          | 1.19 (0.86 - 1.65)    | 0.301          |
| Nearly every day                                | 219/733 (29.9)                                                    | 205/1033 (19.8)    | 1.98 (1.56 - 2.52) | <0.001         | 1.65 (1.27 - 2.16)    | <0.001         |
| <i>n</i>                                        | 1766                                                              |                    |                    |                |                       |                |
|                                                 | Low PA                                                            | Moderate-high PA   |                    |                |                       |                |
| Never/nearly never                              | 301/688 (43.8)                                                    | 465/1024 (45.4)    |                    |                |                       |                |
| 1-4 per month                                   | 124/688 (18.0)                                                    | 178/1024 (17.4)    | 1.08 (0.82 - 1.41) | 0.596          | 1.05 (0.80 - 1.38)    | 0.728          |
| 1-4 per week                                    | 79/688 (11.5)                                                     | 146/1024 (14.3)    | 0.84 (0.61 - 1.14) | 0.257          | 0.77 (0.56 - 1.06)    | 0.113          |
| Nearly every day                                | 184/688 (26.7)                                                    | 235/1024 (22.9)    | 1.21 (0.95 - 1.54) | 0.122          | 1.10 (0.86 - 1.41)    | 0.465          |
| <i>n</i>                                        | 1712                                                              |                    |                    |                |                       |                |
|                                                 | Overall burnout                                                   | No overall burnout |                    |                |                       |                |
| Never/nearly never                              | 115/275 (41.8)                                                    | 700/1530 (45.8)    |                    |                |                       |                |
| 1-4 per month                                   | 52/275 (18.9)                                                     | 265/1530 (17.3)    | 1.19 (0.84 - 1.71) | 0.329          | 1.13 (0.78 - 1.62)    | 0.528          |
| 1-4 per week                                    | 34/275 (12.4)                                                     | 204/1530 (13.3)    | 1.01 (0.67 - 1.53) | 0.946          | 1.03 (0.68 - 1.56)    | 0.891          |
| Nearly every day                                | 74/275 (26.9)                                                     | 361/1530 (23.6)    | 1.25 (0.91 - 1.72) | 0.173          | 1.25 (0.90 - 1.73)    | 0.186          |
| <i>n</i>                                        | 1805                                                              |                    |                    |                |                       |                |

EE, emotional exhaustion; DP, depersonalisation; PA, personal accomplishment; OR, odds ratio; CI, confidence interval; <sup>†</sup>The *n* presented represents the sample for each unadjusted analysis. The *n* for the adjusted analyses are in Supplement 1, Table S10; <sup>‡</sup>Some participants did not provide sufficient information from which to determine their night shifts. The *n* presented are from those who answered sufficiently; <sup>¶</sup>Adjusted for age, BMI, gender, marital status, hypertension, cigarette use, caffeine use, alcohol use, second job, primary activity, years as police officers, exercise frequency, and seniority. Variables included in each model are in Supplement 1, Table S10 and model fit is reported in Supplement 1, Table S11.

**Table S10.** Variables included in models used to examine associations between night shift frequency in police working fixed shifts

| Shift work and sleep characteristics, <i>n</i> <sup>‡</sup> | Emotional Exhaustion             | Depersonalisation             | Personal Accomplishment          | Burnout (High EE+DP) |
|-------------------------------------------------------------|----------------------------------|-------------------------------|----------------------------------|----------------------|
| Night shift frequency                                       | Gender, cigarette use, seniority | Age, caffeine use, second job | Age, BMI <sup>†</sup> , exercise | Gender, seniority    |
| <i>n</i>                                                    | 1683                             | 1494                          | 1688                             | 1753                 |

EE, emotional exhaustion; DP, depersonalisation.

**Table S11.** Model fit assessment for associations between night shift frequency and burnout in police working fixed shifts

| Burnout Outcome         | Baseline -2 log-likelihood | Block 1 -2 log-likelihood | Block 1 model vs Baseline model |                | Block 2 -2 log-likelihood | Block 2 model vs Block 1 model |                | Block 2 model vs Baseline model |                |
|-------------------------|----------------------------|---------------------------|---------------------------------|----------------|---------------------------|--------------------------------|----------------|---------------------------------|----------------|
|                         |                            |                           | $\chi^2$                        | <i>P</i> Value |                           | $\chi^2$                       | <i>P</i> Value | $\chi^2$                        | <i>P</i> Value |
| Emotional Exhaustion    | 1765.283                   | 1725.032                  | 40.251                          | <0.001         | 1722.576                  | 2.456                          | 0.483          | 42.707                          | <0.001         |
| Depersonalization       | 2043.728                   | 2003.702                  | 40.026                          | <0.001         | 1989.114                  | 14.588                         | 0.002          | 54.614                          | <0.001         |
| Personal Accomplishment | 2274.339                   | 2247.300                  | 27.039                          | <0.001         | 2242.950                  | 4.349                          | 0.226          | 31.388                          | 0.001          |
| Overall Burnout         | 1509.658                   | 1488.810                  | 20.847                          | 0.004          | 1.486.948                 | 1.862                          | 0.602          | 22.709                          | 0.012          |
